# Supplementary material for: The effect of climate change on avian offspring production: A global meta-analysis
Source: PubMed Central journal article supplement — Proc Natl Acad Sci U S A. 2023 May 1;120(19):e2208389120. doi: 10.1073/pnas.2208389120 (PMC10175715; doi:10.1073/pnas.2208389120), 2023-05-01
Supplement: pnas.2208389120.sapp.pdf [file pnas.2208389120.sapp.pdf]

## Supporting Information for

### **The effect of climate change on offspring production in 201 avian populations: a global meta-analysis**

Lucyna Halupka\*, Debora Arlt, Jere Tolvanen, Alexandre Millon, Pierre Bize, Peter Adamík, Pascal Albert, Wayne J. Arendt, Alexander V. Artemyev, Vittorio Baglione, Jerzy Bańbura, Mirosława Bańbura, Emilio Barba, Robert T. Barrett, Peter H. Becker, Eugen Belskii, Mark Bolton, E. Keith Bowers, Joël Bried, Lyanne Brouwer, Monika Bukacińska, Dariusz Bukaciński, Lesley Bulluck, Kate F. Carstens, Inês Catry, Motti Charter, Anna Chernomorets, Rita Covas, Monika Czuchra, Donald C. Dearborn, Florentino de Lope, Adrián S. Di Giacomo, Valery C. Dombrovski, Hugh Drummond, Michael J. Dunn, Tapio Eeva, Louise M. Emmerson, Yngve Espmark, Juan A. Fargallo, Sergey I. Gashkov, Elena Yu. Golubova, Michael Griesser, Michael P. Harris, Jeffrey P. Hoover, Zuzanna Jagiełło, Patrik Karell, Janusz Kloskowski, Walter D. Koenig, Heikki Kolunen, Małgorzata Korczak-Abshire, Erkki Korpimäki, Indrikis Krams, Miloš Krist, Sonja C. Krüger, Boris D. Kuranov, Xavier Lambin, Michael P. Lombardo, Andrey Lyakhov, Alfonso Marzal, Anders P. Møller, Verónica C. Neves, Jan Tøttrup Nielsen, Alexander Numerov, Beata Orłowska, Daniel Oro, Markus Öst, Richard A. Phillips, Hannu Pietiäinen, Vicente Polo, Jiří Porkert, Jaime Potti, Hannu Pöysä, Thierry Printemps, Jouke Prop, Petra Quillfeldt, Jaime A. Ramos, Pierre-Alain Ravussin, Robert N. Rosenfield, Alexandre Roulin, Dustin R. Rubenstein, Irina E. Samusenko, Denis A. Saunders, Michael Schaub, Juan C. Senar, Fabrizio Sergio, Tapio Solonen, Diana V. Solovyeva, Janusz Stępniewski, Paul M. Thompson, Marcin Tobolka, János Török, Martijn van de Pol, Louis Vernooij, Marcel E. Visser, David F. Westneat, Nathaniel T. Wheelwright, Jarosław Wiącek, Karen L. Wiebe, Andrew G. Wood, Andrzej Wuczyński, Dariusz Wysocki, Markéta Zárybnická, Antoni Margalida, Konrad Halupka

Corresponding author: Lucyna Halupka  
Email: [lucyna.halupka@uwr.edu.pl](mailto:lucyna.halupka@uwr.edu.pl)

**This PDF file includes:**

**Supporting Text S1.** Details about the criteria to classify the species as single- or multi-brooded.

**Supporting Text S2.** Sources of literature data included in the meta-analysis.

**Supporting Text S3.** Details about the process of searching for breeding data from the authors of long-term studies: numbers of negative replies or unsuitable data sets.

**Supporting Text S4.** Problems with species number analyzed in this study.

**Table S1.** Population identities, species names, data sources, total number of study years, first and last year of the study, number of analyzed females and clutches, number of broods, information about the status of the study area, the presence of protection of nests against predators, nest-box study, effect sizes (see Methods) and their standard errors.

**Table S2.** Akaike information criterion values for meta-regression models explaining heterogeneity in annual changes in three fitness-related traits.

**Table S3.** Meta-regression model of annual changes in production of offspring.

**Table S4.** Population identities (id pop), species names, data sources, and references describing field methods used in studies of the focal populations.

**Table S5.** List of variables used in the statistical analyzes.

**Table S6.** Acknowledgments.

**Supporting Text S1.** Details about the criteria to classify the species as single- or multi-brooded.

Because we were unable to find precise definitions of single- and multi-brooded species or populations (Svensson 1995, *Anim. Behav.* 49: 1569-1575; Dhondt 2010, *J. Ornithol.* 151: 955-957), we generated our own definition based on the frequency of second broods. A large fraction of species in our data set did not produce second broods, and populations of such species were classified as single-brooded ( $n = 155$ ). Among the remaining species, there was large variation in the mean proportion of pairs raising second broods in a year (0.06 – 83.6%), the maximum proportion of pairs raising second broods in any one year (1.2 – 96%), and the proportion of study years during which second broods were observed (3 – 100%). These three variables correlated significantly with one another, especially the first and second ( $r_s = 0.92$ ,  $p = 0.001$ ), indicating that populations with few second broods also had relatively low maximum proportion of females with second broods recorded in any one year. Consequently, we used the two first criteria to classify a population as single- or multi-brooded. A population was classified as single brooded if the mean annual proportion of females with second broods was  $< 5\%$  and the proportion of second broods never exceeded 30%. Following this definition, 29 populations were classified as multi-brooded while the remaining 172 were considered single-brooded (Table S1).

## Supporting Text S2. Sources of literature data included in the meta-analysis.

- Dragoo, D. E., G. Thomson, & M. D. Romano. 2017. Biological monitoring at Cape Lisburne, Alaska in 2017. U. S. Fish and Wildl. Serv. Report AMNWR 2017/15. Homer, Alaska.
- Drummond, B. A. & J. C. Williams. 2015. Biological monitoring in the central Aleutian Islands, Alaska in 2009-2015. U.S. Fish and Wildl. Serv. Rep., AMNWR 2015/16. Homer, Alaska
- Evans, S. A., D. J. Schultz, & N. A. Rojek. 2017. Biological monitoring at Chowiet Island, Alaska in 2017. U.S. Fish and Wildl. Serv. Rep., AMNWR 2017/18. Homer, Alaska.
- Evans, S. A., D. J. Schultz, & B. A. Drummond. 2018. Biological monitoring at Saint Lazaria Island, Alaska in 2018. U.S. Fish and Wildl. Serv. Rep., AMNWR 2018/19. Homer, Alaska.
- Hatch, S. 2017. Middleton Island Seabird Research and Monitoring. 2017. Field Report. Institute for Seabird Research and Conservation.
- Kettle, A.B. 2017. Biological monitoring at East Amatuli Island, Alaska in 2016. U.S. Fish and Wildlife Service Report, AMNWR 2017/08. Homer, Alaska
- Mong, R. N. & M. D. Romano. 2017. Biological monitoring at St. Paul Island, Alaska in 2017. U.S. Fish and Wildl. Serv. Rep., AMNWR 2017/16. Homer, Alaska.
- Morgan, D., Barth, M. & Kinloch, M. 2015. The South Australian subspecies of the glossy black-cockatoo (*Calyptorhynchus lathami halmaturinus*) Strategic Plan 2015–2020. A report by Natural Resources Kangaroo Island for the Kangaroo Island Natural Resources Management Board. Australian Government.
- Moss, R., Oswald, J. & Baines, D. 2001. Climate Change and Breeding Success: Decline of the Capercaillie in Scotland. *Journal of Animal Ecology* 70: 47–61.
- Murphy, E.C., Roseneau, D.G., Springer, A.M. & Byrd, G.V. 2016. Breeding chronology and productivity of Black-legged Kittiwakes *Rissa tridactyla* at Bluff, Alaska, 1975–2008: Associations with regional environmental indices and distant colonies. *Marine Ornithology* 44: 183–201.
- Osa, Y, Watanuki, Y. 2002. Status of Seabirds Breeding in Hokkaido. *Journal of the Yamashina Institute for Ornithology* 33: 107–141.
- Pietrzak, K. W., M. L. Mudge, S. L. Walden, & N. A. Rojek. 2017. Biological monitoring at Buldir Island, Alaska in 2017. U.S. Fish and Wildl. Serv. Rep., AMNWR 2017/17 Homer, Alaska.
- Phillips, H.J. 1985. The breeding biology of White-tailed Tropicbirds *Phaethon lepturus* at Cousin Island, Seychelles. *Ibis* 129: 10–24.
- Pollom, E. L., J. P. Gorey & M. D. Romano. 2018. Biological monitoring at St. George Island, Alaska in 2017. U.S. Fish and Wildlife Service. Rep., AMNWR 2018/01. Homer, Alaska.
- Ramos, J., Bowler, J., Betts, M., Pacheco, C., Agombar, J., Bullock, I., & Monticelli, D. 2005. Productivity of White-Tailed Tropicbird on Aride Island, Seychelles. *Waterbirds: The International Journal of Waterbird Biology* 28: 405–410.

- Ramos, J.A. & Monticelli, D. 2007. Long-term studies on productivity of Roseate Terns and Lesser Noddies on Aride Island, Seychelles. *Ostrich* 78: 443 – 447.
- Seward, A., Ratcliffe, N., Newton, S., et al. 2019. Metapopulation dynamics of roseate terns: Sources, sinks and implications for conservation management decisions. *J. Anim. Ecol.* 88: 138–153.
- Turner, D.M. 2010. Counts and breeding success of Black-legged Kittiwakes *Rissa tridactyla* nesting on man-made structures along the River Tyne, northeast England, 1994–2009. *Seabird* 23: 11–126.
- Turner, D.M. 2014. Summary of kittiwake breeding data on the River Tyne, northeast England, 2010–2013. *Birds in Northumbria 2013*: 206–208, Northumberland and Tyneside Bird Club.
- Turner, D.M. 2015. Summary of Black-legged Kittiwake *Rissa tridactyla* breeding data recorded on the River Tyne, northeast England, during 2010–2015. Natural History Society of Northumbria website ([www.nhsn.ncl.ac.uk](http://www.nhsn.ncl.ac.uk)).
- Turner, D.M. 2016. Summary of Black-legged Kittiwake *Rissa tridactyla* breeding data recorded on the River Tyne, northeast England, during 2016. Natural History Society of Northumbria website ([www.nhsn.ncl.ac.uk](http://www.nhsn.ncl.ac.uk)).
- Turner, D.M. 2017. Summary of Black-legged Kittiwake *Rissa tridactyla* breeding data recorded on the River Tyne, northeast England, during 2017. Natural History Society of Northumbria website ([www.nhsn.ncl.ac.uk](http://www.nhsn.ncl.ac.uk)).
- Watanuki, Y. & Ito, M. 2012. Climatic effects on breeding seabirds of the northern Japan Sea. *Marine Ecology Progress Series* 454: 183–196.
- Wegge, P. & Rolstad, J. 2017. Climate change and bird reproduction: warmer springs benefit breeding success in boreal forest grouse. *Proc. R. Soc. B* 284 (1866): 20171528.
- Surmacki, A., Stępniewski, J. 2007. Do weather conditions affect the dynamics of bearded tit *Panurus biarmicus* populations throughout the year? A case study from western Poland. *Ann. Zool. Fennici* 44: 35–42.
- Youngren, S. M., D. C. Rapp, and N. A. Rojek. 2018. Biological monitoring at Aiktak Island, Alaska in 2017. U.S. Fish and Wildl. Serv. Rep., AMNWR 2018/03. Homer, Alaska
- Zbyryt, A., Kapowicz, E., Kapowicz, R., Zub, K. 2016. Numbers, density and breeding success of the Lesser Spotted Eagle *Clanga pomarina* in the Knyszyn Forest (NE Poland) in 1999 – 2015. *Ornis Polonica* 57: 237–247.

**Supporting Text S3.** Details about the process of searching for breeding data from the authors of long-term studies: numbers of negative replies or unsuitable data sets.

Between October 2018 and April 2019, we contacted 313 authors of long-term studies asking them whether their data met our criteria, and whether they would like to collaborate in the meta-analysis project. When the authors replied positively, but failed to provide their data within two months, we sent them a reminder. If they responded to the reminder, but did not send the data, we sent them another reminder, and if they still failed to provide any data we did not follow up. In total: 101 authors shared their data; 37 replied positively, but did not provide data; 43 responded positively, but their data did not meet our criteria for inclusion; 106 did not reply to our contacts; 10 replied that they were not in charge of the data; and 16 would not share their data. As some authors provided data on several species, we obtained data on 87 species and 129 populations.

**Supporting Text S4.** Problems with species number analyzed in this study.

In Supporting Tables there are names of 105 species, whose data were used in this study. However, two of them: Cory's shearwater (*Calonectris borealis*) and Scopoli's shearwater (*Calonectris diomedea*) were officially separated about 10 years ago, while species lists used for constructions of phylogenetic trees are rarely updated. Because *Calonectris borealis* is not present on these lists, and all our analyses include phylogenetical corrections, they are based on 104 species.

**Table S1.** Population identities (id pop); species names; data sources (the name of the main author of dataset or citation of publication from which data were extracted; year of publication in brackets); total number of study years; first and last year of the study; number of analyzed females and clutches; number of broods (refers to classification of a population as single-brooded (1) or multi-brooded (2)); information about the status of the study area (protected – 1, non-protected – 0); the presence of protection of nests against predators (yes – 1, no – 0); nest-box study (yes – 1, no – 0); effect sizes and their standard errors (see Methods).

| id pop | Species                        | source                    | n study years | first study year | last study year | n clutches | n broods | protected area | protected nests | nest-boxes | slope  | slope SE |
|--------|--------------------------------|---------------------------|---------------|------------------|-----------------|------------|----------|----------------|-----------------|------------|--------|----------|
| 1      | <i>Accipiter cooperi</i>       | Robert N. Rosenfield      | 39            | 1980             | 2018            | 669        | 1        | 0              | 0               | 0          | 0.025  | 0.014    |
| 2      | <i>Accipiter gentilis</i>      | Jan Tøttrup Nielsen       | 41            | 1977             | 2017            | 2006       | 1        | 0              | 0               | 0          | -0.007 | 0.014    |
| 3      | <i>Accipiter gentilis</i>      | Jere Tolvanen             | 29            | 1990             | 2018            | 413        | 1        | 0              | 0               | 0          | -0.019 | 0.023    |
| 4      | <i>Accipiter nisus</i>         | Jan Tøttrup Nielsen       | 19            | 1978             | 1997            | 649        | 1        | 0              | 0               | 0          | 0.080  | 0.036    |
| 5      | <i>Acrocephalus scirpaceus</i> | Lucyna Halupka            | 14            | 1980             | 2012            | 816        | 2        | 1              | 0               | 0          | 0.053  | 0.018    |
| 6      | <i>Aegolius funereus</i>       | Markéta Zárbybnická       | 19            | 2000             | 2018            | 323        | 1        | 0              | 0               | 1          | -0.018 | 0.044    |
| 7      | <i>Aegolius funereus</i>       | Pierre-Alain Ravussin     | 32            | 1987             | 2018            | 614        | 1        | 0              | 1               | 1          | -0.003 | 0.020    |
| 8      | <i>Aegolius funereus</i>       | Erkki Korpimäki           | 21            | 1977             | 1997            | 921        | 1        | 0              | 0               | 1          | -0.062 | 0.035    |
| 9      | <i>Aethia cristatella</i>      | Pietrzak et al. (2017)    | 29            | 1988             | 2017            | 1608       | 1        | 1              | 0               | 0          | 0.008  | 0.022    |
| 10     | <i>Aethia cristatella</i>      | Elena Yu. Golubova        | 28            | 1987             | 2018            | 1576       | 1        | 1              | 0               | 0          | -0.038 | 0.019    |
| 11     | <i>Aethia psittacula</i>       | Pietrzak et al. (2017)    | 26            | 1991             | 2017            | 1223       | 1        | 1              | 0               | 0          | -0.012 | 0.026    |
| 12     | <i>Aethia psittacula</i>       | Evans et al (2017)        | 15            | 1976             | 2017            | 523        | 1        | 1              | 0               | 0          | 0.023  | 0.028    |
| 13     | <i>Aethia psittacula</i>       | Elena Yu. Golubova        | 28            | 1987             | 2018            | 1265       | 1        | 1              | 0               | 0          | -0.018 | 0.020    |
| 14     | <i>Aethia pusilla</i>          | Pietrzak et al. (2017)    | 29            | 1988             | 2017            | 1366       | 1        | 1              | 0               | 0          | 0.046  | 0.020    |
| 15     | <i>Aethia pygmaea</i>          | Pietrzak et al. (2017)    | 26            | 1991             | 2017            | 1599       | 1        | 1              | 0               | 0          | 0.036  | 0.025    |
| 16     | <i>Alca torda</i>              | Robert T. Barrett         | 21            | 1981             | 2013            | 1117       | 1        | 1              | 0               | 0          | -0.043 | 0.022    |
| 17     | <i>Alectrurus risora</i>       | Adrián S. Di Giacomo      | 15            | 2004             | 2018            | 332        | 2        | 1              | 0               | 0          | -0.057 | 0.062    |
| 18     | <i>Anous tenuirostris</i>      | Ramos & Monticelli (2007) | 15            | 1987             | 2002            | 1717       | 1        | 1              | 0               | 0          | -0.081 | 0.054    |
| 19     | <i>Apus apus</i>               | Heikki Kolunen            | 39            | 1979             | 2017            | 1092       | 1        | 0              | 0               | 1          | 0.015  | 0.014    |
| 20     | <i>Branta leucopsis</i>        | Jouke Prop                | 14            | 1978             | 2018            | 2291       | 1        | 1              | 0               | 0          | -0.047 | 0.013    |
| 21     | <i>Bucephala clangula</i>      | Hannu Pöysä               | 23            | 1995             | 2017            | 643        | 1        | 0              | 0               | 1          | -0.015 | 0.033    |
| 22     | <i>Bucorvus cafer</i>          | Kate F. Carstens          | 15            | 2001             | 2015            | 158        | 1        | 1              | 0               | 1          | -0.010 | 0.058    |
| 23     | <i>Bulweria bulwerii</i>       | Verónica C. Neves         | 12            | 2002             | 2017            | 522        | 1        | 1              | 0               | 0          | 0.196  | 0.046    |
| 24     | <i>Calonectris borealis</i>    | Joël Bried                | 12            | 1994             | 2012            | 851        | 1        | 1              | 0               | 0          | -0.014 | 0.067    |
| 25     | <i>Calonectris diomedea</i>    | Daniel Oro                | 18            | 2001             | 2018            | 2888       | 1        | 1              | 0               | 0          | 0.039  | 0.047    |
| 26     | <i>Calyptorhynchus lathami</i> | Morgan et al. (2015)      | 20            | 1995             | 2014            | 1125       | 1        | 1              | 0               | 0          | 0.017  | 0.041    |

|    | halmaturinus                       |                       |    |      |      |       |   |   |   |   |        |       |
|----|------------------------------------|-----------------------|----|------|------|-------|---|---|---|---|--------|-------|
| 27 | <i>Calyptorhynchus latirostris</i> | Denis A. Saunders     | 29 | 1970 | 2018 | 1843  | 1 | 0 | 0 | 0 | 0.002  | 0.012 |
| 28 | <i>Cerorhinca monocerata</i>       | Watanuki & Ito (2012) | 21 | 1992 | 2009 | 798   | 1 | 1 | 0 | 0 | -0.091 | 0.042 |
| 29 | <i>Cerorhinca monocerata</i>       | Evans et al (2018)    | 24 | 1994 | 2018 | 4180  | 1 | 1 | 0 | 0 | 0.114  | 0.018 |
| 30 | <i>Chroicocephalus ridibundus</i>  | Dariusz Bukaciński    | 21 | 1985 | 2018 | 5145  | 1 | 0 | 0 | 0 | -0.008 | 0.021 |
| 31 | <i>Ciconia ciconia</i>             | Andrzej Wuczyński     | 29 | 1989 | 2017 | 625   | 1 | 0 | 0 | 0 | -0.011 | 0.023 |
| 32 | <i>Ciconia ciconia</i>             | Beata Orłowska        | 19 | 1991 | 2014 | 1645  | 1 | 1 | 0 | 0 | -0.007 | 0.037 |
| 33 | <i>Ciconia ciconia</i>             | Marcin Tobolka        | 31 | 1974 | 2017 | 8690  | 1 | 0 | 0 | 0 | 0.012  | 0.013 |
| 34 | <i>Ciconia ciconia</i>             | Anna Chernomorets     | 14 | 2004 | 2018 | 288   | 1 | 0 | 0 | 0 | -0.140 | 0.050 |
| 35 | <i>Ciconia ciconia</i>             | Irina E. Samusenko    | 13 | 2004 | 2018 | 2386  | 1 | 0 | 0 | 0 | -0.171 | 0.054 |
| 36 | <i>Circus cyaneus</i>              | Alexandre Millon      | 21 | 1993 | 2017 | 1572  | 1 | 0 | 1 | 0 | -0.026 | 0.029 |
| 37 | <i>Circus pygargus</i>             | Pascal Albert         | 25 | 1993 | 2017 | 2673  | 1 | 0 | 1 | 0 | -0.003 | 0.029 |
| 38 | <i>Circus pygargus</i>             | Thierry Printemps     | 19 | 2000 | 2018 | 817   | 1 | 0 | 1 | 0 | -0.040 | 0.043 |
| 39 | <i>Circus pygargus</i>             | Jarosław Wiącek       | 16 | 1990 | 2012 | 125   | 1 | 1 | 0 | 0 | -0.124 | 0.015 |
| 40 | <i>Clanga clanga</i>               | Valery C. Dombrowski  | 12 | 2001 | 2017 | 386   | 1 | 1 | 0 | 0 | -0.052 | 0.072 |
| 41 | <i>Clanga pomarina</i>             | Zbyryt et al (2015)   | 17 | 1999 | 2015 | 360   | 1 | 1 | 0 | 0 | -0.054 | 0.051 |
| 42 | <i>Colaptes auratus</i>            | Karen L. Wiebe        | 16 | 1998 | 2013 | 2063  | 1 | 0 | 0 | 0 | -0.066 | 0.055 |
| 43 | <i>Corvus corone</i>               | Vittorio Baglione     | 16 | 1995 | 2018 | 1786  | 1 | 0 | 0 | 0 | -0.016 | 0.031 |
| 44 | <i>Cyanistes caeruleus</i>         | Jaime Potti           | 30 | 1984 | 2017 | 659   | 1 | 1 | 0 | 1 | 0.003  | 0.019 |
| 45 | <i>Cyanistes caeruleus</i>         | János Török           | 11 | 1982 | 2014 | 789   | 1 | 0 | 0 | 1 | 0.017  | 0.019 |
| 46 | <i>Cyanistes caeruleus</i>         | Jerzy Bańbura         | 11 | 2003 | 2018 | 372   | 1 | 0 | 0 | 1 | 0.064  | 0.065 |
| 47 | <i>Cyanistes caeruleus</i>         | Marcel E. Visser      | 49 | 1970 | 2018 | 2575  | 1 | 1 | 0 | 1 | -0.014 | 0.010 |
| 48 | <i>Cyanistes caeruleus</i>         | Marcel E. Visser      | 49 | 1970 | 2018 | 1144  | 1 | 1 | 0 | 1 | 0.024  | 0.010 |
| 49 | <i>Cyanistes caeruleus</i>         | Marcel E. Visser      | 48 | 1970 | 2018 | 1014  | 1 | 1 | 0 | 1 | 0.009  | 0.010 |
| 50 | <i>Cyanistes caeruleus</i>         | Marcel E. Visser      | 49 | 1970 | 2018 | 2401  | 2 | 1 | 0 | 1 | -0.008 | 0.010 |
| 51 | <i>Cygnus bewickii</i>             | Diana V. Solovyeva    | 11 | 2004 | 2018 | 256   | 1 | 0 | 0 | 0 | -0.049 | 0.089 |
| 52 | <i>Delichon urbicum</i>            | Alfonso Marzal        | 15 | 1985 | 2011 | 2004  | 2 | 0 | 0 | 0 | -0.092 | 0.026 |
| 53 | <i>Diomedea exulans</i>            | Richard A. Phillips   | 38 | 1979 | 2016 | 42403 | 1 | 0 | 0 | 0 | 0.030  | 0.015 |
| 54 | <i>Falco naumanni</i>              | Inês Catry            | 16 | 2003 | 2018 | 5499  | 1 | 1 | 0 | 0 | 0.101  | 0.058 |
| 55 | <i>Falco tinnunculus</i>           | Juan Antonio Fargallo | 23 | 1994 | 2017 | 678   | 1 | 1 | 0 | 1 | -0.048 | 0.030 |
| 56 | <i>Ficedula albicollis</i>         | Milos Krist           | 17 | 1998 | 2017 | 1292  | 1 | 0 | 1 | 1 | 0.026  | 0.040 |
| 57 | <i>Ficedula albicollis</i>         | Peter Adamík          | 18 | 2000 | 2017 | 1379  | 1 | 0 | 1 | 1 | 0.028  | 0.048 |
| 58 | <i>Ficedula albicollis</i>         | János Török           | 34 | 1982 | 2015 | 7686  | 1 | 0 | 0 | 1 | 0.063  | 0.014 |
| 59 | <i>Ficedula hypoleuca</i>          | Jaime Potti           | 33 | 1984 | 2017 | 3818  | 1 | 1 | 0 | 1 | 0.029  | 0.017 |
| 60 | <i>Ficedula hypoleuca</i>          | Tapio Eeva            | 27 | 1991 | 2017 | 3124  | 1 | 0 | 1 | 1 | 0.003  | 0.026 |
| 61 | <i>Ficedula hypoleuca</i>          | Alexander V. Artemyev | 38 | 1980 | 2017 | 3795  | 1 | 1 | 0 | 1 | -0.015 | 0.015 |

|    |                                |                        |    |      |      |      |   |   |   |   |        |       |
|----|--------------------------------|------------------------|----|------|------|------|---|---|---|---|--------|-------|
| 62 | <i>Ficedula hypoleuca</i>      | Marcel E. Visser       | 49 | 1970 | 2018 | 4238 | 1 | 1 | 0 | 1 | 0.015  | 0.010 |
| 63 | <i>Ficedula hypoleuca</i>      | E. Belskii. A. Lyakhov | 28 | 1989 | 2017 | 1617 | 1 | 0 | 0 | 1 | -0.002 | 0.024 |
| 64 | <i>Ficedula hypoleuca</i>      | Boris D. Kuranov       | 28 | 1987 | 2018 | 1843 | 1 | 0 | 0 | 1 | 0.038  | 0.020 |
| 65 | <i>Ficedula hypoleuca</i>      | Mirosława Bańbura      | 11 | 2002 | 2018 | 254  | 1 | 0 | 0 | 1 | 0.049  | 0.074 |
| 66 | <i>Ficedula hypoleuca</i>      | Indrikis Krams         | 30 | 1989 | 2018 | 1978 | 1 | 0 | 0 | 1 | -0.035 | 0.021 |
| 67 | <i>Fratercula arctica</i>      | Robert T. Barrett      | 29 | 1980 | 2013 | 1144 | 1 | 1 | 0 | 0 | -0.059 | 0.017 |
| 68 | <i>Fratercula cirrhata</i>     | Youngren et al. (2018) | 22 | 1995 | 2017 | 1398 | 1 | 1 | 0 | 0 | 0.032  | 0.032 |
| 69 | <i>Fratercula cirrhata</i>     | Pietrzak et al. (2017) | 30 | 1988 | 2017 | 707  | 1 | 1 | 0 | 0 | -0.008 | 0.022 |
| 70 | <i>Fratercula cirrhata</i>     | Evans et al (2017)     | 13 | 1976 | 2017 | 582  | 1 | 1 | 0 | 0 | 0.011  | 0.030 |
| 71 | <i>Fratercula cirrhata</i>     | Elena Yu. Golubova     | 28 | 1987 | 2018 | 1510 | 1 | 1 | 0 | 0 | -0.019 | 0.020 |
| 72 | <i>Fratercula corniculata</i>  | Youngren et al. (2018) | 16 | 1998 | 2017 | 179  | 1 | 1 | 0 | 0 | 0.043  | 0.046 |
| 73 | <i>Fratercula corniculata</i>  | Pietrzak et al. (2017) | 30 | 1988 | 2017 | 1019 | 1 | 1 | 0 | 0 | 0.019  | 0.022 |
| 74 | <i>Fratercula corniculata</i>  | Evans et al (2017)     | 15 | 1976 | 2017 | 778  | 1 | 1 | 0 | 0 | -0.013 | 0.029 |
| 75 | <i>Fratercula corniculata</i>  | Elena Yu. Golubova     | 28 | 1987 | 2018 | 2536 | 1 | 1 | 0 | 0 | -0.004 | 0.020 |
| 76 | <i>Fulmarus glacialis</i>      | Paul M. Thompson       | 48 | 1970 | 2018 | 5946 | 1 | 0 | 0 | 0 | -0.015 | 0.010 |
| 77 | <i>Gypaetus barbatus</i>       | Antoni Margalida       | 25 | 1992 | 2016 | 640  | 1 | 1 | 0 | 0 | -0.084 | 0.023 |
| 78 | <i>Gypaetus barbatus</i>       | Sonja Krüger           | 17 | 2002 | 2018 | 228  | 1 | 0 | 0 | 0 | -0.009 | 0.053 |
| 79 | <i>Haematopus bachmani</i>     | Youngren et al. (2018) | 21 | 1997 | 2017 | 251  | 1 | 1 | 0 | 0 | 0.076  | 0.033 |
| 80 | <i>Haematopus ostralegus</i>   | Martijn van de Pol     | 30 | 1984 | 2013 | 4101 | 1 | 1 | 0 | 0 | -0.058 | 0.019 |
| 81 | <i>Hirundo rustica</i>         | Anders P. Møller       | 35 | 1984 | 2018 | 4884 | 2 | 0 | 0 | 0 | -0.047 | 0.015 |
| 82 | <i>Hirundo rustica</i>         | Florentino de Lope     | 10 | 1990 | 2006 | 779  | 2 | 0 | 0 | 0 | 0.111  | 0.056 |
| 83 | <i>Jynx torquilla</i>          | Michael Schaub         | 17 | 2002 | 2018 | 588  | 2 | 0 | 0 | 1 | 0.119  | 0.043 |
| 84 | <i>Lamprotornis superbus</i>   | Dustin R. Rubenstein   | 17 | 2002 | 2018 | 1135 | 2 | 0 | 0 | 0 | -0.081 | 0.048 |
| 85 | <i>Larus canus</i>             | Monika Bukacińska      | 23 | 1983 | 2018 | 5666 | 1 | 0 | 0 | 0 | -0.052 | 0.015 |
| 86 | <i>Larus crassirostris</i>     | Watanuki & Ito (2012)  | 21 | 1992 | 2009 | 1407 | 1 | 1 | 0 | 0 | 0.070  | 0.051 |
| 87 | <i>Larus glaucescens</i>       | Youngren et al. (2018) | 23 | 1995 | 2017 | 2579 | 1 | 1 | 0 | 0 | -0.075 | 0.029 |
| 88 | <i>Larus glaucescens</i>       | Pietrzak et al. (2017) | 20 | 1997 | 2017 | 754  | 1 | 1 | 0 | 0 | 0.029  | 0.039 |
| 89 | <i>Larus glaucescens</i>       | Evans et al (2017)     | 15 | 1998 | 2017 | 2397 | 1 | 1 | 0 | 0 | 0.100  | 0.044 |
| 90 | <i>Larus glaucescens</i>       | Evans et al (2018)     | 24 | 1994 | 2018 | 2162 | 1 | 1 | 0 | 0 | -0.027 | 0.030 |
| 91 | <i>Macronectes giganteus</i>   | Andrew G. Wood         | 17 | 1978 | 2017 | 3918 | 1 | 0 | 0 | 0 | -0.050 | 0.014 |
| 92 | <i>Macronectes halli</i>       | Andrew G. Wood         | 17 | 1978 | 2017 | 7353 | 1 | 0 | 0 | 0 | -0.045 | 0.015 |
| 93 | <i>Malurus elegans</i>         | Lyanne Brouwer         | 18 | 1980 | 2018 | 1226 | 2 | 1 | 0 | 0 | -0.060 | 0.008 |
| 94 | <i>Margarops fuscatus</i>      | Wayne J. Arendt        | 19 | 1979 | 2000 | 998  | 2 | 1 | 0 | 1 | -0.08  | 0.03  |
| 95 | <i>Melanerpes formicivorus</i> | Walter D. Koenig       | 39 | 1980 | 2017 | 1133 | 2 | 1 | 0 | 0 | 0.027  | 0.015 |
| 96 | <i>Mergus squamatus</i>        | Diana V. Solovyeva     | 15 | 2004 | 2018 | 194  | 1 | 0 | 0 | 1 | -0.026 | 0.064 |
| 97 | <i>Milvus migrans</i>          | Fabrizio Sergio        | 16 | 1989 | 2013 | 650  | 1 | 1 | 0 | 0 | -0.003 | 0.034 |



|     |                                  |                            |    |      |      |       |   |   |   |   |        |       |
|-----|----------------------------------|----------------------------|----|------|------|-------|---|---|---|---|--------|-------|
| 98  | <i>Oceanodroma furcata</i>       | Youngren et al. (2018)     | 18 | 1995 | 2017 | 795   | 1 | 1 | 0 | 0 | -0.044 | 0.039 |
| 99  | <i>Oceanodroma furcata</i>       | Pietrzak et al. (2017)     | 32 | 1974 | 2017 | 1790  | 1 | 1 | 0 | 0 | 0.011  | 0.016 |
| 100 | <i>Oceanodroma furcata</i>       | Kettle (2017)              | 17 | 1998 | 2016 | 1519  | 1 | 1 | 0 | 0 | 0.125  | 0.037 |
| 101 | <i>Oceanodroma furcata</i>       | Evans et al (2018)         | 23 | 1995 | 2018 | 2809  | 1 | 1 | 0 | 0 | 0.027  | 0.032 |
| 102 | <i>Oceanodroma furcata</i>       | Drummond & Williams (2015) | 15 | 1996 | 2015 | 594   | 1 | 1 | 0 | 0 | 0.010  | 0.053 |
| 103 | <i>Oceanodroma leucorhoa</i>     | Youngren et al. (2018)     | 18 | 1995 | 2017 | 1332  | 1 | 1 | 0 | 0 | 0.019  | 0.041 |
| 104 | <i>Oceanodroma leucorhoa</i>     | Pietrzak et al. (2017)     | 32 | 1974 | 2017 | 1859  | 1 | 1 | 0 | 0 | 0.057  | 0.012 |
| 105 | <i>Oceanodroma leucorhoa</i>     | Evans et al (2018)         | 23 | 1995 | 2018 | 2141  | 1 | 1 | 0 | 0 | -0.001 | 0.032 |
| 106 | <i>Oceanodroma monteiroi</i>     | Mark Bolton                | 19 | 2000 | 2018 | 985   | 1 | 1 | 0 | 1 | -0.065 | 0.041 |
| 107 | <i>Oenanthe oenanthe</i>         | Debora Arlt                | 26 | 1993 | 2018 | 1390  | 1 | 0 | 0 | 0 | -0.015 | 0.027 |
| 108 | <i>Pachyptila belcheri</i>       | Petra Quillfeldt           | 10 | 2002 | 2018 | 748   | 1 | 1 | 0 | 0 | -0.042 | 0.064 |
| 109 | <i>Panurus biarmicus</i>         | Janusz Stepniewski         | 10 | 1988 | 2018 | 242   | 2 | 0 | 0 | 0 | 0.027  | 0.028 |
| 110 | <i>Parus major</i>               | Marcel E. Visser           | 49 | 1970 | 2018 | 7749  | 2 | 1 | 0 | 1 | -0.026 | 0.010 |
| 111 | <i>Parus major</i>               | Marcel E. Visser           | 49 | 1970 | 2018 | 2419  | 2 | 1 | 0 | 1 | -0.011 | 0.010 |
| 112 | <i>Parus major</i>               | Marcel E. Visser           | 49 | 1970 | 2018 | 2538  | 2 | 1 | 0 | 1 | -0.030 | 0.009 |
| 113 | <i>Parus major</i>               | Marcel E. Visser           | 49 | 1970 | 2018 | 9344  | 2 | 1 | 0 | 1 | -0.032 | 0.009 |
| 114 | <i>Parus major</i>               | Juan C. Senar              | 21 | 1998 | 2018 | 928   | 2 | 1 | 1 | 1 | 0.062  | 0.035 |
| 115 | <i>Parus major</i>               | Emilio Barba               | 23 | 1993 | 2015 | 2677  | 2 | 0 | 0 | 1 | 0.076  | 0.028 |
| 116 | <i>Parus major</i>               | János Török                | 33 | 1982 | 2014 | 1509  | 1 | 0 | 0 | 1 | 0.043  | 0.017 |
| 117 | <i>Parus major</i>               | Indrikis Krams             | 30 | 1989 | 2018 | 2426  | 2 | 0 | 0 | 1 | 0.012  | 0.022 |
| 118 | <i>Passer domesticus</i>         | David F. Westneat          | 26 | 1993 | 2018 | 4674  | 2 | 0 | 1 | 1 | -0.042 | 0.026 |
| 119 | <i>Passerculus sandwichensis</i> | Nathaniel T. Wheelwright   | 19 | 1987 | 2005 | 1678  | 2 | 1 | 0 | 0 | -0.017 | 0.048 |
| 120 | <i>Perisoreus infaustus</i>      | Michael Griesser           | 18 | 1990 | 2013 | 503   | 1 | 0 | 0 | 0 | 0.045  | 0.037 |
| 121 | <i>Phaethon lepturus</i>         | Ramos et al. (2005)        | 10 | 1989 | 2002 | 661   | 1 | 1 | 0 | 0 | 0.027  | 0.078 |
| 122 | <i>Phalacrocorax auritus</i>     | Youngren et al. (2018)     | 12 | 2000 | 2017 | 206   | 1 | 1 | 0 | 0 | -0.040 | 0.064 |
| 123 | <i>Phalacrocorax capillatus</i>  | Watanuki & Ito (2012)      | 21 | 1992 | 2009 | 924   | 1 | 1 | 0 | 0 | -0.059 | 0.046 |
| 124 | <i>Phalacrocorax pelagicus</i>   | Youngren et al. (2018)     | 16 | 1995 | 2017 | 400   | 1 | 1 | 0 | 0 | -0.051 | 0.038 |
| 125 | <i>Phalacrocorax pelagicus</i>   | Pietrzak et al. (2017)     | 26 | 1974 | 2017 | 1227  | 1 | 1 | 0 | 0 | 0.019  | 0.023 |
| 126 | <i>Phalacrocorax pelagicus</i>   | Evans et al (2018)         | 22 | 1995 | 2016 | 2610  | 1 | 1 | 0 | 0 | -0.066 | 0.032 |
| 127 | <i>Phalacrocorax pelagicus</i>   | Hatch (2017)               | 16 | 2002 | 2017 | 1440  | 1 | 1 | 0 | 0 | -0.044 | 0.057 |
| 128 | <i>Phalacrocorax urile</i>       | Youngren et al. (2018)     | 13 | 1997 | 2017 | 828   | 1 | 1 | 0 | 0 | -0.024 | 0.052 |
| 129 | <i>Phalacrocorax urile</i>       | Pollom et al. (2018)       | 18 | 2000 | 2017 | 903   | 1 | 1 | 0 | 0 | -0.066 | 0.045 |
| 130 | <i>Phalacrocorax urile</i>       | Mong et al. (2017)         | 33 | 1975 | 2017 | 2071  | 1 | 1 | 0 | 0 | 0.017  | 0.014 |
| 131 | <i>Phalacrocorax urile</i>       | Drummond & Williams (2015) | 12 | 1997 | 2015 | 482   | 1 | 1 | 0 | 0 | -0.017 | 0.063 |
| 132 | <i>Philetairus socius</i>        | Rita Covas                 | 10 | 1999 | 2017 | 4683  | 2 | 1 | 0 | 0 | 0.020  | 0.059 |
| 133 | <i>Phoebastria immutabilis</i>   | Donald C. Dearborn         | 19 | 1980 | 1998 | 22871 | 1 | 1 | 0 | 0 | 0.019  | 0.044 |

|     |                                |                            |    |      |      |       |   |   |   |   |        |       |
|-----|--------------------------------|----------------------------|----|------|------|-------|---|---|---|---|--------|-------|
| 134 | <i>Phoebastria nigripes</i>    | Donald C. Dearborn         | 18 | 1981 | 1998 | 11464 | 1 | 1 | 0 | 0 | 0.103  | 0.041 |
| 135 | <i>Phoenicurus phoenicurus</i> | Jiří Porkert               | 15 | 1994 | 2014 | 267   | 2 | 0 | 0 | 1 | -0.018 | 0.044 |
| 136 | <i>Phoenicurus phoenicurus</i> | Sergey I. Gashkov          | 24 | 1995 | 2018 | 383   | 1 | 0 | 0 | 1 | 0.032  | 0.030 |
| 137 | <i>Plectrophenax nivalis</i>   | Yngve Espmark              | 16 | 1998 | 2013 | 1273  | 1 | 0 | 0 | 0 | 0.058  | 0.056 |
| 138 | <i>Podiceps grisegena</i>      | Janusz Kloskowski          | 19 | 1996 | 2014 | 435   | 1 | 0 | 0 | 0 | 0.075  | 0.040 |
| 139 | <i>Protonotaria citrea</i>     | Jeffrey P. Hoover          | 19 | 1994 | 2012 | 6969  | 2 | 1 | 0 | 1 | 0.056  | 0.042 |
| 140 | <i>Protonotaria citrea</i>     | Lesley Bulluck             | 23 | 1995 | 2017 | 3286  | 2 | 0 | 0 | 1 | 0.064  | 0.030 |
| 141 | <i>Pygoscelis adeliae</i>      | Louise M. Emmerson         | 19 | 1990 | 2008 | 37093 | 1 | 1 | 0 | 0 | -0.073 | 0.041 |
| 142 | <i>Pygoscelis adeliae</i>      | Michael J. Dunn            | 22 | 1996 | 2018 | 35489 | 1 | 1 | 0 | 0 | 0.033  | 0.034 |
| 143 | <i>Pygoscelis antarcticus</i>  | Małgorzata Korczak-Abshire | 17 | 1977 | 2017 | 7634  | 1 | 1 | 0 | 0 | -0.003 | 0.021 |
| 144 | <i>Rissa brevirostris</i>      | Pietrzak et al. (2017)     | 30 | 1988 | 2017 | 3197  | 1 | 1 | 0 | 0 | 0.015  | 0.022 |
| 145 | <i>Rissa brevirostris</i>      | Pollom et al. (2018)       | 35 | 1981 | 2017 | 18534 | 1 | 1 | 0 | 0 | -0.004 | 0.017 |
| 146 | <i>Rissa brevirostris</i>      | Mong et al. (2017)         | 35 | 1975 | 2017 | 1385  | 1 | 1 | 0 | 0 | 0.023  | 0.020 |
| 147 | <i>Rissa tridactyla</i>        | Turner (2010, 2016, 2017)  | 17 | 2000 | 2017 | 15408 | 1 | 0 | 0 | 0 | 0.010  | 0.048 |
| 148 | <i>Rissa tridactyla</i>        | Robert T. Barrett          | 30 | 1980 | 2013 | 42202 | 1 | 1 | 0 | 0 | -0.058 | 0.017 |
| 149 | <i>Rissa tridactyla</i>        | Mong et al. (2017)         | 35 | 1975 | 2017 | 11528 | 1 | 1 | 0 | 0 | -0.021 | 0.013 |
| 150 | <i>Rissa tridactyla</i>        | Murphy et al. (2016)       | 31 | 1975 | 2008 | 5065  | 1 | 1 | 0 | 0 | -0.008 | 0.018 |
| 151 | <i>Rissa tridactyla</i>        | Pietrzak et al. (2017)     | 30 | 1988 | 2017 | 9894  | 1 | 1 | 0 | 0 | 0.006  | 0.022 |
| 152 | <i>Rissa tridactyla</i>        | Dragoo et al. (2017)       | 23 | 1983 | 2017 | 3811  | 1 | 1 | 0 | 0 | -0.032 | 0.025 |
| 153 | <i>Rissa tridactyla</i>        | Evans et al (2017)         | 22 | 1979 | 2017 | 5015  | 1 | 1 | 0 | 0 | -0.016 | 0.018 |
| 154 | <i>Rissa tridactyla</i>        | Kettle (2017)              | 22 | 1993 | 2016 | 7382  | 1 | 1 | 0 | 0 | -0.066 | 0.032 |
| 155 | <i>Rissa tridactyla</i>        | Pollom et al. (2018)       | 35 | 1981 | 2017 | 8654  | 1 | 1 | 0 | 0 | 0.005  | 0.017 |
| 156 | <i>Rissa tridactyla</i>        | Hatch (2017)               | 22 | 1996 | 2017 | 2958  | 1 | 1 | 0 | 0 | -0.027 | 0.035 |
| 157 | <i>Rissa tridactyla</i>        | Elena Yu. Golubova         | 28 | 1988 | 2018 | 3085  | 1 | 1 | 0 | 0 | -0.055 | 0.019 |
| 158 | <i>Rissa tridactyla</i>        | Drummond & Williams (2015) | 12 | 1996 | 2010 | 4359  | 1 | 1 | 0 | 0 | 0.042  | 0.076 |
| 159 | <i>Somateria fischeri</i>      | Diana V. Solovyeva         | 16 | 2002 | 2018 | 1088  | 1 | 0 | 0 | 0 | -0.090 | 0.048 |
| 160 | <i>Somateria mollissima</i>    | Markus Öst                 | 15 | 2002 | 2018 | 3367  | 1 | 1 | 0 | 0 | -0.113 | 0.054 |
| 161 | <i>Sterna dougallii</i>        | Seward et al (2018)        | 25 | 1992 | 2016 | 1552  | 1 | 1 | 0 | 0 | -0.017 | 0.029 |
| 162 | <i>Sterna dougallii</i>        | Seward et al (2018)        | 25 | 1992 | 2016 | 5672  | 1 | 1 | 0 | 0 | -0.079 | 0.024 |
| 163 | <i>Sterna dougallii</i>        | Seward et al (2018)        | 20 | 1992 | 2016 | 1876  | 1 | 1 | 0 | 0 | 0.007  | 0.033 |
| 164 | <i>Sterna dougallii</i>        | Jaime A. Ramos             | 21 | 1987 | 2010 | 8144  | 1 | 1 | 0 | 0 | 0.006  | 0.035 |
| 165 | <i>Sterna hirundo</i>          | Peter H. Becker            | 26 | 1992 | 2017 | 4077  | 1 | 1 | 1 | 0 | -0.051 | 0.025 |
| 166 | <i>Strix aluco</i>             | Tapio Solonen              | 25 | 1988 | 2017 | 605   | 1 | 0 | 0 | 1 | 0.024  | 0.024 |
| 167 | <i>Strix aluco</i>             | Patrik Karell              | 40 | 1979 | 2018 | 1025  | 1 | 0 | 0 | 1 | -0.022 | 0.014 |
| 168 | <i>Strix aluco</i>             | Xavier Lambin              | 31 | 1980 | 2010 | 1106  | 1 | 0 | 0 | 1 | -0.008 | 0.021 |
| 169 | <i>Strix uralensis</i>         | Hannu Pietiäinen           | 41 | 1977 | 2017 | 1798  | 1 | 0 | 0 | 1 | 0.009  | 0.013 |

|     |                                  |                          |    |      |      |       |   |   |   |   |        |       |
|-----|----------------------------------|--------------------------|----|------|------|-------|---|---|---|---|--------|-------|
| 170 | <i>Sturnus unicolor</i>          | Vicente Polo             | 17 | 2001 | 2017 | 1216  | 2 | 1 | 0 | 1 | 0.021  | 0.052 |
| 171 | <i>Sturnus vulgaris</i>          | Alexander Numerov        | 20 | 1990 | 2017 | 337   | 1 | 0 | 0 | 1 | 0.017  | 0.030 |
| 172 | <i>Sula neboxii</i>              | Hugh Drummond            | 26 | 1993 | 2018 | 22221 | 1 | 1 | 0 | 0 | -0.052 | 0.025 |
| 173 | <i>Synthliboramphus antiquus</i> | Youngren et al. (2018)   | 27 | 1997 | 2017 | 1201  | 1 | 1 | 0 | 0 | 0.079  | 0.033 |
| 174 | <i>Synthliboramphus antiquus</i> | Elena Yu. Golubova       | 27 | 1988 | 2018 | 1932  | 1 | 1 | 0 | 0 | 0.044  | 0.022 |
| 175 | <i>Tachycineta bicolor</i>       | Michael P. Lombardo      | 27 | 1992 | 2018 | 1689  | 1 | 0 | 1 | 1 | 0.003  | 0.026 |
| 176 | <i>Tachycineta bicolor</i>       | Nathaniel T. Wheelwright | 20 | 1987 | 2006 | 885   | 1 | 1 | 0 | 1 | 0.005  | 0.041 |
| 177 | <i>Tachymarptis melba</i>        | Pierre Bize              | 20 | 1999 | 2018 | 948   | 1 | 0 | 1 | 0 | 0.016  | 0.041 |
| 178 | <i>Tachymarptis melba</i>        | Pierre Bize              | 19 | 2000 | 2018 | 1445  | 1 | 0 | 1 | 0 | -0.027 | 0.044 |
| 179 | <i>Tetrao tetrix</i>             | Wegge & Rolstad (2017)   | 38 | 1979 | 2016 | 842   | 1 | 0 | 0 | 0 | 0.032  | 0.014 |
| 180 | <i>Tetrao urogallus</i>          | Wegge & Rolstad (2017)   | 38 | 1979 | 2016 | 1018  | 1 | 0 | 0 | 0 | 0.034  | 0.014 |
| 181 | <i>Tetrao urogallus</i>          | Moss et al. (2001)       | 24 | 1975 | 1998 | 320   | 1 | 0 | 0 | 0 | -0.095 | 0.023 |
| 182 | <i>Thalassarche chrysostoma</i>  | Richard A. Phillips      | 28 | 1989 | 2016 | 4954  | 1 | 0 | 0 | 0 | -0.028 | 0.024 |
| 183 | <i>Thalassarche melanophris</i>  | Richard A. Phillips      | 35 | 1983 | 2017 | 11941 | 1 | 0 | 0 | 0 | 0.005  | 0.018 |
| 184 | <i>Troglodytes aedon</i>         | E. Keith Bowers          | 39 | 1980 | 2018 | 13418 | 2 | 1 | 1 | 1 | 0.014  | 0.014 |
| 185 | <i>Turdus merula</i>             | Dariusz Wysocki          | 21 | 1997 | 2017 | 2320  | 2 | 0 | 0 | 0 | -0.031 | 0.037 |
| 186 | <i>Tyto alba</i>                 | Alexandre Roulin         | 28 | 1990 | 2017 | 1564  | 2 | 0 | 0 | 1 | 0.033  | 0.023 |
| 187 | <i>Tyto alba</i>                 | Motti Charter            | 15 | 2002 | 2016 | 1878  | 1 | 0 | 0 | 1 | -0.072 | 0.061 |
| 188 | <i>Uria aalge</i>                | Mike P. Harris           | 36 | 1982 | 2017 | 28649 | 1 | 1 | 0 | 0 | -0.035 | 0.015 |
| 189 | <i>Uria aalge</i>                | Mong et al. (2017)       | 31 | 1976 | 2017 | 3765  | 1 | 1 | 0 | 0 | -0.039 | 0.015 |
| 190 | <i>Uria aalge</i>                | Youngren et al. (2018)   | 22 | 1995 | 2017 | 805   | 1 | 1 | 0 | 0 | -0.028 | 0.033 |
| 191 | <i>Uria aalge</i>                | Evans et al (2017)       | 22 | 1979 | 2017 | 4765  | 1 | 1 | 0 | 0 | -0.024 | 0.018 |
| 192 | <i>Uria aalge</i>                | Evans et al (2018)       | 24 | 1994 | 2018 | 1650  | 1 | 1 | 0 | 0 | -0.018 | 0.030 |
| 193 | <i>Uria aalge</i>                | Pollom et al. (2018)     | 34 | 1978 | 2017 | 3366  | 1 | 1 | 0 | 0 | -0.033 | 0.016 |
| 194 | <i>Uria aalge</i>                | Elena Yu. Golubova       | 21 | 1987 | 2018 | 4411  | 1 | 1 | 0 | 0 | -0.029 | 0.027 |
| 195 | <i>Uria lomvia</i>               | Pollom et al. (2018)     | 35 | 1981 | 2017 | 21764 | 1 | 1 | 0 | 0 | -0.049 | 0.015 |
| 196 | <i>Uria lomvia</i>               | Mong et al. (2017)       | 33 | 1976 | 2017 | 11065 | 1 | 1 | 0 | 0 | -0.025 | 0.014 |
| 197 | <i>Uria lomvia</i>               | Youngren et al. (2018)   | 22 | 1995 | 2017 | 500   | 1 | 1 | 0 | 0 | -0.053 | 0.031 |
| 198 | <i>Uria lomvia</i>               | Pietrzak et al. (2017)   | 30 | 1988 | 2017 | 7625  | 1 | 1 | 0 | 0 | -0.070 | 0.017 |
| 199 | <i>Uria lomvia</i>               | Evans et al (2017)       | 22 | 1979 | 2017 | 2699  | 1 | 1 | 0 | 0 | -0.031 | 0.017 |
| 200 | <i>Uria lomvia</i>               | Evans et al (2018)       | 24 | 1994 | 2018 | 949   | 1 | 1 | 0 | 0 | 0.005  | 0.030 |
| 201 | <i>Uria lomvia</i>               | Elena Yu. Golubova       | 21 | 1987 | 2018 | 1436  | 1 | 1 | 0 | 0 | -0.012 | 0.027 |

**Table S2.** Akaike information criterion values for meta-regression models explaining heterogeneity in annual changes in three fitness-related traits. In all models, phylogenetic correlations between species and population and species identifiers were included as random factors. Each model includes the same set of fixed predictor variables: *ln* body mass, number of broods, migratory habits, and the change in local temperature. Additionally, models included all possible interactions between predictor variables (up to four-way) or two-way interactions with the change in local temperature over five periods of the breeding season. The best model for each examined trait is shown in bold; we arbitrarily selected the model of changes in clutch size with temperatures in egg-laying period as the best.

| Model                               | Pre-laying | Egg laying  | Egg laying & incubation | Nestling    | Whole season |
|-------------------------------------|------------|-------------|-------------------------|-------------|--------------|
| Changes in productivity             |            |             |                         |             |              |
| All possible interactions           | -573       | -576        | -580                    | -590        | -585         |
| All two-way interactions with temp. | -618       | -615        | -617                    | <b>-622</b> | -619         |
| Changes in clutch size              |            |             |                         |             |              |
| All possible interactions           | -267       | -270        | -265                    | -285        | -269         |
| All two-way interactions with temp. | -312       | <b>-315</b> | -310                    | -315        | -311         |
| Changes in nest success             |            |             |                         |             |              |
| All possible interactions           | 370        | 371         | 376                     | 369         | 369          |
| All two-way interactions with temp. | <b>360</b> | 374         | 373                     | 369         | 370          |

**Table S3.** Meta-regression model of annual changes in offspring production. This model is similar to the model listed in the left section of Table 2, and the only change is the addition of a new fixed predictor: nest boxes (binary: 0 = birds used natural nest sites, 1 = birds nested in nest-boxes). Beta coefficients whose 95% confidence limits (c.l.) do not include zero are shown in bold.

| Term                                        | Beta coefficients and their confidence intervals |               |               |
|---------------------------------------------|--------------------------------------------------|---------------|---------------|
| Intercept                                   | 0.005                                            | -0.044        | 0.053         |
| Log(body mass)                              | -0.004                                           | -0.010        | 0.003         |
| Migratory habits (sedentary vs migratory)   | 0.011                                            | -0.011        | 0.033         |
| Number of broods (single- vs multi-brooded) | -0.021                                           | -0.056        | 0.014         |
| Nest boxes (yes = 1)                        | -0.003                                           | -0.022        | 0.016         |
| Change in temperature                       | <b>1.276</b>                                     | <b>0.263</b>  | <b>2.289</b>  |
| Log (body mass) x change in temperature     | <b>-0.141</b>                                    | <b>-0.274</b> | <b>-0.008</b> |
| Migratory habits x change in temperature    | <b>-0.624</b>                                    | <b>-1.180</b> | <b>-0.068</b> |
| Number of broods x change in temperature    | 0.003                                            | -0.732        | 0.737         |

**Table S4.** Population identities (id pop), species names, data sources (the name of the main author of dataset or citation of publication from which data were extracted, year of publication in brackets), and references describing field methods used in studies of the focal populations (or text, if references in English are not available).

| id pop | Species                        | source               | references                                                                                                                                                                                                                                                                                                                                                                                                                                                                                                                                                                                                                                                                                                                                                                                                                                                                                     |
|--------|--------------------------------|----------------------|------------------------------------------------------------------------------------------------------------------------------------------------------------------------------------------------------------------------------------------------------------------------------------------------------------------------------------------------------------------------------------------------------------------------------------------------------------------------------------------------------------------------------------------------------------------------------------------------------------------------------------------------------------------------------------------------------------------------------------------------------------------------------------------------------------------------------------------------------------------------------------------------|
| 1      | <i>Accipiter cooperi</i>       | Robert N. Rosenfield | Rosenfield, R.N., W.E. Stout, M.D. Giovanni, N.H. Levine, J.A. Cava, M.G. Hardin & T.G. Haynes, T.G. 2015. Does breeding population trajectory and age of nesting females influence disparate nestling sex ratios in two populations of Cooper's Hawks. <i>Ecology and Evolution</i> 5: 4037–4048.<br>Rosenfield, R.N., J. Bielefeldt, T.L. Booms, J.A. Cava, and M.A. Bozek. 2013. Life-history trade-offs of breeding in one-year-old male Cooper's Hawks. <i>Condor</i> 115: 306–315.                                                                                                                                                                                                                                                                                                                                                                                                       |
| 2      | <i>Accipiter gentilis</i>      | Jan Tøttrup Nielsen  | Herfindal, I., van de Pol, M., Nielsen, J. T., Sæther, B.-E. & Møller, A. P. 2015: Climatic conditions cause complex patterns of covariation between demographic traits in a long-lived raptor. <i>J. Anim. Ecol.</i> 84:702-711.<br>Nielsen, J.T. & J. Drachmann 1999: Development and productivity in a Danish Goshawk <i>Accipiter gentilis</i> population. <i>Dansk Orn. Foren. Tidsskr.</i> 93: 153–161.                                                                                                                                                                                                                                                                                                                                                                                                                                                                                  |
| 3      | <i>Accipiter gentilis</i>      | Jere Tolvanen        | Tolvanen et al. 2017 Apparent survival, territory turnover and site fidelity rates in Northern Goshawk <i>Accipiter gentilis</i> populations close to the northern range limit. <i>Bird Study</i> 64:168–177.<br>Steenhof & Newton 2007 Assessing nesting success and productivity. In: Bird, D.M. & Bildstein, K.L. (eds) <i>Raptor Research and Management Techniques</i> , 181–192. Raptor Research Foundation, Hancock House Publishers, Blaine.; <a href="https://raptorresearchfoundation.org/wp-content/uploads/2021/11/Chapter-11.pdf">https://raptorresearchfoundation.org/wp-content/uploads/2021/11/Chapter-11.pdf</a> .<br>Fledgling numbers were based on the number of ringed chicks (ringing age usually 20-34 days old, after which losses are very rare). Nest climbs/checks are not possible at later stage of the nestling period to avoid premature fledging of the young. |
| 4      | <i>Accipiter nisus</i>         | Jan Tøttrup Nielsen  | Herfindal, I., van de Pol, M., Nielsen, J. T., Sæther, B.-E. & Møller, A. P. 2015: Climatic conditions cause complex patterns of covariation between demographic traits in a long-lived raptor. <i>J. Anim. Ecol.</i> 84:702-711.<br>Nielsen, J.T. & J. Drachmann 1999: Development and productivity in a Danish Goshawk <i>Accipiter gentilis</i> population. <i>Dansk Orn. Foren. Tidsskr.</i> 93: 153–161.                                                                                                                                                                                                                                                                                                                                                                                                                                                                                  |
| 5      | <i>Acrocephalus scirpaceus</i> | Lucyna Halupka       | Halupka, L., Borowiec, M., Neubauer, G., & Halupka, K. 2021. Fitness consequences of longer breeding seasons of a migratory passerine under changing climatic conditions. <i>Journal of Animal Ecology</i> 90: 1655–1665.<br>Hałupka L., Dyrz A., Borowiec M. 2008. Climate change affects breeding of reed warblers <i>Acrocephalus scirpaceus</i> . <i>Journal of Avian Biology</i> 39: 95–100.                                                                                                                                                                                                                                                                                                                                                                                                                                                                                              |
| 6      | <i>Aegolius funereus</i>       | Markéta Zárýbnická   | Zárýbnická M., Sedláček O., Salo P., Šťastný K., Korpimäki E. 2015. Reproductive responses of temperate and boreal Tengmalm's Owl <i>Aegolius funereus</i> populations to spatial and temporal variation in prey availability. <i>Ibis</i> 157: 369–383.                                                                                                                                                                                                                                                                                                                                                                                                                                                                                                                                                                                                                                       |

|    |                           |                        |                                                                                                                                                                                                                                                                                                                                                                                                                                                                                                                                                                                                                                                                                                                                                                                                                                                                                                                                                                                                                                                                                    |
|----|---------------------------|------------------------|------------------------------------------------------------------------------------------------------------------------------------------------------------------------------------------------------------------------------------------------------------------------------------------------------------------------------------------------------------------------------------------------------------------------------------------------------------------------------------------------------------------------------------------------------------------------------------------------------------------------------------------------------------------------------------------------------------------------------------------------------------------------------------------------------------------------------------------------------------------------------------------------------------------------------------------------------------------------------------------------------------------------------------------------------------------------------------|
|    |                           |                        | Zárybnická M., Korpimäki E., Griesser M. 2012. Dark or Short Nights: Differential Latitudinal Constraints in Nestling Provisioning Patterns of a Nocturnally Hunting Bird Species. PLoS ONE 7(5): e36932.                                                                                                                                                                                                                                                                                                                                                                                                                                                                                                                                                                                                                                                                                                                                                                                                                                                                          |
| 7  | <i>Aegolius funereus</i>  | Pierre-Alain Ravussin  | Ravussin, P.-A., D. Trollet, L. Willenegger & D. Béguin (1993) Observations sur les fluctuations d'une population de Chouettes de Tengmalm ( <i>Aegolius funereus</i> ) dans le Jura vaudois (Suisse). Nos Oiseaux 42: 127-142.<br>Nests in natural cavities were found after nocturnal listening every year during the period of over 40 years. Furthermore, nesting boxes were installed by us in the most suitable environments. Occupied nests are visited between 3 and 5 times, in order to determine the date of laying, clutch size, number of eggs hatched and number of young fledged. Females and young, and sometimes males, are ringed. The young from natural cavities are ringed when they are about 25 days old, i.e. about 7-10 days before fledging, and there is no subsequent monitoring. Cases of possible predation between banding and fledging are not known. In the case of nest boxes, observation and sampling of the nest remnants after the young have fledged makes it possible to determine breeding success and the exact number of young fledged. |
| 8  | <i>Aegolius funereus</i>  | Erkki Korpimäki        | Korpimäki, E. & Hakkarainen, H. 1991. Fluctuating food supply affects the clutch size of Tengmalm's Owl independent of laying date. Oecologia 85: 543–552.<br>Hakkarainen, H., Mykrä, S., Kurki, S., Korpimäki, E., Nikula, A. & Koivunen, V. 2003. Habitat composition as a determinant of reproductive success of Tengmalm's owls under fluctuating food conditions. Oikos 100:162–171.                                                                                                                                                                                                                                                                                                                                                                                                                                                                                                                                                                                                                                                                                          |
| 9  | <i>Aethia cristatella</i> | Pietrzak et al. (2017) | Pietrzak, K. W., M. L. Mudge, S. L. Walden, & N. A. Rojek. 2017. Biological monitoring at Buldir Island, Alaska in 2017. U.S. Fish and Wildl. Serv. Rep., AMNWR 2017/17 Homer, Alaska.                                                                                                                                                                                                                                                                                                                                                                                                                                                                                                                                                                                                                                                                                                                                                                                                                                                                                             |
| 10 | <i>Aethia cristatella</i> | Elena Yu. Golubova     | Golubova E. Yu. 2021. Breeding Biology of the Crested Auklet ( <i>Aethia cristatella</i> , Alcidae, Charadriiformes) in the Northern Part of the Sea of Okhotsk. Biology Bulletin 48: 1541–1562.                                                                                                                                                                                                                                                                                                                                                                                                                                                                                                                                                                                                                                                                                                                                                                                                                                                                                   |
| 11 | <i>Aethia psittacula</i>  | Pietrzak et al. (2017) | Pietrzak, K. W., M. L. Mudge, S. L. Walden, & N. A. Rojek. 2017. Biological monitoring at Buldir Island, Alaska in 2017. U.S. Fish and Wildl. Serv. Rep., AMNWR 2017/17 Homer, Alaska.                                                                                                                                                                                                                                                                                                                                                                                                                                                                                                                                                                                                                                                                                                                                                                                                                                                                                             |
| 12 | <i>Aethia psittacula</i>  | Evans et al (2017)     | Evans, S. A., D. J. Schultz, & N. A. Rojek. 2017. Biological monitoring at Chowiet Island, Alaska in 2017. U.S. Fish and Wildl. Serv. Rep., AMNWR 2017/18. Homer, Alaska.                                                                                                                                                                                                                                                                                                                                                                                                                                                                                                                                                                                                                                                                                                                                                                                                                                                                                                          |
| 13 | <i>Aethia psittacula</i>  | Elena Yu. Golubova     | Golubova E. Yu. 2017. Breeding Biology of the Parakeet Auklet ( <i>Cyclorhynchus psittacula</i> ) on Talan Island (Northern Sea of Okhotsk). Biology Bulletin 44, No. 7. Pp. 735–750.                                                                                                                                                                                                                                                                                                                                                                                                                                                                                                                                                                                                                                                                                                                                                                                                                                                                                              |
| 14 | <i>Aethia pusilla</i>     | Pietrzak et al. (2017) | Pietrzak, K. W., M. L. Mudge, S. L. Walden, & N. A. Rojek. 2017. Biological monitoring at Buldir Island, Alaska in 2017. U.S. Fish and Wildl. Serv. Rep., AMNWR 2017/17 Homer, Alaska.                                                                                                                                                                                                                                                                                                                                                                                                                                                                                                                                                                                                                                                                                                                                                                                                                                                                                             |
| 15 | <i>Aethia pygmaea</i>     | Pietrzak et al. (2017) | Pietrzak, K. W., M. L. Mudge, S. L. Walden, & N. A. Rojek. 2017. Biological monitoring at Buldir Island, Alaska in 2017. U.S. Fish and Wildl. Serv. Rep., AMNWR 2017/17 Homer, Alaska.                                                                                                                                                                                                                                                                                                                                                                                                                                                                                                                                                                                                                                                                                                                                                                                                                                                                                             |
| 16 | <i>Alca torda</i>         | Robert T. Barrett      | Barrett, R.T. 2001. The breeding demography and egg size of North Norwegian Atlantic Puffins <i>Fratercula arctica</i> and Razorbills <i>Alca torda</i> during 20 years of climatic variability. Atlantic Seabirds 3: 97–112.<br>Each year 40-50 marked nests were inspected once during the incubation period and 2-4 times during the chick-                                                                                                                                                                                                                                                                                                                                                                                                                                                                                                                                                                                                                                                                                                                                     |

|    |                           |                           |                                                                                                                                                                                                                                                                                                                                                                                                                                                                                                                                                                                                                                                                                                                                                                |
|----|---------------------------|---------------------------|----------------------------------------------------------------------------------------------------------------------------------------------------------------------------------------------------------------------------------------------------------------------------------------------------------------------------------------------------------------------------------------------------------------------------------------------------------------------------------------------------------------------------------------------------------------------------------------------------------------------------------------------------------------------------------------------------------------------------------------------------------------|
|    |                           |                           | rearing period at a c. 5-20 day intervals. Breeding success was estimated as the proportion of half-fully grown chicks found in burrows/no. burrows with egg.                                                                                                                                                                                                                                                                                                                                                                                                                                                                                                                                                                                                  |
| 17 | <i>Alectrurus risora</i>  | Adrián S. Di Giacomo      | Di Giacomo, A.S., A. G. Di Giacomo & J. C. Reboreda. 2011. Male and female reproductive success in a threatened polygynous species: the Strange-Tailed Tyrant ( <i>Alectrurus risora</i> ). The Condor 103: 619–628.<br>Di Giacomo, A.G., A. S. Di Giacomo, y J. C. Reboreda. 2011. Effects of grassland burning on reproductive success of globally threatened Strange-tailed Tyrants <i>Alectrurus risora</i> . Bird Conservation International 21: 411–422.                                                                                                                                                                                                                                                                                                 |
| 18 | <i>Anous tenuirostris</i> | Ramos & Monticelli (2007) | Ramos J.A. & David Monticelli. 2007. Long-term studies on productivity of Roseate Terns and Lesser Noddies on Aride Island, Seychelles. Ostrich 78: 443–447.<br>Ramos, J. A., A. M. Maul, J. Bowler, D. Monticelli e C. Pacheco. 2004. Laying date, chick provisioning, and breeding success of Lesser Noddies on Aride Island, Seychelles. Condor 106: 888–896.                                                                                                                                                                                                                                                                                                                                                                                               |
| 19 | <i>Apus apus</i>          | Heikki Kolunen            | Kolunen H. 1986. Tervapääskyn ( <i>Apus apus</i> ) pesyekoon määräytyminen. Msc Thesis, University of Helsinki.<br>The colony of common swifts nests on a house which was built in the early 1900s, and since then boxes have been occupied. Since 1979 adults and young have been ringed by Heikki Kolunen. Nests were visited 2-4 times during each breeding season (breeding is highly synchronised). The number of eggs and nestlings was confirmed for each nestbox. If offspring disappeared before the expected fledging time, the nests was classified as failed. If the young were present before, and during last visit (after the expected fledging time) the young disappeared without traces of predation, the nest was classified as successful. |
| 20 | <i>Branta leucopsis</i>   | Jouke Prop                | Prop, J., & De Vries, J. 1993. Impact of snow and food conditions on the reproductive performance of barnacle geese <i>Branta leucopsis</i> . Ornis Scandinavica 24: 110–121.<br>Lameris, T. K., de Jong, M. E., Boom, M. P., van der Jeugd, H. P., Litvin, K. E., Loonen, M. J. J. E., Nolet, B. A., & Prop, J. (2019). Climate warming may affect the optimal timing of reproduction for migratory geese differently in the low and high Arctic. Oecologia 191: 1003–1014.                                                                                                                                                                                                                                                                                   |
| 21 | <i>Bucephala clangula</i> | Hannu Pöysä               | Pöysä, H. 1999. Conspecific nest parasitism is associated with inequality in nest predation risk in the common goldeneye ( <i>Bucephala clangula</i> ). Behavioral Ecology 10: 533–540.<br>Pöysä, H. 2006. Public information and conspecific nest parasitism in goldeneyes: targeting safe nests by parasites. Behavioral Ecology 17: 459–465.                                                                                                                                                                                                                                                                                                                                                                                                                |
| 22 | <i>Bucorvus cafer</i>     | Kate F. Carstens          | Carstens et al. 2019. Breeding success and population growth of Southern Ground Hornbills <i>Bucorvus leadbeateri</i> in an area supplemented with nest boxes. Bird Conservation International 29(4): 627 – 643.                                                                                                                                                                                                                                                                                                                                                                                                                                                                                                                                               |
| 23 | <i>Bulweria bulwerii</i>  | Verónica C. Neves         | Bried, J., Andris, M., Dubois, M.-P. & Jarne, P. 2021. Decreased selectivity during mate choice in a small-sized population of a long-lived seabird. Journal of Avian Biology 52(12): e02837. doi: 10.1111/jav.02837<br>Cruz-Flores, M., Pradel, R., Bried, J., Militão, T., Neves, V.C., González-Solís, J. & Ramos, R. 2022. Will climate change affect the survival of tropical and subtropical species? Predictions based on Bulwer’s petrel populations in the NE Atlantic Ocean. Science of the Total Environment 847: 157352. DOI:10.1016/j.scitotenv.2022.157352.                                                                                                                                                                                      |



|    |                                             |                       |                                                                                                                                                                                                                                                                                                                                                                                                                                                                                                                                                                                                                                                                                                                                                                                                 |
|----|---------------------------------------------|-----------------------|-------------------------------------------------------------------------------------------------------------------------------------------------------------------------------------------------------------------------------------------------------------------------------------------------------------------------------------------------------------------------------------------------------------------------------------------------------------------------------------------------------------------------------------------------------------------------------------------------------------------------------------------------------------------------------------------------------------------------------------------------------------------------------------------------|
| 24 | <i>Calonectris borealis</i>                 | Joël Bried            | Fontaine, R., Gimenez, O. & Bried, J. 2011. The impact of introduced predators, light-induced mortality of fledglings and poaching on the dynamics of the Cory's Shearwater ( <i>Calonectris diomedea</i> ) population from the Azores, northeastern subtropical Atlantic. <i>Biological Conservation</i> 144: 1998–2011.                                                                                                                                                                                                                                                                                                                                                                                                                                                                       |
| 25 | <i>Calonectris diomedea</i>                 | Daniel Oro            | Genovart, M., Sanz-Aguilar, A., Fernández-Chacón, A., Igual, J.M.; Pradel, R., Forero, M.G. & Oro, D. 2013. Contrasting effects of climatic variability on the demography of a trans-equatorial migratory seabird. <i>Journal of Animal Ecology</i> 82: 121–130.<br>Sanz-Aguilar, A., Igual, J.M., Oro, D., Genovart, M. & Tavecchia, G. 2016. Estimating recruitment and survival in partially-monitored populations. <i>Journal of Applied Ecology</i> 53: 73–82                                                                                                                                                                                                                                                                                                                              |
| 26 | <i>Calyptorhynchus lathami halmaturinus</i> | Morgan et al. (2015)  | Morgan, D., Barth, M. & Kinloch, M. 2015. The South Australian subspecies of the glossy black-cockatoo ( <i>Calyptorhynchus lathami halmaturinus</i> ) Strategic Plan 2015–2020. A report by Natural Resources Kangaroo Island for the Kangaroo Island Natural Resources Management Board. Australian Government.                                                                                                                                                                                                                                                                                                                                                                                                                                                                               |
| 27 | <i>Calyptorhynchus latirostris</i>          | Denis A. Saunders     | Saunders, D. A. & Dawson, R. 2018. Cumulative learnings and conservation implications of a long-term study of the endangered Carnaby's Cockatoo <i>Calyptorhynchus latirostris</i> . <i>Australian Zoologist</i> 39: 591–609.                                                                                                                                                                                                                                                                                                                                                                                                                                                                                                                                                                   |
| 28 | <i>Cerorhinca monocerata</i>                | Watanuki & Ito (2012) | Watanuki, Y. & Ito, M. 2012. Climatic effects on breeding seabirds of the northern Japan Sea. <i>Marine Ecology Progress Series</i> 454: 183–196.<br>Osa, Y. & Watanuki, Y. 2002. Status of Seabirds Breeding in Hokkaido. <i>Journal of the Yamashina Institute for Ornithology</i> 33: 107–141.                                                                                                                                                                                                                                                                                                                                                                                                                                                                                               |
| 29 | <i>Cerorhinca monocerata</i>                | Evans et al (2018)    | Evans, S. A., D. J. Schultz, & B. A. Drummond. 2018. Biological monitoring at Saint Lazaria Island, Alaska in 2018. U.S. Fish and Wildl. Serv. Rep., AMNWR 2018/19. Homer, Alaska.                                                                                                                                                                                                                                                                                                                                                                                                                                                                                                                                                                                                              |
| 30 | <i>Chroicocephalus ridibundus</i>           | Dariusz Bukaciński    | Bukaciński D., Bukacińska M. 1995. The factors limiting breeding success in the Black-headed Gull ( <i>Larus ridibundus</i> ) in different habitat types on the middle course of the Vistula River, Poland. <i>Arch. fur Hydrobiol.</i> 101, Large Rivers 9: 221–228<br>Bukaciński D., Bukacińska M., Buczyński A. 2020. Offspring Sex Ratio in the First and Replacement Clutches of the Mew Gulls ( <i>Larus canus</i> ): Breeding Tactics in the Riverine Population of a Sexually Size-dimorphic Bird. <i>Waterbirds</i> 43: 174–185.<br>Bukaciński M. 1988. Zmiany liczebności i wybiórczość środowiskowa mewy śmieszki na wyspach wiślanych [Changes in the abundance and habitat selection of the black-headed gull on the Vistula islands]. Msc thesis, University of Warsaw, Warszawa. |
| 31 | <i>Ciconia ciconia</i>                      | Andrzej Wuczyński     | Guziak R. 2006. [Methods]. In: Guziak R., Jakubiec Z., editors. 2006. White stork <i>Ciconia ciconia</i> (L.) in Poland in 2004. Wrocław: Results of the VIth International White Stork Census. PTPP “proNatura” pp. 19–26 (in Polish with English summary).<br>Wuczyński, A., J. Betleja, L. Jerzak, W. Król, P. Mielczarek, P. Profus, A. Siekiera, J. Siekiera, S. Springer, H. Sztwiertnia, J. Szymczak, M. Tobółka, P. Tryjanowski & M. Wuczyński. 2021. Strong declines of the White Stork <i>Ciconia ciconia</i> population in south-western Poland: a differentiated importance of altitude and land use changes. <i>Acta Ornithologica</i> 56: 255–271.                                                                                                                                |

|    |                            |                      |                                                                                                                                                                                                                                                                                                                                                                                                                                                        |
|----|----------------------------|----------------------|--------------------------------------------------------------------------------------------------------------------------------------------------------------------------------------------------------------------------------------------------------------------------------------------------------------------------------------------------------------------------------------------------------------------------------------------------------|
| 32 | <i>Ciconia ciconia</i>     | Beata Orłowska       | Wuczyński, A., J. Betleja, L. Jerzak, W. Król, P. Mielczarek, P. Profus, A. Siekiera, J. Siekiera, S. Springer, H. Sztwiertnia, J. Szymczak, M. Tobółka, P. Tryjanowski & M. Wuczyński. 2021. Strong declines of the White Stork <i>Ciconia ciconia</i> population in south-western Poland: a differentiated importance of altitude and land use changes. <i>Acta Ornithologica</i> 56: 255–271.                                                       |
| 33 | <i>Ciconia ciconia</i>     | Marcin Tobolka       | Tobolka, M., Dylewski, L., Wozna, J. T., & Zolnierowicz, K. M. 2018. How weather conditions in non-breeding and breeding grounds affect the phenology and breeding abilities of white storks. <i>Science of the Total Environment</i> , 636, 512-518.<br>Tobolka, M., Zolnierowicz, K. M., & Reeve, N. F. 2015. The effect of extreme weather events on breeding parameters of the White Stork <i>Ciconia ciconia</i> . <i>Bird Study</i> 62: 377–385. |
| 34 | <i>Ciconia ciconia</i>     | Anna Chernomorets    | Chernomorets, A. 2019. Dynamics of number, success of reproduction and territorial distribution of White Stork in the central part of Belarus. <i>Proc. Natl. Acad. Sci Belarus, Biol. Series</i> 64: 472–477.                                                                                                                                                                                                                                         |
| 35 | <i>Ciconia ciconia</i>     | Irina E. Samusenko   | Samusenko, I.E. 2011. Factors influencing White Stork <i>Ciconia ciconia</i> breeding success at the Pripjat river floodplain. <i>Proceedings of the National Academy of Sciences of Belarus. Biological Series</i> 4: 99–102.                                                                                                                                                                                                                         |
| 36 | <i>Circus cyaneus</i>      | Alexandre Millon     | Millon, A., Bourrioux J.-L., Riols C. & Bretagnolle, V. 2002. Comparative breeding biology of Hen Harrier and Montagu's Harrier: an 8-year study in north-eastern France. <i>Ibis</i> 144: 94–105.                                                                                                                                                                                                                                                     |
| 37 | <i>Circus pygargus</i>     | Pascal Albert        | Millon, A., Bourrioux J.-L., Riols C. & Bretagnolle, V. 2002. Comparative breeding biology of Hen Harrier and Montagu's Harrier: an 8-year study in north-eastern France. <i>Ibis</i> 144: 94–105.                                                                                                                                                                                                                                                     |
| 38 | <i>Circus pygargus</i>     | Thierry Printemps    | Millon, A., Bourrioux J.-L., Riols C. & Bretagnolle, V. 2002. Comparative breeding biology of Hen Harrier and Montagu's Harrier: an 8-year study in north-eastern France. <i>Ibis</i> 144: 94–105.                                                                                                                                                                                                                                                     |
| 39 | <i>Circus pygargus</i>     | Jarosław Wiącek      | Wiącek, J. 2015. Long-term changes of breeding success in Montagu's Harrier <i>Circus pygargus</i> . <i>Belg. J. Zool.</i> , 145: 103–114                                                                                                                                                                                                                                                                                                              |
| 40 | <i>Clanga clanga</i>       | Valery C. Dombrovski | Dombrovski, V.C. 2005. Sukces lęgowy orlików grubodziobych <i>Aquila clanga</i> oraz ich mieszańców z orlikiem krzykliwym <i>Aquila pomarina</i> na Białorusi. W: Mizera T., & B.-U. Meyburg (ed.). <i>Badania i problemy ochrony orlika grubodziobego <i>Aquila clanga</i> i krzykliwego <i>Aquila pomarina</i></i> . Materiały międzynarodowej konferencji, Osowiec, 16-18 września 2005. Biebrzański Park Narodowy. Osowiec-Poznań-Berlin: 35-42.   |
| 41 | <i>Clanga pomarina</i>     | Zbyryt et al (2015)  | Zbyryt, A., Kapowicz E., Kapowicz R., Zub K. 2016. Numbers, density and breeding success of the Lesser Spotted Eagle <i>Clanga pomarina</i> in the Knyszyn Forest (NE Poland) in 1999–2015. <i>Ornis Polonica</i> 57: 237–247.                                                                                                                                                                                                                         |
| 42 | <i>Colaptes auratus</i>    | Karen L. Wiebe       | Wiebe, K.L. & Swift, T. 2001. Clutch size relative to tree cavity size in Northern Flickers. <i>Journal of Avian Biology</i> 32: 167–173.                                                                                                                                                                                                                                                                                                              |
| 43 | <i>Corvus corone</i>       | Vittorio Baglione    | Canestrari, D., Marcos, J. M., & Baglione, V. 2008. Reproductive success increases with group size in cooperative carrion crows, <i>Corvus corone corone</i> . <i>Animal Behaviour</i> 75: 403-416.                                                                                                                                                                                                                                                    |
| 44 | <i>Cyanistes caeruleus</i> | Jaime Potti          | Camacho, C., Canal, D. & Potti, J. 2015. Testing the matching habitat choice hypothesis: phenotype-environment correlation and fitness in a wild bird population. <i>Evolutionary Ecology</i> 29: 873–886.                                                                                                                                                                                                                                             |

|    |                            |                    |                                                                                                                                                                                                                                                                                                                                                                                                                                                                                        |
|----|----------------------------|--------------------|----------------------------------------------------------------------------------------------------------------------------------------------------------------------------------------------------------------------------------------------------------------------------------------------------------------------------------------------------------------------------------------------------------------------------------------------------------------------------------------|
|    |                            |                    | <p>Potti, J. 2009. Advanced breeding dates in relation to recent climate warming in a Mediterranean montane population of Blue Tits <i>Cyanistes caeruleus</i>. <i>Journal of Ornithology</i> 150: 893–901.</p> <p>Hatchlings and fledglings counted with regular visits each 1-3 days. Nestling mortality controlled from hatching to fledging by considering both the number of young surviving at day 13 and those found dead in the nest 18–20 days after hatching.</p>            |
| 45 | <i>Cyanistes caeruleus</i> | János Török        | <p>Török, J. &amp; Tóth, L. 1988: Density dependence in reproduction of the Collared Flycatcher (<i>Ficedula albicollis</i>) at high population levels. <i>Journal of Animal Ecology</i> 57: 251–258.</p> <p>Herényi, M., Hegyi, G., Garamszegi, L.Z., Hargitai, R., Michl, G., Rosivall, B. &amp; Török, J. 2012: Fitness correlates of attractiveness, breeding lifespan and mating status in male collared flycatchers. <i>Oecologia</i> 170: 935–942.</p>                          |
| 46 | <i>Cyanistes caeruleus</i> | Jerzy Bańbura      | <p>Gładalski M., Bańbura M., Kaliński A., Markowski M., Skwarska J., Wawrzyniak J., Zieliński P., Cyżewska I., Bańbura J. 2017. Differences in the breeding success of Blue Tits <i>Cyanistes caeruleus</i> between a forest and an urban area: a long-term study. <i>Acta Ornithol.</i> 52: 59–68.</p>                                                                                                                                                                                |
| 47 | <i>Cyanistes caeruleus</i> | Marcel E. Visser   | <p>Husby, A., Kruuk, L.E., &amp; Visser, M.E. 2009. Decline in the frequency and benefits of multiple brooding in great tits as a consequence of a changing environment. <i>Proc Biol Sci.</i> 276: 1845–54.</p> <p>Visser, M.E., van Noordwijk, A.J., Tinbergen, J.M. &amp; Lessels, C.M. 1998. Warmer springs lead to mis-timed reproduction in Great Tits (<i>Parus major</i>). <i>Proc. R. Soc. Lond. B.</i> 265: 1867–1870.</p>                                                   |
| 48 | <i>Cyanistes caeruleus</i> | Marcel E. Visser   | <p>Husby, A., Kruuk, L.E., &amp; Visser, M.E. 2009. Decline in the frequency and benefits of multiple brooding in great tits as a consequence of a changing environment. <i>Proc Biol Sci.</i> 276: 1845–54.</p> <p>Visser, M.E., van Noordwijk, A.J., Tinbergen, J.M. &amp; Lessels, C.M. 1998. Warmer springs lead to mis-timed reproduction in Great Tits (<i>Parus major</i>). <i>Proc. R. Soc. Lond. B.</i> 265: 1867–1870.</p>                                                   |
| 49 | <i>Cyanistes caeruleus</i> | Marcel E. Visser   | <p>Husby, A., Kruuk, L.E., &amp; Visser, M.E. 2009. Decline in the frequency and benefits of multiple brooding in great tits as a consequence of a changing environment. <i>Proc Biol Sci.</i> 276: 1845–54.</p> <p>Visser, M.E., van Noordwijk, A.J., Tinbergen, J.M. &amp; Lessels, C.M. 1998. Warmer springs lead to mis-timed reproduction in Great Tits (<i>Parus major</i>). <i>Proc. R. Soc. Lond. B.</i> 265: 1867–1870.</p>                                                   |
| 50 | <i>Cyanistes caeruleus</i> | Marcel E. Visser   | <p>Husby, A., Kruuk, L.E., &amp; Visser, M.E. 2009. Decline in the frequency and benefits of multiple brooding in great tits as a consequence of a changing environment. <i>Proc Biol Sci.</i> 276: 1845–54.</p> <p>Visser, M.E., van Noordwijk, A.J., Tinbergen, J.M. &amp; Lessels, C.M. 1998. Warmer springs lead to mis-timed reproduction in Great Tits (<i>Parus major</i>). <i>Proc. R. Soc. Lond. B.</i> 265: 1867–1870.</p>                                                   |
| 51 | <i>Cygnus bewickii</i>     | Diana V. Solovyeva | <p>Solovyeva, D., Koyama, K. &amp; Vartanyan, S. 2019. Living child-free: proposal for density-dependent regulation in Bewick's Swans <i>Cygnus columbianus bewickii</i>. <i>Wildfowl</i> (2019) Special Issue 5:197–210</p> <p>Solovyeva D.V., Vartanyan S.L., Frederiksen M., Fox A.D. 2018. Changes in nesting success and breeding abundance of Spectacled eiders <i>Somateria fischeri</i> in the Chaun delta, Chukotka, Russia, 2003–2016. <i>Polar Biology</i> 41: 743–751.</p> |
| 52 | <i>Delichon urbicum</i>    | Alfonso Marzal     | <p>Marzal, A., de Lope F., Navarro C. &amp; Møller, A.P. 2005. Malarial parasites decrease reproductive success: an</p>                                                                                                                                                                                                                                                                                                                                                                |

|    |                            |                       |                                                                                                                                                                                                                                                                                                                                                                                                                                                                                                                                                                                                                                                                                                                                                              |
|----|----------------------------|-----------------------|--------------------------------------------------------------------------------------------------------------------------------------------------------------------------------------------------------------------------------------------------------------------------------------------------------------------------------------------------------------------------------------------------------------------------------------------------------------------------------------------------------------------------------------------------------------------------------------------------------------------------------------------------------------------------------------------------------------------------------------------------------------|
|    |                            |                       | experimental study in a passerine bird. <i>Oecologia</i> 142: 541–545.                                                                                                                                                                                                                                                                                                                                                                                                                                                                                                                                                                                                                                                                                       |
| 53 | <i>Diomedea exulans</i>    | Richard A. Phillips   | Pardo, D., Forcada, J., Wood, A.G., Tuck, G.N., Ireland, L., Pradel, R., J.P. Croxall & Phillips, R.A. 2017. Additive effects of climate and fisheries drive catastrophic declines in multiple albatross species. <i>Proceedings of the National Academy of Science of the United States of America</i> 114, E10829-E10837.                                                                                                                                                                                                                                                                                                                                                                                                                                  |
| 54 | <i>Falco naumanni</i>      | Inês Catry            | Catry, I., Franco, A.M.A., Rocha, P., Alcazar, R., Reis, S., Cordeiro, A., Ventim, R., Teodósio, J. & Moreira F. 2013. Foraging habitat quality constrains effectiveness of artificial nest site provisioning in reversing population declines in a colonial cavity nester. <i>PLoS ONE</i> 8: e58320.<br>Catry, T., Moreira, F., Alcazar, R., Rocha, P. & Catry, I. 2017. Mechanisms and fitness consequences of laying decisions in a migratory raptor. <i>Behavioral Ecology</i> 28: 222–232.                                                                                                                                                                                                                                                             |
| 55 | <i>Falco tinnunculus</i>   | Juan Antonio Fargallo | Fargallo, J.A., Blanco, G., Potti, J. and Viñuela, J. 2001. Nest-box provisioning in a rural population of Eurasian Kestrels: breeding performance, nest predation and nest parasitism. <i>Bird Study</i> 48: 236-244.<br>Navarro-López, J. & Fargallo, J.A. 2015. Trophic niche in a raptor species: the relationship between diet diversity, habitat diversity and territory quality. <i>PLoS ONE</i> 10(6): e0128855.                                                                                                                                                                                                                                                                                                                                     |
| 56 | <i>Ficedula albicollis</i> | Milos Krist           | Krist, M. & Štriteský, J. 2008. Does cavity height affects its attractiveness and safety for secondary hole-nesting birds? <i>Zprávy Vlastivědného muzea v Olomouci</i> , 293-295, 74-80.                                                                                                                                                                                                                                                                                                                                                                                                                                                                                                                                                                    |
| 57 | <i>Ficedula albicollis</i> | Peter Adamík          | Weidinger, K., & Kral, M. 2007. Climatic effects on arrival and laying dates in a long-distance migrant, the Collared Flycatcher <i>Ficedula albicollis</i> . <i>Ibis</i> 149: 836–847.<br>Adamík, P., & Král, M. 2008. Nest losses of cavity nesting birds caused by dormice (Gliridae, Rodentia). <i>Acta theriologica</i> 53: 185–192.                                                                                                                                                                                                                                                                                                                                                                                                                    |
| 58 | <i>Ficedula albicollis</i> | János Török           | Laczi, M., Garamszegi, L. Z., Hegyi, G., Herényi, M., Ilyés, G., Könczey, R., Nagy, G., Pongrácz, R., Rosivall, B., Szöllösi, E., Tóth, L. and Török, J. 2019: Teleconnections and weather orchestrate reproduction of tit species in the Carpathian Basin. <i>Journal of Avian Biology</i> , 50:e02179.<br>Török, J. and Tóth, L. 1988: Density dependence in reproduction of the Collared Flycatcher ( <i>Ficedula albicollis</i> ) at high population levels. <i>Journal of Animal Ecology</i> 57: 251–258.<br>Herényi, M., Hegyi, G., Garamszegi, L.Z., Hargitai, R., Michl, G., Rosivall, B. and Török, J. 2012: Fitness correlates of attractiveness, breeding lifespan and mating status in male collared flycatchers. <i>Oecologia</i> 170: 935–942. |
| 59 | <i>Ficedula hypoleuca</i>  | Jaime Potti           | Camacho C, Canal D, Potti J. 2015. Testing the matching habitat choice hypothesis: phenotype-environment correlation and fitness in a wild bird population. <i>Evolutionary Ecology</i> 29:873–886.<br>Camacho, C., Canal, D. & Potti, J. 2016. Natal habitat imprinting counteracts the diversifying effects of phenotype-dependent dispersal in a spatially structured population. <i>BMC Evolutionary Biology</i> 16: 158.<br>Hatchlings and fledglings counted with regular visits each 1-3 days. Nestling mortality controlled from hatching to fledging by considering both the number of young surviving at day 13 and those found dead in the nest 18–20 days after hatching.                                                                        |
| 60 | <i>Ficedula hypoleuca</i>  | Tapio Eeva            | Eeva T, Lehikoinen E. 2015. Long-term recovery of clutch size and egg shell quality of the pied flycatcher ( <i>Ficedula</i>                                                                                                                                                                                                                                                                                                                                                                                                                                                                                                                                                                                                                                 |

|    |                            |                        |                                                                                                                                                                                                                                                                                                                                                                                                                                                                                                                                                                                                                                                                                  |
|----|----------------------------|------------------------|----------------------------------------------------------------------------------------------------------------------------------------------------------------------------------------------------------------------------------------------------------------------------------------------------------------------------------------------------------------------------------------------------------------------------------------------------------------------------------------------------------------------------------------------------------------------------------------------------------------------------------------------------------------------------------|
|    |                            |                        | hypoleuca) in a metal polluted area. <i>Environmental Pollution</i> 201: 26–33.                                                                                                                                                                                                                                                                                                                                                                                                                                                                                                                                                                                                  |
| 61 | <i>Ficedula hypoleuca</i>  | Alexander V. Artemyev  | Artemyev, A.V. 2008. Factors responsible for long-term population dynamics of the Pied Flycatcher <i>Ficedula hypoleuca</i> in taiga forests (Karelia, Russia). <i>Acta Ornithologica</i> . 43: 10–16.<br>Artemyev, A.V. 2018. Causes of variation in the frequency of polygyny in the European Pied Flycatcher <i>Ficedula hypoleuca</i> population of Karelia. <i>Russian Journal of Ecology</i> 49: 537–545.                                                                                                                                                                                                                                                                  |
| 62 | <i>Ficedula hypoleuca</i>  | Marcel E. Visser       | Both, C., Bijlsma, R.G. & Visser, M.E. 2005. Climatic effects on timing of spring migration and breeding in a long-distance migrant, the pied flycatcher <i>Ficedula hypoleuca</i> . <i>J. Avian Biol.</i> 36: 368–373.                                                                                                                                                                                                                                                                                                                                                                                                                                                          |
| 63 | <i>Ficedula hypoleuca</i>  | Eugen Belskii          | Belskii, E. & Lyakhov, A. 2022. Improved breeding parameters in the pied flycatcher with reduced pollutant emissions from a copper smelter. <i>Environmental Pollution</i> , 302, 119089.                                                                                                                                                                                                                                                                                                                                                                                                                                                                                        |
| 64 | <i>Ficedula hypoleuca</i>  | Boris D. Kuranov       | Kuranov, B.D., Nekhoroshev, O.G., Gureev, S.P. & Kilin, S.V. 2019. Nesting of the pied Flycatcher ( <i>Ficedula hypoleuca</i> Pall.) in the southeast of Western Siberia. <i>Contemporary Problems of Ecology</i> 12: 607–620.                                                                                                                                                                                                                                                                                                                                                                                                                                                   |
| 65 | <i>Ficedula hypoleuca</i>  | Mirosława Bańbura      | Skwarska J., Kaliński A., Wawrzyniak J., Markowski M., Mikus W., Bańbura M., Gładalski M., Zieliński P., Bańbura J. 2012. Long-term variation in laying date and clutch size of Pied Flycatchers <i>Ficedula hypoleuca</i> in central Poland. <i>Polish Journal of Ecology</i> 60: 187–192.                                                                                                                                                                                                                                                                                                                                                                                      |
| 66 | <i>Ficedula hypoleuca</i>  | Indrikis Krams         | Samplonius, J.M., Bartošová, L., Burgess, M., Bushuev, A., Eeva, T., Ivankina, E., Kerimov, A., Krams, I., Laaksonen, T., Mägi, M., Mänd, R., Potti, J., Török, J., Trnka, M., Visser, M., Zang, H., Both, C. 2018. Phenological sensitivity to climate change is higher in resident than in migrant bird populations among European cavity breeders. <i>Global Change Biology</i> 24: 3780–3790.<br>Krams, I.A., Mennerat, A., Krama, T., Krams, R., Jöers, P., Elferts, D., Luoto, S., Rantala, M.J., Eliassen, S. 2022. Extra-pair paternity determines cooperation in a bird species. <i>Proceedings of the National Academy of Sciences of America</i> 119(5): e2112004119. |
| 67 | <i>Fratercula arctica</i>  | Robert T. Barrett      | Barrett, R.T. 2001. The breeding demography and egg size of North Norwegian Atlantic Puffins <i>Fratercula arctica</i> and Razorbills <i>Alca torda</i> during 20 years of climatic variability. <i>Atlantic Seabirds</i> 3: 97–112.<br>Each year 40-50 marked nests were inspected once during the incubation period and 2-4 times during the chick-rearing period at a c. 5-20 day intervals. Breeding success was estimated as the proportion of half-fully grown chicks found in burrows/no. burrows with egg.                                                                                                                                                               |
| 68 | <i>Fratercula cirrhata</i> | Youngren et al. (2018) | Youngren, S. M., D. C. Rapp, & N. A. Rojek. 2018. Biological monitoring at Aiktak Island, Alaska in 2017. U.S. Fish and Wildl. Serv. Rep., AMNWR 2018/03. Homer, Alaska                                                                                                                                                                                                                                                                                                                                                                                                                                                                                                          |
| 69 | <i>Fratercula cirrhata</i> | Pietrzak et al. (2017) | Pietrzak, K. W., M. L. Mudge, S. L. Walden, & N. A. Rojek. 2017. Biological monitoring at Buldir Island, Alaska in 2017. U.S. Fish and Wildl. Serv. Rep., AMNWR 2017/17 Homer, Alaska.                                                                                                                                                                                                                                                                                                                                                                                                                                                                                           |
| 70 | <i>Fratercula cirrhata</i> | Evans et al (2017)     | Evans, S. A., D. J. Schultz, & N. A. Rojek. 2017. Biological monitoring at Chowiet Island, Alaska in 2017. U.S. Fish and Wildl. Serv. Rep., AMNWR 2017/18. Homer, Alaska.                                                                                                                                                                                                                                                                                                                                                                                                                                                                                                        |
| 71 | <i>Fratercula cirrhata</i> | Elena Yu. Golubova     | Golubova, E.Yu. 2017. Breeding Biology of the Parakeet Auklet ( <i>Cyclorhynchus psittacula</i> ) on Talan Island                                                                                                                                                                                                                                                                                                                                                                                                                                                                                                                                                                |

|    |                               |                        |                                                                                                                                                                                                                                                                                                                                                                                                                                                                                                                |
|----|-------------------------------|------------------------|----------------------------------------------------------------------------------------------------------------------------------------------------------------------------------------------------------------------------------------------------------------------------------------------------------------------------------------------------------------------------------------------------------------------------------------------------------------------------------------------------------------|
|    |                               |                        | (Northern Sea of Okhotsk). <i>Biology Bulletin</i> 44,: 735–750.<br>Kitaysky, A.S. & Golubova E.Yu. 2000. Climate change causes contrasting trends in reproductive performance of planktivorous and piscivorous alcids. <i>Journal of Animal Ecology</i> 69: 248–262.                                                                                                                                                                                                                                          |
| 72 | <i>Fratercula corniculata</i> | Youngren et al. (2018) | Youngren, S. M., D. C. Rapp, & N. A. Rojek. 2018. Biological monitoring at Aiktak Island, Alaska in 2017. U.S. Fish and Wildl. Serv. Rep., AMNWR 2018/03. Homer, Alaska                                                                                                                                                                                                                                                                                                                                        |
| 73 | <i>Fratercula corniculata</i> | Pietrzak et al. (2017) | Pietrzak, K. W., M. L. Mudge, S. L. Walden, & N. A. Rojek. 2017. Biological monitoring at Buldir Island, Alaska in 2017. U.S. Fish and Wildl. Serv. Rep., AMNWR 2017/17 Homer, Alaska.                                                                                                                                                                                                                                                                                                                         |
| 74 | <i>Fratercula corniculata</i> | Evans et al (2017)     | Evans, S. A., D. J. Schultz, & N. A. Rojek. 2017. Biological monitoring at Chowiet Island, Alaska in 2017. U.S. Fish and Wildl. Serv. Rep., AMNWR 2017/18. Homer, Alaska.                                                                                                                                                                                                                                                                                                                                      |
| 75 | <i>Fratercula corniculata</i> | Elena Yu. Golubova     | Golubova, E.Yu. 2017. Breeding Biology of the Parakeet Auklet ( <i>Cyclorhynchus psittacula</i> ) on Talan Island (Northern Sea of Okhotsk). <i>Biology Bulletin</i> 44: 735–750.<br>Kitaysky, A.S. & Golubova E.Yu. 2000. Climate change causes contrasting trends in reproductive performance of planktivorous and piscivorous alcids. <i>Journal of Animal Ecology</i> 69: 248–262.                                                                                                                         |
| 76 | <i>Fulmarus glacialis</i>     | Paul M. Thompson       | Thompson, P.M. & Ollason, J.C. 2001. Lagged effects of ocean climate change on fulmar population dynamics. <i>Nature</i> 413: 417–420<br>Lewis, S., Elston, D.A., Daunt, F., Cheney, B. & Thompson, P.M. (2009) Effects of extrinsic and intrinsic factors on breeding success in a long lived seabird. <i>Oikos</i> 118: 521–528.                                                                                                                                                                             |
| 77 | <i>Gypaetus barbatus</i>      | Antoni Margalida       | Margalida, A., D. Garcia, J. Bertran & R. Heredia. 2003. Breeding biology and success of the Bearded Vulture ( <i>Gypaetus barbatus</i> ) in the eastern Pyrenees. <i>Ibis</i> 145: 244–252.<br>Margalida, A., Colomer, M.A. & Oro, D. 2014. Man-induced activities modify demographic parameters in a long-lived species: effects of poisoning and health policies. <i>Ecological Applications</i> 24: 436–444.                                                                                               |
| 78 | <i>Gypaetus barbatus</i>      | Sonja Krüger           | Krüger, S.C, & Amar, A. 2017. Productivity of the declining Bearded Vulture <i>Gypaetus barbatus</i> population in southern Africa. <i>Ostrich</i> 88:2, 139–145.                                                                                                                                                                                                                                                                                                                                              |
| 79 | <i>Haematopus bachmani</i>    | Youngren et al. (2018) | Youngren, S. M., D. C. Rapp, & N. A. Rojek. 2018. Biological monitoring at Aiktak Island, Alaska in 2017. U.S. Fish and Wildl. Serv. Rep., AMNWR 2018/03. Homer, Alaska                                                                                                                                                                                                                                                                                                                                        |
| 80 | <i>Haematopus ostralegus</i>  | Martijn van de Pol     | Ens, B. J., M. Kersten, A. Brenninkmeijer & J. B. Hulscher. 1992. Territory quality, parental effort and reproductive success of oystercatchers ( <i>Haematopus ostralegus</i> ). <i>Journal of Animal Ecology</i> 61: 703–715.<br>Allen, Andrew M., Jongejans, Eelke, van de Pol, Martijn, Ens, Bruno J., Frauendorf, Magali, van der Sluijs, Martijn, and de Kroon, Hans. 2022. “The Demographic Causes of Population Change Vary across Four Decades in a Long-Lived Shorebird.” <i>Ecology</i> 103: e3615. |
| 81 | <i>Hirundo rustica</i>        | Anders P. Møller       | Møller, A.P. 2007. Interval between clutches, fitness and climate change. <i>Behavioural Ecology</i> 18: 62–70.                                                                                                                                                                                                                                                                                                                                                                                                |
| 82 | <i>Hirundo rustica</i>        | Florentino de Lope     | Balbontin et al. 2007. Age-related change in breeding performance in early life is associated with an increase in competence in the migratory barn swallow <i>Hirundo rustica</i> . <i>Journal of Animal Ecology</i> 76: 915–925.                                                                                                                                                                                                                                                                              |

|    |                              |                        |                                                                                                                                                                                                                                                                                                                                                                                                                                                                                                                                                                                                                     |
|----|------------------------------|------------------------|---------------------------------------------------------------------------------------------------------------------------------------------------------------------------------------------------------------------------------------------------------------------------------------------------------------------------------------------------------------------------------------------------------------------------------------------------------------------------------------------------------------------------------------------------------------------------------------------------------------------|
| 83 | <i>Jynx torquilla</i>        | Michael Schaub         | Tenan, S, Becker, D, Tolkmitt, D, Schaub, M. 2021. Decomposing fecundity and evaluating demographic influence of multiple broods in a migratory bird. <i>J Anim Ecol.</i> 90: 1071–1084.<br>Schaub, M., Reichlin, T.S., Abadi, F. <i>et al.</i> 2012. The demographic drivers of local population dynamics in two rare migratory birds. <i>Oecologia</i> 168: 97–108.                                                                                                                                                                                                                                               |
| 84 | <i>Lamprotornis superbus</i> | Dustin R. Rubenstein   | Shah S.S. & D.R. Rubenstein. 2022. Prenatal environmental conditions underlie alternative reproductive tactics that drive the formation of a mixed-kin cooperative society. <i>Science Advances</i> 8: eabk2220.<br>Rubenstein D.R. 2011. Spatiotemporal environmental variation, risk aversion and the evolution of cooperative breeding as a bet-hedging strategy. <i>Proceedings of the National Academy of Sciences USA</i> 108:10816-10822.                                                                                                                                                                    |
| 85 | <i>Larus canus</i>           | Monika Bukacińska      | Bukaciński. D., Bukacińska. M. 2000. The impact of mass outbreaks of black flies (Simuliidae) on the parental behaviour and breeding output of colonial common gulls ( <i>Larus canus</i> ). <i>Ann. Zool. Fennici</i> 37: 43–49.<br>Bukaciński. D., Bukacińska. M., Lubjuhn. T. 2000. Adoption of chicks and the level of relatedness in Common Gull, <i>Larus canus</i> colonies: DNA fingerprinting analyses. <i>Anim. Behav.</i> 59: 289–299.<br>Bukaciński. D., Bukacińska. M. 2003. <i>Larus canus</i> Common Gull, <i>Birds of Western Palearctic Update 5</i> (ed. David Parkin), Oxford Univ. Press, 36 s. |
| 86 | <i>Larus crassirostris</i>   | Watanuki & Ito (2012)  | Watanuki, Y. & Ito, M. 2012. Climatic effects on breeding seabirds of the northern Japan Sea. <i>Marine Ecology Progress Series</i> 454: 183–196.<br>Osa, Y. & Watanuki, Y. 2002. Status of Seabirds Breeding in Hokkaido. <i>Journal of the Yamashina Institute for Ornithology</i> 33: 107–141.                                                                                                                                                                                                                                                                                                                   |
| 87 | <i>Larus glaucescens</i>     | Youngren et al. (2018) | Youngren, S. M., D. C. Rapp, & N. A. Rojek. 2018. Biological monitoring at Aiktak Island, Alaska in 2017. U.S. Fish and Wildl. Serv. Rep., AMNWR 2018/03. Homer, Alaska                                                                                                                                                                                                                                                                                                                                                                                                                                             |
| 88 | <i>Larus glaucescens</i>     | Pietrzak et al. (2017) | Pietrzak, K. W., M. L. Mudge, S. L. Walden, & N. A. Rojek. 2017. Biological monitoring at Buldir Island, Alaska in 2017. U.S. Fish and Wildl. Serv. Rep., AMNWR 2017/17 Homer, Alaska.                                                                                                                                                                                                                                                                                                                                                                                                                              |
| 89 | <i>Larus glaucescens</i>     | Evans et al (2017)     | Evans, S. A., D. J. Schultz, & N. A. Rojek. 2017. Biological monitoring at Chowiet Island, Alaska in 2017. U.S. Fish and Wildl. Serv. Rep., AMNWR 2017/18. Homer, Alaska.                                                                                                                                                                                                                                                                                                                                                                                                                                           |
| 90 | <i>Larus glaucescens</i>     | Evans et al (2018)     | Evans, S. A., D. J. Schultz, and B. A. Drummond. 2018. Biological monitoring at Saint Lazaria Island, Alaska in 2018. U.S. Fish and Wildl. Serv. Rep., AMNWR 2018/19. Homer, Alaska.                                                                                                                                                                                                                                                                                                                                                                                                                                |
| 91 | <i>Macronectes giganteus</i> | Andrew G. Wood         | Brown, R.M., Techow, NMSM, Wood, A.G. & Phillips, R.A. 2015. Hybridization and back-crossing in giant petrels ( <i>Macronectes giganteus</i> and <i>M. halli</i> ) at Bird Island South Georgia, and a summary of hybridization in seabirds. <i>PLoS ONE</i> 10: e0121688.<br>Hunter, S. 1984. Breeding biology and population dynamics of giant petrels <i>Macronectes</i> at South Georgia (Aves: Procellariiformes). <i>Journal of Zoology</i> 203: 441–460.                                                                                                                                                     |
| 92 | <i>Macronectes halli</i>     | Andrew G. Wood         | Brown, R.M., Techow, NMSM, Wood, A.G. & Phillips, R.A. 2015. Hybridization and back-crossing in giant petrels ( <i>Macronectes giganteus</i> and <i>M. halli</i> ) at Bird Island South Georgia, and a summary of hybridization in                                                                                                                                                                                                                                                                                                                                                                                  |

|     |                                |                            |                                                                                                                                                                                                                                                                                                                                                                                                                                       |
|-----|--------------------------------|----------------------------|---------------------------------------------------------------------------------------------------------------------------------------------------------------------------------------------------------------------------------------------------------------------------------------------------------------------------------------------------------------------------------------------------------------------------------------|
|     |                                |                            | seabirds. PLoS ONE 10: e0121688.<br>Hunter, S. 1984. Breeding biology and population dynamics of giant petrels <i>Macronectes</i> at South Georgia (Aves: Procellariiformes). <i>Journal of Zoology</i> 203: 441–460.                                                                                                                                                                                                                 |
| 93  | <i>Malurus elegans</i>         | Lyanne Brouwer             | Brouwer, L, Van De Pol, M, Atema, E. & Cockburn, A. 2011. Strategic promiscuity helps avoid inbreeding at multiple levels in a cooperative breeder where both sexes are philopatric. <i>Mol Ecol.</i> 20: 4796–807.<br>Russell, E., & Rowley, I. 2000. Demography and social organisation of the red-winged fairy-wren, <i>Malurus elegans</i> . <i>Aust. J. Zool.</i> 48: 161–200.                                                   |
| 94  | <i>Margarops fuscatus</i>      | Wayne J. Arendt            | Arendt, W,J. 2006. Adaptations of an avian supertramp: distribution, ecology, and life history of the pearly-eyed thrasher ( <i>Margarops fuscatus</i> ). General Technical Report ITF-GTR-27. San Juan, PR: U.S. Department of Agriculture, Forest Service, International Institute of Tropical Forestry. 416 pp.                                                                                                                    |
| 95  | <i>Melanerpes formicivorus</i> | Walter D. Koenig           | Koenig, W. D. & E. L. Walters. 2018. Causes of seasonal decline in reproduction of the cooperatively-breeding acorn woodpecker. <i>Journal of Avian Biology</i> 49: e01784.                                                                                                                                                                                                                                                           |
| 96  | <i>Mergus squamatus</i>        | Diana V. Solovyeva         | Solovyeva, D.V. & Vartanyan, S. 2019. Nesting Biology of the Scaly-Sided Merganser ( <i>Mergus squamatus</i> , Mergini, Anatidae) in Primorye, Russia. <i>Biology Bulletin</i> 46): 1075–1083.                                                                                                                                                                                                                                        |
| 97  | <i>Milvus migrans</i>          | Fabrizio Sergio            | Sergio, F., Blas, J., Blanco, G., Tanferna, A. López, L., Lemus, J. & Hiraldo, F. 2011. Raptor nest decorations are a reliable threat against conspecifics. <i>Science</i> 331: 327–330.<br>Sergio, F., Blas, J., López, L., Tanferna, A., Díaz-Delgado, R., Donázar, J.A. & Hiraldo, F. 2011. Coping with uncertainty: breeding adjustments to an unpredictable environment in an opportunistic raptor. <i>Oecologia</i> 166: 79–90. |
| 98  | <i>Oceanodroma furcata</i>     | Youngren et al. (2018)     | Youngren, S. M., D. C. Rapp, & N. A. Rojek. 2018. Biological monitoring at Aiktak Island, Alaska in 2017. U.S. Fish and Wildl. Serv. Rep., AMNWR 2018/03. Homer, Alaska                                                                                                                                                                                                                                                               |
| 99  | <i>Oceanodroma furcata</i>     | Pietrzak et al. (2017)     | Pietrzak, K. W., M. L. Mudge, S. L. Walden, & N. A. Rojek. 2017. Biological monitoring at Buldir Island, Alaska in 2017. U.S. Fish and Wildl. Serv. Rep., AMNWR 2017/17 Homer, Alaska.                                                                                                                                                                                                                                                |
| 100 | <i>Oceanodroma furcata</i>     | Kettle (2017)              | Kettle, A.B. 2017. Biological monitoring at East Amatuli Island, Alaska in 2016. U.S. Fish and Wildlife Service Report, AMNWR 2017/08. Homer, Alaska                                                                                                                                                                                                                                                                                  |
| 101 | <i>Oceanodroma furcata</i>     | Evans et al (2018)         | Evans, S. A., D. J. Schultz, & B. A. Drummond. 2018. Biological monitoring at Saint Lazaria Island, Alaska in 2018. U.S. Fish and Wildl. Serv. Rep., AMNWR 2018/19. Homer, Alaska.                                                                                                                                                                                                                                                    |
| 102 | <i>Oceanodroma furcata</i>     | Drummond & Williams (2015) | Drummond, B. A. & J. C. Williams. 2015. Biological monitoring in the central Aleutian Islands, Alaska in 2009-2015. U.S. Fish and Wildl. Serv. Rep., AMNWR 2015/16. Homer, Alaska                                                                                                                                                                                                                                                     |
| 103 | <i>Oceanodroma leucorhoa</i>   | Youngren et al. (2018)     | Youngren, S. M., D. C. Rapp, & N. A. Rojek. 2018. Biological monitoring at Aiktak Island, Alaska in 2017. U.S. Fish and Wildl. Serv. Rep., AMNWR 2018/03. Homer, Alaska                                                                                                                                                                                                                                                               |
| 104 | <i>Oceanodroma leucorhoa</i>   | Pietrzak et al. (2017)     | Pietrzak, K. W., M. L. Mudge, S. L. Walden, & N. A. Rojek. 2017. Biological monitoring at Buldir Island, Alaska in 2017. U.S. Fish and Wildl. Serv. Rep., AMNWR 2017/17 Homer, Alaska.                                                                                                                                                                                                                                                |



|            |                       |                    |                                                                                                                                                                                                                                                                                                                                                                                                                          |
|------------|-----------------------|--------------------|--------------------------------------------------------------------------------------------------------------------------------------------------------------------------------------------------------------------------------------------------------------------------------------------------------------------------------------------------------------------------------------------------------------------------|
| <b>105</b> | Oceanodroma leucorhoa | Evans et al (2018) | Evans, S. A., D. J. Schultz, & B. A. Drummond. 2018. Biological monitoring at Saint Lazaria Island, Alaska in 2018. U.S. Fish and Wildl. Serv. Rep., AMNWR 2018/19. Homer, Alaska.                                                                                                                                                                                                                                       |
| <b>106</b> | Oceanodroma monteiroi | Mark Bolton        | Robert, A., V.H. Paiva, M. Bolton, F. Jiguet & J. Bried. 2012. The interaction between reproductive cost and individual quality is mediated by oceanic conditions in a long-lived bird. Ecology 93: 1944–1952.<br>Robert, A., M. Bolton, F. Jiguet & J. Bried. 2015. The survival-reproduction association becomes stronger when conditions are good. Proceedings of the Royal Society of London B 282: 20151529.        |
| <b>107</b> | Oenanthe oenanthe     | Debora Arlt        | Arlt, D. & Pärt, T. 2017. Marked reduction in demographic rates and reduced fitness advantage for early breeding is not linked to reduced thermal matching of breeding time. Ecology & Evolution 7: 10782– 10796.<br>Öberg, M., Pärt, T., Arlt, D., Laugen, A. & Low, M. 2015 Rainfall during parental care reduces reproductive and survival components of fitness in a passerine bird. Ecology & Evolution 5: 345–356. |
| <b>108</b> | Pachyptila belcheri   | Petra Quillfeldt   | Quillfeldt, P., Strange, I.J. & Masello, J.F. 2007. Sea surface temperatures and behavioral buffering capacity in Thin-billed prions: breeding success, provisioning and chick begging. Journal of Avian Biology 38: 298–308.                                                                                                                                                                                            |
| <b>109</b> | Panurus biarmicus     | Janusz Stepniewski | Surmacki A., Stepniewski J. 2007. Do weather conditions affect the dynamics of bearded tit <i>Panurus biarmicus</i> populations throughout the year? A case study from western Poland. Ann. Zool. Fennici 44: 35–42.<br>Stepniewski J., Halupka L. 2018. Overlapping breeding attempts in the Bearded Tit <i>Panurus biarmicus</i> . Avian Research 9: 22.                                                               |
| <b>110</b> | Parus major           | Marcel E. Visser   | Husby A, Kruuk LE, Visser ME. 2009. Decline in the frequency and benefits of multiple brooding in great tits as a consequence of a changing environment. Proc Biol Sci. 276:1845–54.<br>Visser M.E., van Noordwijk A.J., Tinbergen J.M. & Lessels C.M. 1998. Warmer springs lead to mis-timed reproduction in Great Tits ( <i>Parus major</i> ). Proc. R. Soc. Lond. B. 265: 1867–1870.                                  |
| <b>111</b> | Parus major           | Marcel E. Visser   | Husby A, Kruuk LE, Visser ME. 2009. Decline in the frequency and benefits of multiple brooding in great tits as a consequence of a changing environment. Proc Biol Sci. 276:1845–54.<br>Visser M.E., van Noordwijk A.J., Tinbergen J.M. & Lessels C.M. 1998. Warmer springs lead to mis-timed reproduction in Great Tits ( <i>Parus major</i> ). Proc. R. Soc. Lond. B. 265: 1867–1870.                                  |
| <b>112</b> | Parus major           | Marcel E. Visser   | Husby A, Kruuk LE, Visser ME. 2009. Decline in the frequency and benefits of multiple brooding in great tits as a consequence of a changing environment. Proc Biol Sci. 276: 1845–54.<br>Visser M.E., van Noordwijk A.J., Tinbergen J.M. & Lessels C.M. 1998. Warmer springs lead to mis-timed reproduction in Great Tits ( <i>Parus major</i> ). Proc. R. Soc. Lond. B. 265: 1867–1870.                                 |
| <b>113</b> | Parus major           | Marcel E. Visser   | Husby A, Kruuk LE, Visser ME. 2009. Decline in the frequency and benefits of multiple brooding in great tits as a consequence of a changing environment. Proc Biol Sci. 276:1845–54.<br>Visser M.E., van Noordwijk A.J., Tinbergen J.M. & Lessels C.M. 1998. Warmer springs lead to mis-timed reproduction in Great Tits ( <i>Parus major</i> ). Proc. R. Soc. Lond. B. 265: 1867–1870.                                  |
| <b>114</b> | Parus major           | Juan C. Senar      | Navalpotro, et al. 2016. Comparing prey composition and prey size delivered to nestlings by great tit, <i>Parus major</i> , and                                                                                                                                                                                                                                                                                          |

|            |                                  |                          |                                                                                                                                                                                                                                                                                                                                                                                                                                                                                                                                                                                                                                                                                                                                                            |
|------------|----------------------------------|--------------------------|------------------------------------------------------------------------------------------------------------------------------------------------------------------------------------------------------------------------------------------------------------------------------------------------------------------------------------------------------------------------------------------------------------------------------------------------------------------------------------------------------------------------------------------------------------------------------------------------------------------------------------------------------------------------------------------------------------------------------------------------------------|
|            |                                  |                          | blue tit, <i>Cyanistes caeruleus</i> , in a Mediterranean sclerophyllous mixed forest. <i>Animal Biodiversity and Conservation</i> 39: 129–139.                                                                                                                                                                                                                                                                                                                                                                                                                                                                                                                                                                                                            |
| <b>115</b> | <i>Parus major</i>               | Emilio Barba             | Greño, J. L., Belda, E. & Barba, E. 2008. Temperatures during the nestling period affect postfledging survival in Mediterranean great tits <i>Parus major</i> . <i>Journal of Avian Biology</i> 39: 41–49.<br>Rodríguez, S., Álvarez, E. & Barba, E. 2016. Factors affecting fledgling output of great tits, <i>Parus major</i> , in the long term. <i>Animal Biodiversity and Conservation</i> 39: 147–154.                                                                                                                                                                                                                                                                                                                                               |
| <b>116</b> | <i>Parus major</i>               | János Török              | Laczi, M., Garamszegi, L. Z., Hegyi, G., Herényi, M., Ilyés, G., Könczey, R., Nagy, G., Pongrácz, R., Rosivall, B., Szöllösi, E., Tóth, L. and Török, J. 2019. Teleconnections and weather orchestrate reproduction of tit species in the Carpathian Basin. <i>Journal of Avian Biology</i> 50:e02179.<br>Török, J. and Tóth, L. 1988: Density dependence in reproduction of the Collared Flycatcher ( <i>Ficedula albicollis</i> ) at high population levels. <i>Journal of Animal Ecology</i> 57: 251–258.<br>Herényi, M., Hegyi, G., Garamszegi, L.Z., Hargitai, R., Michl, G., Rosivall, B. and Török, J. 2012: Fitness correlates of attractiveness, breeding lifespan and mating status in male collared flycatchers. <i>Oecologia</i> 170: 935–942. |
| <b>117</b> | <i>Parus major</i>               | Indrikis Krams           | Samplonius, J.M., Bartošová, L., Burgess, M., Bushuev, A., Eeva, T., Ivankina, E., Kerimov, A., Krams, I., Laaksonen, T., Mägi, M., Mänd, R., Potti, J., Török, J., Trnka, M., Visser, M., Zang, H., Both, C. 2018. Phenological sensitivity to climate change is higher in resident than in migrant bird populations among European cavity breeders. <i>Global Change Biology</i> 24: 3780–3790.<br>Krams, I.A., Mennerat, A., Krama, T., Krams, R., Jöers, P., Elferts, D., Luoto, S., Rantala, M.J., Eliassen, S. 2022. Extra-pair paternity determines cooperation in a bird species. <i>Proceedings of the National Academy of Sciences of America</i> 119: e2112004119.                                                                              |
| <b>118</b> | <i>Passer domesticus</i>         | David F. Westneat        | Hatch, M. I., & Westneat, D. F. 2007. Age-related patterns of reproductive success in house sparrows <i>Passer domesticus</i> . <i>Journal of Avian Biology</i> 38: 603–611.<br>Westneat, D. F., I. R. K. Stewart, E. H. Woeste, J. Gipson, L. Abdulkadir, and J. P. Poston. 2002. Patterns of sex ratio variation in house sparrows. <i>Condor</i> 104: 598–609.<br>Westneat, D. F., Stewart IRK, and Hatch, MI. 2009. Complex interactions among temporal variables affect the plasticity of clutch size in a multi-brooded bird. <i>Ecology</i> 90: 1162–1174.                                                                                                                                                                                          |
| <b>119</b> | <i>Passerculus sandwichensis</i> | Nathaniel T. Wheelwright | Wheelwright, N.T., and C. Teplitsky. 2017. Divorce in Savannah sparrows: causes, consequences and lack of inheritance. <i>The American Naturalist</i> 190: 557–569.<br>Wheelwright, N.T., C.R. Freeman-Gallant, and R.A. Mauck. 2006. Asymmetrical incest avoidance in the choice of social and genetic mates. <i>Animal Behaviour</i> 71: 631–639.                                                                                                                                                                                                                                                                                                                                                                                                        |
| <b>120</b> | <i>Perisoreus infaustus</i>      | Michael Griesser         | Griesser, M., Wagner, G.F., Drobnjak, S.M. and Ekman, J. 2017. Reproductive trade-offs in a long-lived bird species: condition-dependent reproductive allocation maintains female survival and offspring quality. <i>J. Evol. Biol.</i> 30: 782–795.<br>Ekman J, Griesser M. Siberian jays: delayed dispersal in absence of cooperative breeding. In: Koenig WD, Dickinson J, editors. <i>Cooperative breeding in vertebrates: studies of ecology, evolution, and behavior</i> . Cambridge:                                                                                                                                                                                                                                                                |

|            |                          |                            |                                                                                                                                                                                                                                                                                                                                                                                                                                                                |
|------------|--------------------------|----------------------------|----------------------------------------------------------------------------------------------------------------------------------------------------------------------------------------------------------------------------------------------------------------------------------------------------------------------------------------------------------------------------------------------------------------------------------------------------------------|
|            |                          |                            | Cambridge University Press; 2016. p. 6–18.                                                                                                                                                                                                                                                                                                                                                                                                                     |
| <b>121</b> | Phaethon lepturus        | Ramos et al. (2005)        | Ramos, J., Bowler, J., Betts, M., Pacheco, C., Agombar C., Bullock, I., & Monticelli, D. 2005. Productivity of White-tailed Tropicbird on Aride Island, Seychelles. <i>Waterbirds: The International Journal of Waterbird Biology</i> , 28: 405–410.<br>Phillips, H.J. 1985. The breeding biology of White-tailed Tropicbirds <i>Phaethon lepturus</i> at Cousin Island, Seychelles. <i>Ibis</i> 129: 10–24.                                                   |
| <b>122</b> | Phalacrocorax auritus    | Youngren et al. (2018)     | Youngren, S. M., D. C. Rapp, & N. A. Rojek. 2018. Biological monitoring at Aiktak Island, Alaska in 2017. U.S. Fish and Wildl. Serv. Rep., AMNWR 2018/03. Homer, Alaska                                                                                                                                                                                                                                                                                        |
| <b>123</b> | Phalacrocorax capillatus | Watanuki & Ito (2012)      | Watanuki, Y. & Ito, M. 2012. Climatic effects on breeding seabirds of the northern Japan Sea. <i>Marine Ecology Progress Series</i> 454: 183–196.<br>Osa, Y. & Watanuki, Y. 2002. Status of Seabirds Breeding in Hokkaido. <i>Journal of the Yamashina Institute for Ornithology</i> 33: 107–141. Watanuki, Y. & Ito, M. 2012. Climatic effects on breeding seabirds of the northern Japan Sea. <i>Marine Ecology Progress Series</i> 454: 183–196.            |
| <b>124</b> | Phalacrocorax pelagicus  | Youngren et al. (2018)     | Youngren, S. M., D. C. Rapp, & N. A. Rojek. 2018. Biological monitoring at Aiktak Island, Alaska in 2017. U.S. Fish and Wildl. Serv. Rep., AMNWR 2018/03. Homer, Alaska                                                                                                                                                                                                                                                                                        |
| <b>125</b> | Phalacrocorax pelagicus  | Pietrzak et al. (2017)     | Pietrzak, K. W., M. L. Mudge, S. L. Walden, & N. A. Rojek. 2017. Biological monitoring at Buldir Island, Alaska in 2017. U.S. Fish and Wildl. Serv. Rep., AMNWR 2017/17 Homer, Alaska.                                                                                                                                                                                                                                                                         |
| <b>126</b> | Phalacrocorax pelagicus  | Evans et al (2018)         | Evans, S. A., D. J. Schultz, & B. A. Drummond. 2018. Biological monitoring at Saint Lazaria Island, Alaska in 2018. U.S. Fish and Wildl. Serv. Rep., AMNWR 2018/19. Homer, Alaska.                                                                                                                                                                                                                                                                             |
| <b>127</b> | Phalacrocorax pelagicus  | Hatch (2017)               | Hatch, S. 2017. Middleton Island Seabird Research and Monitoring. 2017 Field Report. Institute for Seabird Research and Conservation.                                                                                                                                                                                                                                                                                                                          |
| <b>128</b> | Phalacrocorax urile      | Youngren et al. (2018)     | Youngren, S. M., D. C. Rapp, & N. A. Rojek. 2018. Biological monitoring at Aiktak Island, Alaska in 2017. U.S. Fish and Wildl. Serv. Rep., AMNWR 2018/03. Homer, Alaska                                                                                                                                                                                                                                                                                        |
| <b>129</b> | Phalacrocorax urile      | Pollom et al. (2018)       | Pollom, E. L., J. P. Gorey, & M. D. Romano. 2018. Biological monitoring at St. George Island, Alaska in 2017. U.S. Fish and Wildlife Service. Rep., AMNWR 2018/01. Homer, Alaska.                                                                                                                                                                                                                                                                              |
| <b>130</b> | Phalacrocorax urile      | Mong et al. (2017)         | Mong, R. N. & M. D. Romano. 2017. Biological monitoring at St. Paul Island, Alaska in 2017. U.S. Fish and Wildl. Serv. Rep., AMNWR 2017/16. Homer, Alaska                                                                                                                                                                                                                                                                                                      |
| <b>131</b> | Phalacrocorax urile      | Drummond & Williams (2015) | Drummond, B. A. & J. C. Williams. 2015. Biological monitoring in the central Aleutian Islands, Alaska in 2009-2015. U.S. Fish and Wildl. Serv. Rep., AMNWR 2015/16. Homer, Alaska                                                                                                                                                                                                                                                                              |
| <b>132</b> | Philetaurus socius       | Rita Covas                 | D’Amelio, P. B., Ferreira, A. C., Fortuna, R., Paquet, M., Silva, L. R., Theron, F., Doutrelant, C., & Covas, R. (2022). Disentangling climatic and nest predator impact on reproductive output reveals adverse high-temperature effects regardless of helper number in an arid-region cooperative bird. <i>Ecology Letters</i> 25: 151–162.<br>Fortuna, R., Paquet, M., Ferreira, A. C., Silva, L. R., Theron, F., Doutrelant, C., & Covas, R. 2021. Maternal |

|            |                                |                    |                                                                                                                                                                                                                                                                                                                                                                                                                                                                                                                                                                               |
|------------|--------------------------------|--------------------|-------------------------------------------------------------------------------------------------------------------------------------------------------------------------------------------------------------------------------------------------------------------------------------------------------------------------------------------------------------------------------------------------------------------------------------------------------------------------------------------------------------------------------------------------------------------------------|
|            |                                |                    | allocation in relation to weather, predation and social factors in a colonial cooperative bird. <i>Journal of Animal Ecology</i> 90: 1122–1133.                                                                                                                                                                                                                                                                                                                                                                                                                               |
| <b>133</b> | <i>Phoebastria immutabilis</i> | Donald C. Dearborn | Dearborn, D.C., Anders, A.D., & Flint, E.N. 2001. Trends in reproductive success of Hawaiian seabirds: is guild membership a good criterion for choosing indicator species? <i>Biological Conservation</i> 101: 97–103.                                                                                                                                                                                                                                                                                                                                                       |
| <b>134</b> | <i>Phoebastria nigripes</i>    | Donald C. Dearborn | Dearborn, D.C., Anders, A.D., & Flint, E.N. 2001. Trends in reproductive success of Hawaiian seabirds: is guild membership a good criterion for choosing indicator species? <i>Biological Conservation</i> 101: 97–103.                                                                                                                                                                                                                                                                                                                                                       |
| <b>135</b> | <i>Phoenicurus phoenicurus</i> | Jiří Porkert       | Porkert, J., Gashkov S., Haikola J., Huhta E., Kaisanlahti-Jokimäki M.-L., Kuranov B., Latja R., Mertens R., Numerov A., Rutila J., Sombrutzki A., Zajíc J., Belskii E., Jokimäki J. & Järvinen A. 2014. Variation and long-term trends in the timing of breeding of different Eurasian populations of Common Redstart <i>Phoenicurus phoenicurus</i> . <i>J. Ornithol</i> 155:1045–1057.<br>Porkert, J. & Zajíc, J. 2005. The breeding biology of the common redstart, <i>Phoenicurus phoenicurus</i> , in the Central European pine forest. <i>Folia Zool.</i> 54: 111–122. |
| <b>136</b> | <i>Phoenicurus phoenicurus</i> | Sergey I. Gashkov  | Porkert J., Gashkov S., Haikola J., Huhta E., Kaisanlahti-Körpimäki M.-L., Kuranov B., Latja R., Mertens R., Numerov A., Rutila J., Sombrutzki A., Zajíc J., Belskii E., Jokimäki J. & Järvinen A. 2013. Variation and long-term trends in the timing of breeding of different Eurasian populations of Common Redstart <i>Phoenicurus phoenicurus</i> . <i>J. Ornithol.</i> 155: 1045–1057.                                                                                                                                                                                   |
| <b>137</b> | <i>Plectrophenax nivalis</i>   | Yngve Espmark      | Hoset, K.S. Espmark, Y., Lier, M., Haugen, T., Wedege, M.I., Moksnes, A. 2009. The effect of male mating behavior and food provisioning on breeding success in snow buntings <i>Plectrophenax nyvalis</i> in high Arctic. <i>Polar Biology</i> 32: 1649–1656.<br>Espmark, Y. 2016. Breeding biology of snow buntings ( <i>Plectrophenax nyvalis</i> ) in Svalbard. <i>Trans. R. Norw. Soc. Sci. Lett.</i> 2016(1) 1–36.                                                                                                                                                       |
| <b>138</b> | <i>Podiceps grisegena</i>      | Janusz Kloskowski  | Kloskowski, J. 2003. Brood reduction in the Red-necked Grebe <i>Podiceps grisegena</i> . <i>Ibis</i> 145: 233–243.<br>Bellebaum, J., Szostek, K. L., & Kloskowski, J. 2018. Population dynamics and survival of the Red-necked Grebe <i>Podiceps grisegena</i> : results from a long-term study in eastern Poland. <i>Journal of Ornithology</i> 159: 631–641.                                                                                                                                                                                                                |
| <b>139</b> | <i>Protonotaria citrea</i>     | Jeffrey P. Hoover  | Hoover, J. P. 2003. Decision rules for site fidelity in a migratory bird, the prothonotary warbler. <i>Ecology</i> 84: 416–430.<br>Hoover, J. P. 2006. Water depth influences rates of nest predation for a wetland-dependent bird, the Prothonotary Warbler. <i>Biological Conservation</i> 127: 37–45.                                                                                                                                                                                                                                                                      |
| <b>140</b> | <i>Protonotaria citrea</i>     | Lesley Bulluck     | Bulluck, L., Huber, S., Viverette, C. & Blem, C. 2013. Age-specific responses to spring temperature in a migratory songbird: older females attempt more broods in warmer springs. <i>Ecology and Evolution</i> 3: 3298–3306.                                                                                                                                                                                                                                                                                                                                                  |
| <b>141</b> | <i>Pygoscelis adeliae</i>      | Louise M. Emmerson | Emmerson, L. & Southwell, C. 2008. Sea ice cover and its influence on Adélie penguin reproductive performance <i>Ecology</i> 89: 2096–2102.<br>Emmerson, L. & Southwell, C. 2022. Environment-triggered demographic changes cascade and compound to propel a dramatic decline of an Antarctic seabird metapopulation. <i>Global Change Biology.</i> 00: 1–16. doi: 10.1111/gcb.16437                                                                                                                                                                                          |

|     |                        |                            |                                                                                                                                                                                                                                                                                                                                                                                                                                                          |
|-----|------------------------|----------------------------|----------------------------------------------------------------------------------------------------------------------------------------------------------------------------------------------------------------------------------------------------------------------------------------------------------------------------------------------------------------------------------------------------------------------------------------------------------|
| 142 | Pygoscelis adeliae     | Michael J. Dunn            | Dunn MJ, Jackson JA, Adlard S, Lynnes AS, Briggs DR, Fox D, et al. 2016. Population Size and Decadal Trends of Three Penguin Species Nesting at Signy Island, South Orkney Islands. PLoS ONE 11(10): e0164025.                                                                                                                                                                                                                                           |
| 143 | Pygoscelis antarcticus | Małgorzata Korczak-Abshire | CCAMLR. 2014. Ecosystem monitoring program: standard methods. Standard Method A3A, A9: Penguins: Adélie, chinstrap, gentoo, macaroni (Pygoscelis adeliae, Pygoscelis antarcticus, Pygoscelis papua, Eudyptes chrysolophus) parameters: breeding population size. Commission for the Conservation of Antarctic Marine Living Resources, Hobart, p 233.                                                                                                    |
| 144 | Rissa brevirostris     | Pietrzak et al. (2017)     | Pietrzak, K. W., M. L. Mudge, S. L. Walden, & N. A. Rojek. 2017. Biological monitoring at Buldir Island, Alaska in 2017. U.S. Fish and Wildl. Serv. Rep., AMNWR 2017/17 Homer, Alaska.                                                                                                                                                                                                                                                                   |
| 145 | Rissa brevirostris     | Pollom et al. (2018)       | Pollom, E. L., J. P. Gorey, & M. D. Romano. 2018. Biological monitoring at St. George Island, Alaska in 2017. U.S. Fish and Wildlife Service. Rep., AMNWR 2018/01. Homer, Alaska.                                                                                                                                                                                                                                                                        |
| 146 | Rissa brevirostris     | Mong et al. (2017)         | Mong, R. N. a& M. D. Romano. 2017. Biological monitoring at St. Paul Island, Alaska in 2017. U.S. Fish and Wildl. Serv. Rep., AMNWR 2017/16. Homer, Alaska                                                                                                                                                                                                                                                                                               |
| 147 | Rissa tridactyla       | Turner (2010, 2015)        | Turner, D.M. 2010. Counts and breeding success of Black-legged Kittiwakes <i>Rissa tridactyla</i> nesting on man-made structures along the River Tyne, northeast England, 1994-2009, <i>Seabird</i> 23: 111 – 126.<br>Turner, D.M. 2015. Summary of Black-legged Kittiwake <i>Rissa tridactyla</i> breeding data recorded on the River Tyne, northeast England, during 2010 – 2015. Natural History Society of Northumbria website (www.nhsn.ncl.ac.uk). |
| 148 | Rissa tridactyla       | Robert T. Barrett          | Ponchon, A., D. Grémillet, S. Christensen-Dalsgaard, K. E. Erikstad, R. T. Barrett, T. K. Reiertsen, K. D. McCoy, T. Tveraa, and T. Boulinier. 2014. When things go wrong: intra-season dynamics of breeding failure in a seabird. <i>Ecosphere</i> 5: 4.                                                                                                                                                                                                |
| 149 | Rissa tridactyla       | Mong et al. (2017)         | Mong, R. N. & M. D. Romano. 2017. Biological monitoring at St. Paul Island, Alaska in 2017. U.S. Fish and Wildl. Serv. Rep., AMNWR 2017/16. Homer, Alaska                                                                                                                                                                                                                                                                                                |
| 150 | Rissa tridactyla       | Murphy et al. (2016)       | Murphy E.C., Roseneau D.G., Springer A.M. & Byrd G.V. 2016. Breeding chronology and productivity of Black-legged Kittiwakes <i>Rissa tridactyla</i> at Bluff, Alaska, 1975–2008: Associations with regional environmental indices and distant colonies. <i>Marine Ornithology</i> 44: 183–201.                                                                                                                                                           |
| 151 | Rissa tridactyla       | Pietrzak et al. (2017)     | Pietrzak, K. W., M. L. Mudge, S. L. Walden, & N. A. Rojek. 2017. Biological monitoring at Buldir Island, Alaska in 2017. U.S. Fish and Wildl. Serv. Rep., AMNWR 2017/17 Homer, Alaska.                                                                                                                                                                                                                                                                   |
| 152 | Rissa tridactyla       | Dragoo et al. (2017)       | Dragoo, D. E., G. Thomson, & M. D. Romano. 2017. Biological monitoring at Cape Lisburne, Alaska in 2017. U. S. Fish and Wildl. Serv. Report AMNWR 2017/15. Homer, Alaska.                                                                                                                                                                                                                                                                                |
| 153 | Rissa tridactyla       | Evans et al (2017)         | Evans, S. A., D. J. Schultz, & B. A. Drummond. 2018. Biological monitoring at Saint Lazaria Island, Alaska in 2018. U.S. Fish and Wildl. Serv. Rep., AMNWR 2018/19. Homer, Alaska.                                                                                                                                                                                                                                                                       |
| 154 | Rissa tridactyla       | Kettle (2017)              | Kettle, A.B. 2017. Biological monitoring at East Amatuli Island, Alaska in 2016. U.S. Fish and Wildlife Service Report, AMNWR 2017/08. Homer, Alaska                                                                                                                                                                                                                                                                                                     |

|            |                             |                            |                                                                                                                                                                                                                                                                                                                                                                                                                                                                                                                                                                                                                                                                                                                                                                                                                                                                                                                                                                                                                                                                                                                                                             |
|------------|-----------------------------|----------------------------|-------------------------------------------------------------------------------------------------------------------------------------------------------------------------------------------------------------------------------------------------------------------------------------------------------------------------------------------------------------------------------------------------------------------------------------------------------------------------------------------------------------------------------------------------------------------------------------------------------------------------------------------------------------------------------------------------------------------------------------------------------------------------------------------------------------------------------------------------------------------------------------------------------------------------------------------------------------------------------------------------------------------------------------------------------------------------------------------------------------------------------------------------------------|
| <b>155</b> | <i>Rissa tridactyla</i>     | Pollom et al. (2018)       | Pollom, E. L., J. P. Gorey, & M. D. Romano. 2018. Biological monitoring at St. George Island, Alaska in 2017. U.S. Fish and Wildlife Service. Rep., AMNWR 2018/01. Homer, Alaska.                                                                                                                                                                                                                                                                                                                                                                                                                                                                                                                                                                                                                                                                                                                                                                                                                                                                                                                                                                           |
| <b>156</b> | <i>Rissa tridactyla</i>     | Hatch (2017)               | Hatch, S. 2017. Middleton Island Seabird Research and Monitoring. 2017 Field Report. Institute for Seabird Research and Conservation.                                                                                                                                                                                                                                                                                                                                                                                                                                                                                                                                                                                                                                                                                                                                                                                                                                                                                                                                                                                                                       |
| <b>157</b> | <i>Rissa tridactyla</i>     | Elena Yu. Golubova         | Golubova E.Yu. 2018. Population numbers, phenology and productivity of the Black-legged kittiwake ( <i>Rissa tridactyla</i> , CHARADRIIFORMES, LARIDAE) from Tauskaya bay, sea of Okhotsk // Zoologicheskii zhurnal 97: 32–55.<br><br>During the nest visit the researcher was on the opposite slope (at a distance of 10-30 m) and examines a colony in the "top-down" direction with binoculars. For each site of the colony photographs were taken in advance where all known nests of kittiwakes are subsequently noted. Sites were visited every 3 days if possible. We recorded the presence of adult birds, the presence of clutch or chicks. We noted the number of eggs laid, hatched and fledglings in each nest. Average clutch size was determined by the ratio of the total number of eggs laid to the number of nests with clutches. The ratio of the number of fledglings to the number of pairs with clutches was used as a parameter of breeding success. The productivity of the kittiwake was assessed by the ratio of the number of fledglings to the total number of pairs with nests, including pairs that did not start laying eggs. |
| <b>158</b> | <i>Rissa tridactyla</i>     | Drummond & Williams (2015) | Drummond, B. A. & J. C. Williams. 2015. Biological monitoring in the central Aleutian Islands, Alaska in 2009-2015. U.S. Fish and Wildl. Serv. Rep., AMNWR 2015/16. Homer, Alaska                                                                                                                                                                                                                                                                                                                                                                                                                                                                                                                                                                                                                                                                                                                                                                                                                                                                                                                                                                           |
| <b>159</b> | <i>Somateria fischeri</i>   | Diana V. Solovyeva         | Solovyeva D.V., Vartanyan S.L., Frederiksen M., Fox A.D. 2018. Changes in nesting success and breeding abundance of Spectacled eiders <i>Somateria fischeri</i> in the Chaun delta, Chukotka, Russia, 2003–2016. Polar Biology 41: 743–751.                                                                                                                                                                                                                                                                                                                                                                                                                                                                                                                                                                                                                                                                                                                                                                                                                                                                                                                 |
| <b>160</b> | <i>Somateria mollissima</i> | Markus Öst                 | Mohring, B., Angelier, F., Jaatinen, K., Steele, B., Lönnberg, E. & Öst, M. 2022: Drivers of within- and among-individual variation in risk-taking behaviour during reproduction in a long-lived bird. Proceedings of the Royal Society B: Biological Sciences 289: 20221338.<br><br>Öst, M., Lindén, A., Karell, P. Ramula, S. & Kilpi, M. 2018: To breed or not to breed: drivers of intermittent breeding in a seabird under increasing predation risk and male bias. Oecologia 188:129–138.                                                                                                                                                                                                                                                                                                                                                                                                                                                                                                                                                                                                                                                             |
| <b>161</b> | <i>Sterna dougallii</i>     | Seward et al. (2018)       | Seward, A., Ratcliffe, N., Newton, S. et al. 2019. Metapopulation dynamics of roseate terns: Sources, sinks and implications for conservation management decisions. J. Anim. Ecol. 88: 138–153.                                                                                                                                                                                                                                                                                                                                                                                                                                                                                                                                                                                                                                                                                                                                                                                                                                                                                                                                                             |
| <b>162</b> | <i>Sterna dougallii</i>     | Seward et al. (2018)       | Seward, A., Ratcliffe, N., Newton, S. et al. 2019. Metapopulation dynamics of roseate terns: Sources, sinks and implications for conservation management decisions. J. Anim. Ecol. 88: 138–153.                                                                                                                                                                                                                                                                                                                                                                                                                                                                                                                                                                                                                                                                                                                                                                                                                                                                                                                                                             |
| <b>163</b> | <i>Sterna dougallii</i>     | Seward et al. (2018)       | Seward, A., Ratcliffe, N., Newton, S. et al. 2019. Metapopulation dynamics of roseate terns: Sources, sinks and implications for conservation management decisions. J. Anim. Ecol. 88: 138–153.                                                                                                                                                                                                                                                                                                                                                                                                                                                                                                                                                                                                                                                                                                                                                                                                                                                                                                                                                             |
| <b>164</b> | <i>Sterna dougallii</i>     | Jaime A. Ramos             | Ramos, J.A. & Monticelli, D. 2007. Long-term studies on productivity of Roseate Terns and Lesser Noddies on Aride Island, Seychelles. Ostrich 78: 443–447.<br><br>Ramos, J. A., A. M. Maul, V. Ayrton, I. Bullock, J. Hunter, J. Bowler, G. Castle, R. Mileto & C. Pacheco. 2002. The                                                                                                                                                                                                                                                                                                                                                                                                                                                                                                                                                                                                                                                                                                                                                                                                                                                                       |

|     |                         |                   |                                                                                                                                                                                                                                                                                                                                                                                                                                                                                                                                                                                                                                                                                                                                                                                                                                                        |
|-----|-------------------------|-------------------|--------------------------------------------------------------------------------------------------------------------------------------------------------------------------------------------------------------------------------------------------------------------------------------------------------------------------------------------------------------------------------------------------------------------------------------------------------------------------------------------------------------------------------------------------------------------------------------------------------------------------------------------------------------------------------------------------------------------------------------------------------------------------------------------------------------------------------------------------------|
|     |                         |                   | influence of local and large scale weather events and timing of breeding on tropical Roseate Tern reproductive parameters. <i>Marine Ecology Progress Series</i> 243: 271–279.                                                                                                                                                                                                                                                                                                                                                                                                                                                                                                                                                                                                                                                                         |
| 165 | <i>Sterna hirundo</i>   | Peter H. Becker   | Becker P.H., Wendeln H., González-Solís J. 2001. Population dynamics, recruitment, individual quality and reproductive strategies in Common Terns marked with transponders. <i>Ardea</i> 89: 239–250.<br>Becker P.H. 2010. Populationsökologie der Flusseeeschwalbe: Das Individuum im Blickpunkt. In Bairlein F, Becker PH (eds) 100 Jahre Institut für Vogelforschung „Vogelwarte Helgoland“. Aula, Wiebelsheim, p 137–155.<br>The walls surrounding the islands make it easy to specify hatching and fledging success and the fate of older chicks. There is almost no predation on old chicks. If during a check marked chicks are no longer found present on the breeding islands (alive or dead) and if they also are not found dead later in the surroundings of the colony they are recorded as fledged (min fledging age is 18 d, mean 27 d). |
| 166 | <i>Strix aluco</i>      | Tapio Solonen     | Solonen, T. & Ursin, K. 2008: Breeding of Tawny Owls <i>Strix aluco</i> in rural and urban habitats in southern Finland. <i>Bird Study</i> 55: 216–221.                                                                                                                                                                                                                                                                                                                                                                                                                                                                                                                                                                                                                                                                                                |
| 167 | <i>Strix aluco</i>      | Patrik Karell     | Morosinotto, C., Ahola, K., Karstinen, T., Aaltonen, E., Brommer, J.E., Lindqvist, A. & Karell, P. 2020. Fledging mass is color morph specific and affects local recruitment in a wild bird. <i>American Naturalist</i> , 196: 609–619.<br>Karell, P., Ahola, K., Karstinen, T., Zolei, A. & Brommer, J.E. 2009. Population dynamics in a cyclic environment: Consequences of cyclic food abundance on tawny owl reproduction and survival. <i>Journal of Animal Ecology</i> 78: 150–162.                                                                                                                                                                                                                                                                                                                                                              |
| 168 | <i>Strix aluco</i>      | Xavier Lambin     | Millon, A., Petty, S. J. & Lambin, X. 2010. Pulsed resources affect the timing of first breeding and lifetime reproductive success of tawny owls. <i>Journal of Animal Ecology</i> 79: 426–435.<br>Millon A, SJ Petty, B Little & X Lambin. 2011. Natal conditions alter age-specific reproduction but not survival or senescence in a long-lived bird of prey. <i>Journal of Animal Ecology</i> 80: 968–75.                                                                                                                                                                                                                                                                                                                                                                                                                                           |
| 169 | <i>Strix uralensis</i>  | Hannu Pietiäinen  | Pietiäinen, H. 1989: Seasonal and individual variation in the production of offspring in the Ural Owl <i>Strix uralensis</i> . <i>J. Anim. Ecol.</i> 58: 905–920.<br>Brommer, J., Pietiäinen, H. & Kolunen, H. 1998. The effect of age at first breeding on Ural Owl lifetime reproductive success and fitness under cyclic food conditions. <i>J. Anim. Ecol.</i> 67: 359–369.                                                                                                                                                                                                                                                                                                                                                                                                                                                                        |
| 170 | <i>Sturnus unicolor</i> | Vicente Polo      | J.P. Veiga, V. Polo, A. Salvador & M.B. Morales. 2002. El estornino negro- <i>Sturnus unicolor</i> . In: Enciclopedia Virtual de los vertebrados españoles (L.M. Carrascal & A. Salvador). Madrid. Museo Nacional de Ciencias Naturales see <a href="http://www.vertebradosibericos.org/aves/habitat/stuuniha.html">http://www.vertebradosibericos.org/aves/habitat/stuuniha.html</a> .<br>V. Polo, J.P. Veiga, P.J. Cordero, J. Viñuela, P. Monaghan. 2004. Female starlings adjust primary sex ratio in response to aromatic plants in the nest. <i>Proc. R. Soc. Lond. B.</i> 271: 1929–1933.                                                                                                                                                                                                                                                       |
| 171 | <i>Sturnus vulgaris</i> | Alexander Numerov | Numerov, A.D. 2007. Species composition and population dynamics of nest boxes birds in Usmansky Bor. <i>Proceedings of the Voronezh State Reserve</i> 25: 193–205.                                                                                                                                                                                                                                                                                                                                                                                                                                                                                                                                                                                                                                                                                     |
| 172 | <i>Sula nebouxii</i>    | Hugh Drummond     | Drummond, H., R. Torres & V.V. Krishnan. 2003. Buffered development: resilience after aggressive subordination in infancy. <i>American Naturalist</i> 161: 794–807.                                                                                                                                                                                                                                                                                                                                                                                                                                                                                                                                                                                                                                                                                    |

|            |                           |                          |                                                                                                                                                                                                                                                                                                                                                                                                                                                                                                                                                                           |
|------------|---------------------------|--------------------------|---------------------------------------------------------------------------------------------------------------------------------------------------------------------------------------------------------------------------------------------------------------------------------------------------------------------------------------------------------------------------------------------------------------------------------------------------------------------------------------------------------------------------------------------------------------------------|
| <b>173</b> | Synthliboramphus antiquus | Youngren et al. (2018)   | Youngren, S. M., D. C. Rapp, & N. A. Rojek. 2018. Biological monitoring at Aiktak Island, Alaska in 2017. U.S. Fish and Wildl. Serv. Rep., AMNWR 2018/03. Homer, Alaska.                                                                                                                                                                                                                                                                                                                                                                                                  |
| <b>174</b> | Synthliboramphus antiquus | Elena Yu. Golubova       | Golubova E.Yu. 2017. Breeding Biology of the Parakeet Auklet ( <i>Cyclorhynchus psittacula</i> ) on Talan Island (Northern Sea of Okhotsk). <i>Biology Bulletin</i> 44: 735–750.<br>Golubova E.Yu. 2011. Monitoring of the Ancient murrelet ( <i>Synthliboramphus antiquus</i> ) population in the northern sea of Okhotsk. <i>Zoologicheskiy zhurnal</i> 90: 1216–1229.                                                                                                                                                                                                  |
| <b>175</b> | Tachycineta bicolor       | Michael P. Lombardo      | Lombardo, M. P., P. A. Thorpe, Sango Otieno, Alyssa Hawker, Dan Welgarz, Danielle Andrews & A. Black. 2020. Yearly variation in factors associated with local recruitment of Tree Swallows. <i>Journal of Field Ornithology</i> 91: 199–213.<br>Lombardo, M. P., P. A. Thorpe, S. Otieno, D. Welgarz, & A. Hawker. 2021. Factors associated with egg mass in Tree Swallows ( <i>Tachycineta bicolor</i> ) varied yearly from 2008-2016 in Michigan. <i>Journal of Avian Biology</i> 52: <a href="https://doi.org/10.1111/jav.02460">https://doi.org/10.1111/jav.02460</a> |
| <b>176</b> | Tachycineta bicolor       | Nathaniel T. Wheelwright | Wheelwright, N.T., & C. Teplitsky. 2017. Divorce in Savannah sparrows: causes, consequences and lack of inheritance. <i>The American Naturalist</i> 190: 557–569.<br>Wheelwright, N.T., C.R. Freeman-Gallant, and R.A. Mauck. 2006. Asymmetrical incest avoidance in the choice of social and genetic mates. <i>Animal Behaviour</i> 71: 631–639.                                                                                                                                                                                                                         |
| <b>177</b> | Tachymarptis melba        | Pierre Bize              | Bize, P., Devevey, G., Monaghan, P., Doligez, B., & Christe, P. 2008. Fecundity and survival in relation to resistance to oxidative stress in a free living bird. <i>Ecology</i> 89: 2584–2593.                                                                                                                                                                                                                                                                                                                                                                           |
| <b>178</b> | Tachymarptis melba        | Pierre Bize              | Bize, P., Devevey, G., Monaghan, P., Doligez, B., & Christe, P. 2008. Fecundity and survival in relation to resistance to oxidative stress in a free living bird. <i>Ecology</i> 89, 2584–2593.                                                                                                                                                                                                                                                                                                                                                                           |
| <b>179</b> | Tetrao tetrix             | Wegge & Rolstad (2017)   | Wegge P. & Rolstad J. 2017. Climate change and bird reproduction: warmer springs benefit breeding success in boreal forest grouse. <i>Proc. R. Soc. B</i> 284: 20171528.                                                                                                                                                                                                                                                                                                                                                                                                  |
| <b>180</b> | Tetrao urogallus          | Wegge & Rolstad (2017)   | Wegge P. & Rolstad J. 2017. Climate change and bird reproduction: warmer springs benefit breeding success in boreal forest grouse. <i>Proc. R. Soc. B</i> 284: 20171528.                                                                                                                                                                                                                                                                                                                                                                                                  |
| <b>181</b> | Tetrao urogallus          | Moss et al. (2001)       | Moss, R., Oswald, J., & Baines, D. 2001. Climate Change and Breeding Success: Decline of the Capercaillie in Scotland. <i>Journal of Animal Ecology</i> 70: 47–61.                                                                                                                                                                                                                                                                                                                                                                                                        |
| <b>182</b> | Thalassarche chrysostoma  | Richard A. Phillips      | Pardo, D., Forcada, J., Wood, A.G., Tuck, G.N., Ireland, L., Pradel, R., J.P. Croxall & Phillips, R.A. 2017. Additive effects of climate and fisheries drive catastrophic declines in multiple albatross species. <i>Proceedings of the National Academy of Science of the United States of America</i> 114, E10829-E10837.                                                                                                                                                                                                                                               |
| <b>183</b> | Thalassarche melanophris  | Richard A. Phillips      | Pardo, D., Forcada, J., Wood, A.G., Tuck, G.N., Ireland, L., Pradel, R., J.P. Croxall & Phillips, R.A. 2017. Additive effects of climate and fisheries drive catastrophic declines in multiple albatross species. <i>Proceedings of the National Academy of Science of the United States of America</i> 114, E10829-E10837.                                                                                                                                                                                                                                               |
| <b>184</b> | Troglodytes aedon         | E. Keith Bowers          | Bowers et al. 2016. Spring temperatures influence selection on breeding date and the potential for phenological                                                                                                                                                                                                                                                                                                                                                                                                                                                           |



|     |                      |                        |                                                                                                                                                                                                                                                                                                                                                                                                                                                                                                                                                                                                                                                                                                                                                                                                                                                                                           |
|-----|----------------------|------------------------|-------------------------------------------------------------------------------------------------------------------------------------------------------------------------------------------------------------------------------------------------------------------------------------------------------------------------------------------------------------------------------------------------------------------------------------------------------------------------------------------------------------------------------------------------------------------------------------------------------------------------------------------------------------------------------------------------------------------------------------------------------------------------------------------------------------------------------------------------------------------------------------------|
|     |                      |                        | mismatch in a migratory bird. <i>Ecology</i> 97: 2880–2891.<br>Bowers et al. 2019. Condition-dependent begging elicits increased parental investment in a wild bird population. <i>Am Nat.</i> 193: 725–737.                                                                                                                                                                                                                                                                                                                                                                                                                                                                                                                                                                                                                                                                              |
| 185 | <i>Turdus merula</i> | Dariusz Wysocki        | Wysocki, D., Cholewa, M. & Jankowiak, Ł. 2017. Fledgling adoption in European Blackbirds: an unrecognized phenomenon in a well-known species. <i>Behav. Ecol.</i> 29, 230–235.<br>Jankowiak, Ł., Zyskowski, D. & Wysocki, D. 2017. Age-specific reproduction and disposable soma in an urban population of common blackbirds <i>Turdus merula</i> . <i>Ibis</i> 160: 130–144.                                                                                                                                                                                                                                                                                                                                                                                                                                                                                                             |
| 186 | <i>Tyto alba</i>     | Alexandre Roulin       | Frey, C., Sonnay C., Dreiss, A.N., Roulin, A. 2011. Habitat, breeding performance, diet and individual age in Swiss barn owls ( <i>Tyto alba</i> ). <i>J. Ornithol.</i> 152: 279–290.                                                                                                                                                                                                                                                                                                                                                                                                                                                                                                                                                                                                                                                                                                     |
| 187 | <i>Tyto alba</i>     | Motti Charter          | Charter M., Izhaki I., Leshem, Y., Meyrom K., and A Roulin 2017. The relationship between weather and reproduction of the barn owl <i>Tyto alba</i> in a semi-arid agricultural landscape in Israel. <i>Avian Biology Research</i> 10: 253-258.<br>Charter M. and G. Rozman. 2022. The importance of nest box placement for Barn Owls ( <i>Tyto alba</i> ) nesting in Israel. <i>Animals</i> 12(20), p.2815.                                                                                                                                                                                                                                                                                                                                                                                                                                                                              |
| 188 | <i>Uria aalge</i>    | Michael P. Harris      | Harris, M.P., Wanless, S. 1988. The breeding biology of Guillemots <i>Uria aalge</i> on the Isle of May over a six-year period. <i>Ibis</i> 130: 172–192.                                                                                                                                                                                                                                                                                                                                                                                                                                                                                                                                                                                                                                                                                                                                 |
| 189 | <i>Uria aalge</i>    | Mong et al. (2017)     | Mong, R. N. & M. D. Romano. 2017. Biological monitoring at St. Paul Island, Alaska in 2017. U.S. Fish and Wildl. Serv. Rep., AMNWR 2017/16. Homer, Alaska                                                                                                                                                                                                                                                                                                                                                                                                                                                                                                                                                                                                                                                                                                                                 |
| 190 | <i>Uria aalge</i>    | Youngren et al. (2018) | Youngren, S. M., D. C. Rapp, & N. A. Rojek. 2018. Biological monitoring at Aiktak Island, Alaska in 2017. U.S. Fish and Wildl. Serv. Rep., AMNWR 2018/03. Homer, Alaska                                                                                                                                                                                                                                                                                                                                                                                                                                                                                                                                                                                                                                                                                                                   |
| 191 | <i>Uria aalge</i>    | Evans et al (2017)     | Evans, S. A., D. J. Schultz, & N. A. Rojek. 2017. Biological monitoring at Chowiet Island, Alaska in 2017. U.S. Fish and Wildl. Serv. Rep., AMNWR 2017/18. Homer, Alaska.                                                                                                                                                                                                                                                                                                                                                                                                                                                                                                                                                                                                                                                                                                                 |
| 192 | <i>Uria aalge</i>    | Evans et al (2018)     | Evans, S. A., D. J. Schultz, & B. A. Drummond. 2018. Biological monitoring at Saint Lazaria Island, Alaska in 2018. U.S. Fish and Wildl. Serv. Rep., AMNWR 2018/19. Homer, Alaska.                                                                                                                                                                                                                                                                                                                                                                                                                                                                                                                                                                                                                                                                                                        |
| 193 | <i>Uria aalge</i>    | Pollom et al. (2018)   | Pollom, E. L., J. P. Gorey, and M. D. Romano. 2018. Biological monitoring at St. George Island, Alaska in 2017. U.S. Fish and Wildlife Service. Rep., AMNWR 2018/01. Homer, Alaska.                                                                                                                                                                                                                                                                                                                                                                                                                                                                                                                                                                                                                                                                                                       |
| 194 | <i>Uria aalge</i>    | Elena Yu. Golubova     | Golubova E. Yu. 2014. Monitoring of the Common murre ( <i>Uria aalge</i> ) and Thick-billed murre ( <i>Uria lomvia</i> ) populations from Tauiskaya bay, the sea of Okhotsk. <i>Zoologicheskii zhurnal</i> 93: 1086–1105.<br>Birkhead T.R., Nettleship D.N., 1980. Census method for murre, <i>Uria</i> species: a unified approach. <i>Canadian Wildlife Service: Occasional Paper</i> 43: 4–22.).<br>For each site of the colony photographs were taken in advance where all known nests of guillemots were subsequently noted. To examine the nest content a researcher visited the opposite slope (at a distance of 10-30 m) and examined a colony in the "top-down" direction with binoculars. Sites were visited every 3 days if possible. We recorded the presence of adult birds, the presence of clutch or chicks. The success of breeding was the ratio of the number of chicks |

|            |             |                        |                                                                                                                                                                                                                                                                                                                                                                                                                                                                                                                                                                                                                                                                                                                                                                                                                                                                                                                                                                                                                                                                                                                                     |
|------------|-------------|------------------------|-------------------------------------------------------------------------------------------------------------------------------------------------------------------------------------------------------------------------------------------------------------------------------------------------------------------------------------------------------------------------------------------------------------------------------------------------------------------------------------------------------------------------------------------------------------------------------------------------------------------------------------------------------------------------------------------------------------------------------------------------------------------------------------------------------------------------------------------------------------------------------------------------------------------------------------------------------------------------------------------------------------------------------------------------------------------------------------------------------------------------------------|
|            |             |                        | leaving to the sea to the total number of nests with eggs. The productivity of guillemots was estimated by the ratio of the number of chicks leaving to the sea to the total number of pairs with nests including those that did not lay eggs.                                                                                                                                                                                                                                                                                                                                                                                                                                                                                                                                                                                                                                                                                                                                                                                                                                                                                      |
| <b>195</b> | Uria lomvia | Pollom et al. (2018)   | Pollom, E. L., J. P. Gorey, and M. D. Romano. 2018. Biological monitoring at St. George Island, Alaska in 2017. U.S. Fish and Wildlife Service. Rep., AMNWR 2018/01. Homer, Alaska.                                                                                                                                                                                                                                                                                                                                                                                                                                                                                                                                                                                                                                                                                                                                                                                                                                                                                                                                                 |
| <b>196</b> | Uria lomvia | Mong et al. (2017)     | Mong, R. N. and M. D. Romano. 2017. Biological monitoring at St. Paul Island, Alaska in 2017. U.S. Fish and Wildl. Serv. Rep., AMNWR 2017/16. Homer, Alaska.                                                                                                                                                                                                                                                                                                                                                                                                                                                                                                                                                                                                                                                                                                                                                                                                                                                                                                                                                                        |
| <b>197</b> | Uria lomvia | Youngren et al. (2018) | Youngren, S. M., D. C. Rapp, and N. A. Rojek. 2018. Biological monitoring at Aiktak Island, Alaska in 2017. U.S. Fish and Wildl. Serv. Rep., AMNWR 2018/03. Homer, Alaska.                                                                                                                                                                                                                                                                                                                                                                                                                                                                                                                                                                                                                                                                                                                                                                                                                                                                                                                                                          |
| <b>198</b> | Uria lomvia | Pietrzak et al. (2017) | Pietrzak, K. W., M. L. Mudge, S. L. Walden, and N. A. Rojek. 2017. Biological monitoring at Buldir Island, Alaska in 2017. U.S. Fish and Wildl. Serv. Rep., AMNWR 2017/17 Homer, Alaska.                                                                                                                                                                                                                                                                                                                                                                                                                                                                                                                                                                                                                                                                                                                                                                                                                                                                                                                                            |
| <b>199</b> | Uria lomvia | Evans et al. (2017)    | Evans, S. A., D. J. Schultz, and N. A. Rojek. 2017. Biological monitoring at Chowiet Island, Alaska in 2017. U.S. Fish and Wildl. Serv. Rep., AMNWR 2017/18. Homer, Alaska.                                                                                                                                                                                                                                                                                                                                                                                                                                                                                                                                                                                                                                                                                                                                                                                                                                                                                                                                                         |
| <b>200</b> | Uria lomvia | Evans et al. (2018)    | Evans, S. A., D. J. Schultz, & B. A. Drummond. 2018. Biological monitoring at Saint Lazaria Island, Alaska in 2018. U.S. Fish and Wildl. Serv. Rep., AMNWR 2018/19. Homer, Alaska.                                                                                                                                                                                                                                                                                                                                                                                                                                                                                                                                                                                                                                                                                                                                                                                                                                                                                                                                                  |
| <b>201</b> | Uria lomvia | Elena Yu. Golubova     | <p>Golubova E. Yu. 2014. Monitoring of the Common murre (<i>Uria aalge</i>) and Thick-billed murre (<i>Uria lomvia</i>) populations from Tauiskaya bay, the sea of Okhotsk. Zoologicheskij zhurnal 93: 1086–1105.</p> <p>Birkhead T.R., Nettleship D.N., 1980. Census method for murre, <i>Uria</i> species: a unified approach. Canadian Wildlife Service: Occasional Paper 43: 4–22.</p> <p>For each site of the colony photographs were taken in advance where all known nests of guillemots were subsequently noted. To examine the nest content a researcher visited the opposite slope (at a distance of 10-30 m) and examined a colony in the "top-down" direction with binoculars. Sites were visited every 3 days if possible. We recorded the presence of adult birds, the presence of clutch or chicks. The success of breeding was the ratio of the number of chicks leaving to the sea to the total number of nests with eggs. The productivity of guillemots was estimated by the ratio of the number of chicks leaving to the sea to the total number of pairs with nests including those that did not lay eggs.</p> |

**Table S5.** List of variables used in the statistical analyses.

| Variable                             | Role      | Description                                                                                 |
|--------------------------------------|-----------|---------------------------------------------------------------------------------------------|
| Changes in productivity              | response  | Change in mean number of offspring per female, measured in SDs per year                     |
| Changes in clutch size               | response  | Change in mean clutch size, measured in SDs per year                                        |
| Changes in nest success              | response  | Change in proportion of successful nesting attempts, measured in percentage points per year |
| Changes in date of first egg         | response  | Change in mean date of the season start, measured in days per year                          |
| Changes in duration of laying period | response  | Change in duration of laying period, measured in days per year                              |
| Changes in population density        | predictor | Change in number of breeding pairs                                                          |
| ln(body mass)                        | predictor | Natural logarithm of female body mass                                                       |
| Number of broods                     | predictor | Discrete: single- or multi-brooded species                                                  |
| Migratory habits                     | predictor | Discrete: sedentary or migratory species                                                    |
| Absolute latitude                    | predictor | Distance from the equator measured in latitude degrees, rounded to whole numbers            |
| Type of environment                  | predictor | Discrete, depending on foraging habitat: sea, freshwater and land species                   |
| Human Footprint Index                | predictor | Degree of anthropogenic pressure on habitat, measured in arbitrary units (interval scale)   |
| Changes in local temperatures        | predictor | Change in mean temperature, measured in °C per year                                         |
| Changes in local precipitation       | predictor | Change in mean precipitation, measured in mm per year                                       |

**Table S6.** Acknowledgments.

We are grateful to our most important collaborators who helped us to collect the data on the study species, as well as funding institutions, other institutions we collaborated with, and some meteorological stations that allowed us to use their data. Population IDs correspond with numbers provided elsewhere in the manuscript. In the third column the author responsible for the data set is mentioned or the reference to the literature data (in red).

| Pop. ID | Species                        | Author/ <b>Literature data</b> | Main collaborators                                                                                                                           | Funding Institutions (grant numbers), other institutions & meteorological stations                                                                                                                                                                                                                            |
|---------|--------------------------------|--------------------------------|----------------------------------------------------------------------------------------------------------------------------------------------|---------------------------------------------------------------------------------------------------------------------------------------------------------------------------------------------------------------------------------------------------------------------------------------------------------------|
| 1       | <i>Accipiter cooperi</i>       | Robert N. ROSENFELD            | John BIELEFELDT (Deceased)                                                                                                                   |                                                                                                                                                                                                                                                                                                               |
| 2       | <i>Accipiter gentilis</i>      | Jan T. NIELSEN                 |                                                                                                                                              |                                                                                                                                                                                                                                                                                                               |
| 3       | <i>Accipiter gentilis</i>      | Jere TOLVANEN                  | Risto TORNBERG                                                                                                                               |                                                                                                                                                                                                                                                                                                               |
| 4       | <i>Accipiter nisus</i>         | Jan T. NIELSEN                 |                                                                                                                                              |                                                                                                                                                                                                                                                                                                               |
| 5       | <i>Acrocephalus scirpaceus</i> | Lucyna HALUPKA                 | Marta BOROWIEC, Ewelina KLIMCZUK, Hanna SZTIWERTNIA                                                                                          | Polish National Science Centre (2017/27/B/NZ8/00465); Polish Ministry of Education and Science (2 P04F 053 30)                                                                                                                                                                                                |
| 6       | <i>Aegolius funereus</i>       | Markéta ZÁRYBNICKÁ             | Karel ŠŤASTNÝ, Jan ZÁRYBNICKÝ, Jiří ŠINDELÁŘ, Richard ŠEVČÍK, Alena HÝLOVÁ, Marek KOUBA, Václav TOMÁŠEK, Jan HANEL, Petra SLÁMOVÁ, Petr HOLÝ | The Faculty of Environmental Sciences CULS Prague; The Czech University of Life Sciences Prague; The Forests of the Czech Republic; EEA – Iceland, Liechtenstein, and Norway grants; The Ministry of the Environment of the Czech Republic; The Ministry of Education, Youth and Sports of the Czech Republic |
| 7       | <i>Aegolius funereus</i>       | Pierre-Alain RAVUSSIN          |                                                                                                                                              |                                                                                                                                                                                                                                                                                                               |
| 8       | <i>Aegolius funereus</i>       | Erkki KORPIMÄKI                | Mikko HAST, Kari HONGISTO, Timo HYRSKY, Vesa KOIVUNE, Marek KOUBA, Jorma NURMI, Reijo                                                        |                                                                                                                                                                                                                                                                                                               |

|    |                                 |                              |                                                                           |                                                                                                                                                                               |
|----|---------------------------------|------------------------------|---------------------------------------------------------------------------|-------------------------------------------------------------------------------------------------------------------------------------------------------------------------------|
|    |                                 |                              | PASSINEN, Rauno<br>VARJONEN, late Harri<br>HAKKARAINEN, Toni<br>LAAKSONEN |                                                                                                                                                                               |
| 9  | <i>Aethia cristatella</i>       | Pietrzak et al. (2017)       | the staff of Alaska Maritime<br>National Wildlife Refuge                  | Alaska Maritime National Wildlife Refuge                                                                                                                                      |
| 10 | <i>Aethia cristatella</i>       | Elena Yu. GOLUBOVA           |                                                                           |                                                                                                                                                                               |
| 11 | <i>Aethia psittacula</i>        | Pietrzak et al. (2017)       | the staff of Alaska Maritime<br>National Wildlife Refuge                  | Alaska Maritime National Wildlife Refuge                                                                                                                                      |
| 12 | <i>Aethia psittacula</i>        | Evans et al (2017)           | the staff of Alaska Maritime<br>National Wildlife Refuge                  | Alaska Maritime National Wildlife Refuge                                                                                                                                      |
| 13 | <i>Aethia psittacula</i>        | Elena Yu. GOLUBOVA           | the staff of Alaska Maritime<br>National Wildlife Refuge                  |                                                                                                                                                                               |
| 14 | <i>Aethia pusilla</i>           | Pietrzak et al. (2017)       | the staff of Alaska Maritime<br>National Wildlife Refuge                  | Alaska Maritime National Wildlife Refuge                                                                                                                                      |
| 15 | <i>Aethia pygmaea</i>           | Pietrzak et al. (2017)       | the staff of Alaska Maritime<br>National Wildlife Refuge                  | Alaska Maritime National Wildlife Refuge                                                                                                                                      |
| 16 | <i>Alca torda</i>               | Robert T. BARRETT            |                                                                           |                                                                                                                                                                               |
| 17 | <i>Alectrurus risora</i>        | Adrián S. DI<br>GIACOMO      | Alejandro G. DI GIACOMO                                                   | Agencia Nacional de Promoción Científica y Tecnológica (PICT 2018–<br>3407)<br>Alejandro Di Giacomo y ALPARAMIS S.A. for its support to work in<br>Reserva El Bagual, Formosa |
| 18 | <i>Anous tenuirostris</i>       | Ramos & Monticelli<br>(2007) |                                                                           |                                                                                                                                                                               |
| 19 | <i>Apus apus</i>                | Heikki KOLUNEN               |                                                                           |                                                                                                                                                                               |
| 20 | <i>Branta leucopsis</i>         | Jouke PROP                   |                                                                           |                                                                                                                                                                               |
| 21 | <i>Bucephala clangula</i>       | Hannu PÖYSÄ                  |                                                                           |                                                                                                                                                                               |
| 22 | <i>Bucorvus<br/>leadbeateri</i> | Kate F. CARSTENS             |                                                                           |                                                                                                                                                                               |
| 23 | <i>Bulweria bulwerii</i>        | Verónica C. NEVES            | Joël BRIED, Miriam CUESTA,<br>Wiebke SCHAEFER, Miguel                     | (1) Operational Program AZORES 2020, through the Fund 01-0145-<br>FEDER-000140 “MarAZ Researchers: Consolidate a body of researchers                                          |

|    |                                     |                      |                                                                                      |                                                                                                                                                                                                                                                                                                                                                                                                                                                                                                                                                                                                                                                                                                                                                                                                                                                                                                                                                   |
|----|-------------------------------------|----------------------|--------------------------------------------------------------------------------------|---------------------------------------------------------------------------------------------------------------------------------------------------------------------------------------------------------------------------------------------------------------------------------------------------------------------------------------------------------------------------------------------------------------------------------------------------------------------------------------------------------------------------------------------------------------------------------------------------------------------------------------------------------------------------------------------------------------------------------------------------------------------------------------------------------------------------------------------------------------------------------------------------------------------------------------------------|
|    |                                     |                      | TARITA, Pedro RAPOSO, Luís AGUIAR, Maria C. MAGALHÃES, Rémi FONTAINE, Malvina ANDRIS | in Marine Sciences in the Azores” of the European Union and the Azorean Science & Technology Fund (FRCT) through individual contracts M3.1.a/F/006/2016/008, (2) the project PTDC/BIABDE/67286/2006 funded by FCT and by FEDER through the Programme COMPETE (Ref: FCOMP-01-0124-FEDER-007061), and coordinated by JB, and (3) the Programmes ‘MARE’ (Integrated Management of Coastal and Marine Sites of the Azores, Life contract B4-3200/98-509), ‘OGAMP’ (Planning and Management of Marine Protected Areas, Interreg IIIB-MAC/4.2/A2), ‘MARMAC’ (Knowledge, Promotion and Valorization for a Sustainable Utilization of Marine Protected Areas in Macaronesia, Interreg IIIB/FEDER/MARMAC/003-4/2005-6 and Interreg IIIB-05/MAC/4.2/A4), and MoniAves, all coordinated by R. S. Santos. IMAR-DOP-UAç is funded by FCT and DRCT-Azores as Research Unit 531 and Associate Laboratory 9 (ISR-Lisbon)                                          |
| 24 | <i>Calonectris borealis</i>         | Joël BRIED           | Maria C. MAGALHÃES, Rémi FONTAINE, Malvina ANDRIS                                    | The data provided by Mark Bolton, Joël Bried and Verónica C. Neves were collected in the frame of (1) the projects PRAXIS/C/BIA/13194/98 and POCTI-BIA-13194/98 funded by FCT and coordinated by MB, (2) the project PTDC/BIABDE/67286/2006 funded by FCT and by FEDER through the Programme COMPETE (Ref: FCOMP-01-0124-FEDER-007061), and coordinated by JB, and (3) the Programmes ‘MARE’ (Integrated Management of Coastal and Marine Sites of the Azores, Life contract B4-3200/98-509), ‘OGAMP’ (Planning and Management of Marine Protected Areas, Interreg IIIB-MAC/4.2/A2), ‘MARMAC’ (Knowledge, Promotion and Valorization for a Sustainable Utilization of Marine Protected Areas in Macaronesia, Interreg IIIB/FEDER/MARMAC/003-4/2005-6 and Interreg IIIB-05/MAC/4.2/A4), and MoniAves, all coordinated by R. S. Santos. IMAR-DOP-UAç is funded by FCT and DRCT-Azores as Research Unit 531 and Associate Laboratory 9 (ISR-Lisbon). |
| 25 | <i>Calonectris diomedea</i>         | Daniel ORO           | Meritxell GENOVART, José Manuel IGUAL, Giacomo TAVECCHIA, Ana SANZ                   | Spanish Ministry of Science, AEI and FEDER funds (Grant ref. CGL2017-85210-P)<br>Ebro Delta N.P. and IMEDEA (CSIC-UIB)                                                                                                                                                                                                                                                                                                                                                                                                                                                                                                                                                                                                                                                                                                                                                                                                                            |
| 26 | <i>Calyptrorhynchus lathami</i>     | Morgan et al. (2015) |                                                                                      |                                                                                                                                                                                                                                                                                                                                                                                                                                                                                                                                                                                                                                                                                                                                                                                                                                                                                                                                                   |
| 27 | <i>Calyptrorhynchus latirostris</i> | Denis A. SAUNDERS    |                                                                                      |                                                                                                                                                                                                                                                                                                                                                                                                                                                                                                                                                                                                                                                                                                                                                                                                                                                                                                                                                   |

|    |                                   |                       |                                                                                                                                                                   |                                                                                                                                            |
|----|-----------------------------------|-----------------------|-------------------------------------------------------------------------------------------------------------------------------------------------------------------|--------------------------------------------------------------------------------------------------------------------------------------------|
| 28 | <i>Cerorhinca monocerata</i>      | Watanuki & Ito (2012) |                                                                                                                                                                   |                                                                                                                                            |
| 29 | <i>Cerorhinca monocerata</i>      | Evans et al. (2018)   | Alaska Maritime National Wildlife Refuge                                                                                                                          |                                                                                                                                            |
| 30 | <i>Chroicocephalus ridibundus</i> | Dariusz BUKACIŃSKI    | Monika BUKACIŃSKA,<br>Arkadiusz BUCZYŃSKI                                                                                                                         |                                                                                                                                            |
| 31 | <i>Ciconia ciconia</i>            | Andrzej Wuczyński     |                                                                                                                                                                   | Institute of Nature Conservation, Polish Academy of Sciences (statutory activity)                                                          |
| 32 | <i>Ciconia ciconia</i>            | Beata ORŁOWSKA        | Józef WITKOWSKI                                                                                                                                                   |                                                                                                                                            |
| 33 | <i>Ciconia ciconia</i>            | Marcin TOBOLKA        | Joanna T. BIAŁAS, Katarzyna M. ŻOŁNIEROWICZ, Stanisław KUŻNIAK                                                                                                    | National Science Centre (Poland): Sonata 2016/23/D/NZ8/01902, Preludium 2012/05/N/NZ8/01186                                                |
| 34 | <i>Ciconia ciconia</i>            | Anna V. CHERNOMORETS  | Irina E. SAMUSENKO, Aleksandr V. BALASH, Vasilij V. GRITSHIK                                                                                                      | Faculty of Biology, Belarusian State University<br>Scientific and Practical Center National Academy of Sciences of Belarus on bioresources |
| 35 | <i>Ciconia ciconia</i>            | Irina E. SAMUSENKO    | Anna V. CHERNOMORETS                                                                                                                                              |                                                                                                                                            |
| 36 | <i>Circus cyaneus</i>             | Alexandre MILLON      | Pascal ALBERT, Serge PARIS, Francis TALOT, Claude FREULET, Jean-Luc BOURRIOUX, Laurent COCQUYT, Bernard VACHERET, Roland FAYNOT, Vincent TERNOIS, Gérard CROUZIER |                                                                                                                                            |
| 37 | <i>Circus pygargus</i>            | Pascal ALBERT         |                                                                                                                                                                   |                                                                                                                                            |
| 38 | <i>Circus pygargus</i>            | Thierry PRINTEMPS     |                                                                                                                                                                   |                                                                                                                                            |
| 39 | <i>Circus pygargus</i>            | Jarosław WIĄCEK       |                                                                                                                                                                   |                                                                                                                                            |
| 40 | <i>Clanga clanga</i>              | Valery C. DOMBROVSKI  | Denis KITEL, Dzmitry ZHURAU LI OU, Oleg OSTROVSKY                                                                                                                 |                                                                                                                                            |
| 41 | <i>Clanga pomarina</i>            | Zbyryt et al (2015)   |                                                                                                                                                                   |                                                                                                                                            |

|    |                            |                     |                                                                                                                         |                                                                                                                                                   |
|----|----------------------------|---------------------|-------------------------------------------------------------------------------------------------------------------------|---------------------------------------------------------------------------------------------------------------------------------------------------|
| 42 | <i>Colaptes auratus</i>    | Karen L. WIEBE      |                                                                                                                         | NSERC Discovery Grant 203177                                                                                                                      |
| 43 | <i>Corvus corone</i>       | Vittorio BAGLIONE   | Daniela CANESTRARI                                                                                                      | Ministerio Español de Economía y Competitividad (project CGL 2016-77636-P to VB)<br>Agencia Estatal de Meteorología (AEMET)                       |
| 44 | <i>Cyanistes caeruleus</i> | Jaime POTTI         | Carlos CAMACHO, David CANAL                                                                                             |                                                                                                                                                   |
| 45 | <i>Cyanistes caeruleus</i> | János TÖRÖK         | Gergely HEGYI, Balázs ROSIVALL, László Zsolt GARAMSZEGI, Gergely NAGY, Miklós LACZI                                     |                                                                                                                                                   |
| 46 | <i>Cyanistes caeruleus</i> | Jerzy BAÑBURA       | Piotr ZIELIŃSKI, Adam KALIŃSKI, Jarosław WAWRZYŃIAK, Joanna SKWARSKA, Michał GLĄDALSKI, Marcin MARKOWSKI, Iwona DEMESKO | University of Lodz                                                                                                                                |
| 47 | <i>Cyanistes caeruleus</i> | Marcel E. VISSER    | Louis VERNOOIJ                                                                                                          |                                                                                                                                                   |
| 48 | <i>Cyanistes caeruleus</i> | Marcel E. VISSER    | Louis VERNOOIJ                                                                                                          |                                                                                                                                                   |
| 49 | <i>Cyanistes caeruleus</i> | Marcel E. VISSER    | Louis VERNOOIJ                                                                                                          |                                                                                                                                                   |
| 50 | <i>Cyanistes caeruleus</i> | Marcel E. VISSER    | Louis VERNOOIJ                                                                                                          |                                                                                                                                                   |
| 51 | <i>Cygnus bewickii</i>     | Diana V. SOLOVYEVA  |                                                                                                                         | Chukotka Gold Mine Co, a subsidiary of Kinross Gold; US Fish and Wildlife Service; The Wildfowl and Wetlands Trust                                |
| 52 | <i>Delichon urbicum</i>    | Alfonso MARZAL      |                                                                                                                         | Junta de Extremadura (IB20089)                                                                                                                    |
| 53 | <i>Diomedea exulans</i>    | Richard A. PHILLIPS | Andrew G. WOOD<br>Bird Island field assistants, John CROXALL                                                            | Ecosystems component of the British Antarctic Survey Polar Science for Planet Earth Programme, funded by The Natural Environment Research Council |
| 54 | <i>Falco naumanni</i>      | Inês CATRY          | Teresa CATRY, João GAMEIRO, Rita ALCAZAR, Aldina FRANCO                                                                 | Fundação para a Ciência e a Tecnologia (FCT) through contracts (DL57/2016/CP1440/CT0023)<br>grant to InBIO (UID/BIA/50027/2013)                   |



|    |                            |                         |                                                                                                                         |                                                                                                                                                                                                                                                                                                                                                                   |
|----|----------------------------|-------------------------|-------------------------------------------------------------------------------------------------------------------------|-------------------------------------------------------------------------------------------------------------------------------------------------------------------------------------------------------------------------------------------------------------------------------------------------------------------------------------------------------------------|
| 55 | <i>Falco tinnunculus</i>   | Juan Antonio FARGALLO   |                                                                                                                         | Ministerio de Ciencia e Innovación. Grant numbers: CGL2007–61395, CGL2010–15726, CGL2013–42451-P; Estación Biológica El Ventorrillo                                                                                                                                                                                                                               |
| 56 | <i>Ficedula albicollis</i> | Miloš KRIST             |                                                                                                                         |                                                                                                                                                                                                                                                                                                                                                                   |
| 57 | <i>Ficedula albicollis</i> | Peter ADAMÍK            | Miroslav KRÁL                                                                                                           | Czech Science Fundation grant no. 20-00648S                                                                                                                                                                                                                                                                                                                       |
| 58 | <i>Ficedula albicollis</i> | János TÖRÖK             | Gergely HEGYI, Balázs ROSIVALL, László Zsolt GARAMSZEGLI, Gergely NAGY, Miklós LACZI                                    |                                                                                                                                                                                                                                                                                                                                                                   |
| 59 | <i>Ficedula hypoleuca</i>  | Jaime POTTI             | Carlos CAMACHO, David CANAL                                                                                             |                                                                                                                                                                                                                                                                                                                                                                   |
| 60 | <i>Ficedula hypoleuca</i>  | Tapio Eeva              | Jorma NURMI                                                                                                             | Academy of Finland (338180)                                                                                                                                                                                                                                                                                                                                       |
| 61 | <i>Ficedula hypoleuca</i>  | Alexander V. ARTEMYEV   |                                                                                                                         | state orders IB KarRC RAS No. FMEN-2022-0003                                                                                                                                                                                                                                                                                                                      |
| 62 | <i>Ficedula hypoleuca</i>  | Marcel E. VISSER        | Louis VERNOOIJ                                                                                                          |                                                                                                                                                                                                                                                                                                                                                                   |
| 63 | <i>Ficedula hypoleuca</i>  | E. BELSKII & A. LYAKHOV |                                                                                                                         | Ministry of Science and Higher Education of the Russian Federation (State Contract with the Institute of Plant and Animal Ecology, Ural Branch, Russian Academy of Sciences, AAAA-A19-119031890088-4). Data on temperatures at the weather station in Revda were provided by the Ural Department of Hydrometeorology and Environmental Monitoring (Yekaterinburg) |
| 64 | <i>Ficedula hypoleuca</i>  | Boris D. KURANOV        |                                                                                                                         | Ministry of Science and Higher Education of the Russian Federation (project No. FSWM-2020-0019)                                                                                                                                                                                                                                                                   |
| 65 | <i>Ficedula hypoleuca</i>  | Mirosława BAÑBURA       | Piotr ZIELIŃSKI, Adam KALIŃSKI, Jarosław WAWRZYŃIAK, Joanna SKWARSKA, Michał GLĄDALSKI, Marcin MARKOWSKI, Iwona DEMESKO | University of Lodz                                                                                                                                                                                                                                                                                                                                                |
| 66 | <i>Ficedula hypoleuca</i>  | Indrikis KRAMS          | Tatjana KRAMA                                                                                                           |                                                                                                                                                                                                                                                                                                                                                                   |
| 67 | <i>Fratercula arctica</i>  | Robert T. BARRETT       |                                                                                                                         |                                                                                                                                                                                                                                                                                                                                                                   |

|    |                               |                        |                                                                                                              |                                                                     |
|----|-------------------------------|------------------------|--------------------------------------------------------------------------------------------------------------|---------------------------------------------------------------------|
| 68 | <i>Fratercula cirrhata</i>    | Youngren et al. (2018) | the staff of Alaska Maritime National Wildlife Refuge                                                        | Alaska Maritime National Wildlife Refuge                            |
| 69 | <i>Fratercula cirrhata</i>    | Pietrzak et al. (2017) | the staff of Alaska Maritime National Wildlife Refuge                                                        | Alaska Maritime National Wildlife Refuge                            |
| 70 | <i>Fratercula cirrhata</i>    | Evans et al (2017)     | the staff of Alaska Maritime National Wildlife Refuge                                                        | Alaska Maritime National Wildlife Refuge                            |
| 71 | <i>Fratercula cirrhata</i>    | Elena Yu. GOLUBOVA     |                                                                                                              |                                                                     |
| 72 | <i>Fratercula corniculata</i> | Youngren et al. (2018) | the staff of Alaska Maritime National Wildlife Refuge                                                        | Alaska Maritime National Wildlife Refuge                            |
| 73 | <i>Fratercula corniculata</i> | Pietrzak et al. (2017) | the staff of Alaska Maritime National Wildlife Refuge                                                        | Alaska Maritime National Wildlife Refuge                            |
| 74 | <i>Fratercula corniculata</i> | Evans et al (2017)     | the staff of Alaska Maritime National Wildlife Refuge                                                        | Alaska Maritime National Wildlife Refuge                            |
| 75 | <i>Fratercula corniculata</i> | Elena Yu. GOLUBOVA     |                                                                                                              |                                                                     |
| 76 | <i>Fulmarus glacialis</i>     | Paul M. THOMPSON       | George M. DUNNET (Deceased)                                                                                  |                                                                     |
| 77 | <i>Gypaetus barbatus</i>      | Antoni MARGALIDA       | Joan BERTRAN, Diego GARCÍA, Rafael PELAYO, Pedro PELAYO, Jordi CANUT, Elena VEGA, Juanjo GARCÍA, Jose BOLADO |                                                                     |
| 78 | <i>Gypaetus barbatus</i>      | Sonja C. KRÜGER        | Arjun AMAR                                                                                                   |                                                                     |
| 79 | <i>Haematopus bachmani</i>    | Youngren et al. (2018) |                                                                                                              |                                                                     |
| 80 | <i>Haematopus ostralegus</i>  | Martijn VAN DE POL     | Kees OOSTERBEEK, Christiaan BOTH                                                                             |                                                                     |
| 81 | <i>Hirundo rustica</i>        | Anders P. MØLLER       |                                                                                                              |                                                                     |
| 82 | <i>Hirundo rustica</i>        | Florentino DE LOPE     |                                                                                                              |                                                                     |
| 83 | <i>Jynx torquilla</i>         | Michael SCHAUB         |                                                                                                              |                                                                     |
| 84 | <i>Lamprotornis</i>           | Dustin R.              | Wilson NDERITU                                                                                               | U.S. National Science Foundation grants IOS-1257530 and IOS-1656098 |

|    |                                |                        |                                                                  |                                                                                                                                                                                                                                                                                                        |
|----|--------------------------------|------------------------|------------------------------------------------------------------|--------------------------------------------------------------------------------------------------------------------------------------------------------------------------------------------------------------------------------------------------------------------------------------------------------|
|    | <i>superbus</i>                | RUBENSTEIN             |                                                                  | to D.R.R<br>K. K. Caylor, J. Gitonga, D. J. Martins, Mpala Research Centre Meteorological and Hydrological Dataset [Datafile] (Mpala Research Centre, Laikipia, Kenya, 2017); accessible through <a href="https://mpala.org/data/weather-and-climate/">https://mpala.org/data/weather-and-climate/</a> |
| 85 | <i>Larus canus</i>             | Monika BUKACIŃSKA      | Dariusz BUKACIŃSKI,<br>Arkadiusz BUCZYŃSKI                       |                                                                                                                                                                                                                                                                                                        |
| 86 | <i>Larus crassirostris</i>     | Watanuki & Ito (2012)  |                                                                  |                                                                                                                                                                                                                                                                                                        |
| 87 | <i>Larus glaucescens</i>       | Youngren et al. (2018) | the staff of Alaska Maritime National Wildlife Refuge            | Alaska Maritime National Wildlife Refuge                                                                                                                                                                                                                                                               |
| 88 | <i>Larus glaucescens</i>       | Pietrzak et al. (2017) | the staff of Alaska Maritime National Wildlife Refuge            | Alaska Maritime National Wildlife Refuge                                                                                                                                                                                                                                                               |
| 89 | <i>Larus glaucescens</i>       | Evans et al (2017)     | the staff of Alaska Maritime National Wildlife Refuge            | Alaska Maritime National Wildlife Refuge                                                                                                                                                                                                                                                               |
| 90 | <i>Larus glaucescens</i>       | Evans et al (2018)     | the staff of Alaska Maritime National Wildlife Refuge            | Alaska Maritime National Wildlife Refuge                                                                                                                                                                                                                                                               |
| 91 | <i>Macronectes giganteus</i>   | Andrew G. WOOD         | Richard A. PHILLIPS<br>Bird Island field assistants              | Ecosystems component of the British Antarctic Survey Polar Science for Planet Earth Programme, funded by The Natural Environment Research Council                                                                                                                                                      |
| 92 | <i>Macronectes halli</i>       | Andrew G. WOOD         | Richard A. PHILLIPS<br>Bird Island field assistants              | Ecosystems component of the British Antarctic Survey Polar Science for Planet Earth Programme, funded by The Natural Environment Research Council                                                                                                                                                      |
| 93 | <i>Malurus elegans</i>         | Lyanne BROUWER         | Marina LOUWER                                                    | Australian Research Council (DE130100174)                                                                                                                                                                                                                                                              |
| 94 | <i>Margarops fuscatus</i>      | Wayne J. ARENDT        | Jerry BAUER, Marvin A. TÓRREZ, Susannah B. LERMAN, David I. KING | USDA Forest Service, International Institute of Tropical Forestry                                                                                                                                                                                                                                      |
| 95 | <i>Melanerpes formicivorus</i> | Walter D. KOENIG       | Eric L. WALTERS                                                  |                                                                                                                                                                                                                                                                                                        |
| 96 | <i>Mergus squamatus</i>        | Diana V. SOLOVYEVA     |                                                                  | Chukotka Gold Mine Co, a subsidiary of Kinross Gold; US Fish and Wildlife Service; The Wildfowl and Wetlands Trust                                                                                                                                                                                     |
| 97 | <i>Milvus migrans</i>          | Fabrizio SERGIO        | Julio BLAS, Fernando HIRALDO, Alessandro                         | Spanish Ministry of Science, Innovation and Universities with Feder Funds (project PGC2018-095860-B-I00)                                                                                                                                                                                               |

|     |                              |                            |                                                       |                                                                                                                                                                                                                                                                                                                                                                                                                                                                                                                                                                                                                                                                                                                                                                                                                                                                                                                                                                                                                                                                                                   |
|-----|------------------------------|----------------------------|-------------------------------------------------------|---------------------------------------------------------------------------------------------------------------------------------------------------------------------------------------------------------------------------------------------------------------------------------------------------------------------------------------------------------------------------------------------------------------------------------------------------------------------------------------------------------------------------------------------------------------------------------------------------------------------------------------------------------------------------------------------------------------------------------------------------------------------------------------------------------------------------------------------------------------------------------------------------------------------------------------------------------------------------------------------------------------------------------------------------------------------------------------------------|
|     |                              |                            | TANFERNA                                              | Junta de Andalucía, Consejería de Conocimiento, Investigación y Universidad (Spain) (P18-FR-4239)                                                                                                                                                                                                                                                                                                                                                                                                                                                                                                                                                                                                                                                                                                                                                                                                                                                                                                                                                                                                 |
| 98  | <i>Oceanodroma furcata</i>   | Youngren et al. (2018)     | the staff of Alaska Maritime National Wildlife Refuge | Alaska Maritime National Wildlife Refuge                                                                                                                                                                                                                                                                                                                                                                                                                                                                                                                                                                                                                                                                                                                                                                                                                                                                                                                                                                                                                                                          |
| 99  | <i>Oceanodroma furcata</i>   | Pietrzak et al. (2017)     | the staff of Alaska Maritime National Wildlife Refuge | Alaska Maritime National Wildlife Refuge                                                                                                                                                                                                                                                                                                                                                                                                                                                                                                                                                                                                                                                                                                                                                                                                                                                                                                                                                                                                                                                          |
| 100 | <i>Oceanodroma furcata</i>   | Kettle (2017)              | the staff of Alaska Maritime National Wildlife Refuge | Alaska Maritime National Wildlife Refuge                                                                                                                                                                                                                                                                                                                                                                                                                                                                                                                                                                                                                                                                                                                                                                                                                                                                                                                                                                                                                                                          |
| 101 | <i>Oceanodroma furcata</i>   | Evans et al (2018)         | the staff of Alaska Maritime National Wildlife Refuge | Alaska Maritime National Wildlife Refuge                                                                                                                                                                                                                                                                                                                                                                                                                                                                                                                                                                                                                                                                                                                                                                                                                                                                                                                                                                                                                                                          |
| 102 | <i>Oceanodroma furcata</i>   | Drummond & Williams (2015) | the staff of Alaska Maritime National Wildlife Refuge | Alaska Maritime National Wildlife Refuge                                                                                                                                                                                                                                                                                                                                                                                                                                                                                                                                                                                                                                                                                                                                                                                                                                                                                                                                                                                                                                                          |
| 103 | <i>Oceanodroma leucorhoa</i> | Youngren et al. (2018)     | the staff of Alaska Maritime National Wildlife Refuge | Alaska Maritime National Wildlife Refuge                                                                                                                                                                                                                                                                                                                                                                                                                                                                                                                                                                                                                                                                                                                                                                                                                                                                                                                                                                                                                                                          |
| 104 | <i>Oceanodroma leucorhoa</i> | Pietrzak et al. (2017)     | the staff of Alaska Maritime National Wildlife Refuge | Alaska Maritime National Wildlife Refuge                                                                                                                                                                                                                                                                                                                                                                                                                                                                                                                                                                                                                                                                                                                                                                                                                                                                                                                                                                                                                                                          |
| 105 | <i>Oceanodroma leucorhoa</i> | Evans et al (2018)         | the staff of Alaska Maritime National Wildlife Refuge | Alaska Maritime National Wildlife Refuge                                                                                                                                                                                                                                                                                                                                                                                                                                                                                                                                                                                                                                                                                                                                                                                                                                                                                                                                                                                                                                                          |
| 106 | <i>Oceanodroma monteiroi</i> | Mark BOLTON                | Joël BRIED                                            | The data provided by Mark Bolton, Joël Bried and Verónica C. Neves were collected in the frame of (1) the projects PRAXIS/C/BIA/13194/98 and POCTI-BIA-13194/98 funded by FCT and coordinated by MB, (2) the project PTDC/BIABDE/67286/2006 funded by FCT and by FEDER through the Programme COMPETE (Ref: FCOMP-01-0124-FEDER-007061), and coordinated by JB, and (3) the Programmes 'MARE' (Integrated Management of Coastal and Marine Sites of the Azores, Life contract B4-3200/98-509), 'OGAMP' (Planning and Management of Marine Protected Areas, Interreg IIIB-MAC/4.2/A2), 'MARMAC' (Knowledge, Promotion and Valorization for a Sustainable Utilization of Marine Protected Areas in Macaronesia, Interreg IIIB/FEDER/MARMAC/003-4/2005-6 and Interreg IIIB-05/MAC/4.2/A4), and MoniAves, all coordinated by R. S. Santos. IMAR-DOP/UAç is funded by FCT and DRCT-Azores as Research Unit 531 and Associate Laboratory 9 (ISR-Lisbon). Meteorological data were provided by the 'Delegação Regional dos Açores do Instituto Português do Mar e da Atmosfera' (Portuguese Institute for |

|     |                                  |                          |                                                                                     |                                                                                                                                                                                                                                                             |
|-----|----------------------------------|--------------------------|-------------------------------------------------------------------------------------|-------------------------------------------------------------------------------------------------------------------------------------------------------------------------------------------------------------------------------------------------------------|
|     |                                  |                          |                                                                                     | Sea and Atmosphere - Azores Regional Delegation).                                                                                                                                                                                                           |
| 107 | <i>Oenanthe oenanthe</i>         | Debora ARLT              | Tomas PÄRT                                                                          | Swedish Research Council VR;<br>Swedish Research Council Formas;<br>Ultuna Climate Station                                                                                                                                                                  |
| 108 | <i>Pachyptila belcheri</i>       | Petra QUILLFELDT         |                                                                                     |                                                                                                                                                                                                                                                             |
| 109 | <i>Panurus biarmicus</i>         | Janusz Stepniewski       |                                                                                     |                                                                                                                                                                                                                                                             |
| 110 | <i>Parus major</i>               | Marcel E. VISSER         | Louis VERNOOIJ                                                                      |                                                                                                                                                                                                                                                             |
| 111 | <i>Parus major</i>               | Marcel E. VISSER         | Louis VERNOOIJ                                                                      |                                                                                                                                                                                                                                                             |
| 112 | <i>Parus major</i>               | Marcel E. VISSER         | Louis VERNOOIJ                                                                      |                                                                                                                                                                                                                                                             |
| 113 | <i>Parus major</i>               | Marcel E. VISSER         | Louis VERNOOIJ                                                                      |                                                                                                                                                                                                                                                             |
| 114 | <i>Parus major</i>               | Juan C. Senar            | J. QUESADA, F. MATEOS, E. PAGANI, H. NAVALPOTRO, L. ARROYO, D. MAZZONI              | Ministry of Science and Innovation (CGL-2020 PID2020-114907GB-C21)                                                                                                                                                                                          |
| 115 | <i>Parus major</i>               | Emilio BARBA             | Elena ÁLVAREZ                                                                       |                                                                                                                                                                                                                                                             |
| 116 | <i>Parus major</i>               | János TÖRÖK              | Gergely HEGYI, Balázs ROSIVALL, László Zsolt GARAMSZEGI, Gergely NAGY, Miklós LACZI |                                                                                                                                                                                                                                                             |
| 117 | <i>Parus major</i>               | Indrikis KRAMS           | Tatjana KRAMA                                                                       |                                                                                                                                                                                                                                                             |
| 118 | <i>Passer domesticus</i>         | David F. WESTNEAT        | I.R.K. STEWART, M.I. HATCH, D.P. WETZEL, A. MUTZEL, R. FOX                          | U.S. National Science Foundation (IBN-9816989, IBN-0542097 and IOS1257718)                                                                                                                                                                                  |
| 119 | <i>Passerculus sandwichensis</i> | Nathaniel T. WHEELWRIGHT |                                                                                     |                                                                                                                                                                                                                                                             |
| 120 | <i>Perisoreus infaustus</i>      | Michael GRIESSER         |                                                                                     | Swiss National Science Foundation (PPOOP3_123520, PP00P3_150752, ERANet BiodivERsA (31BD30_172465d), Swedish Research Council (also to Jan Ekman), FORMAS (to Jan Ekman), University of Zurich, Deutsche Forschungsgemeinschaft (GR 4650/3-1, GR 4650/2-1). |
| 121 | <i>Phaethon lepturus</i>         | Ramos et al. (2005)      |                                                                                     |                                                                                                                                                                                                                                                             |

|     |                                 |                            |                                                       |                                                                                                                                                                                                                                                                                                                                                 |
|-----|---------------------------------|----------------------------|-------------------------------------------------------|-------------------------------------------------------------------------------------------------------------------------------------------------------------------------------------------------------------------------------------------------------------------------------------------------------------------------------------------------|
| 122 | <i>Phalacrocorax auritus</i>    | Youngren et al. (2018)     | the staff of Alaska Maritime National Wildlife Refuge | Alaska Maritime National Wildlife Refuge                                                                                                                                                                                                                                                                                                        |
| 123 | <i>Phalacrocorax capillatus</i> | Watanuki & Ito (2012)      |                                                       |                                                                                                                                                                                                                                                                                                                                                 |
| 124 | <i>Phalacrocorax pelagicus</i>  | Youngren et al. (2018)     | the staff of Alaska Maritime National Wildlife Refuge | Alaska Maritime National Wildlife Refuge                                                                                                                                                                                                                                                                                                        |
| 125 | <i>Phalacrocorax pelagicus</i>  | Pietrzak et al. (2017)     | the staff of Alaska Maritime National Wildlife Refuge | Alaska Maritime National Wildlife Refuge                                                                                                                                                                                                                                                                                                        |
| 126 | <i>Phalacrocorax pelagicus</i>  | Evans et al (2018)         | the staff of Alaska Maritime National Wildlife Refuge | Alaska Maritime National Wildlife Refuge                                                                                                                                                                                                                                                                                                        |
| 127 | <i>Phalacrocorax pelagicus</i>  | Hatch (2017)               | the staff of Alaska Maritime National Wildlife Refuge | Alaska Maritime National Wildlife Refuge                                                                                                                                                                                                                                                                                                        |
| 128 | <i>Phalacrocorax urile</i>      | Youngren et al. (2018)     | the staff of Alaska Maritime National Wildlife Refuge | Alaska Maritime National Wildlife Refuge                                                                                                                                                                                                                                                                                                        |
| 129 | <i>Phalacrocorax urile</i>      | Pollom et al. (2018)       | the staff of Alaska Maritime National Wildlife Refuge | Alaska Maritime National Wildlife Refuge                                                                                                                                                                                                                                                                                                        |
| 130 | <i>Phalacrocorax urile</i>      | Mong et al. (2017)         | the staff of Alaska Maritime National Wildlife Refuge | Alaska Maritime National Wildlife Refuge                                                                                                                                                                                                                                                                                                        |
| 131 | <i>Phalacrocorax urile</i>      | Drummond & Williams (2015) | the staff of Alaska Maritime National Wildlife Refuge | Alaska Maritime National Wildlife Refuge                                                                                                                                                                                                                                                                                                        |
| 132 | <i>Philetairus socius</i>       | Rita COVAS                 | Claire DOUTRELANT                                     | DST-NRF Centre of Excellence at the FitzPatrick Institute of African Ornithology (South Africa), FCT (Portugal; grants IF/01411/2014/CP1256/ CT0007 and PTDC/BIA-EVF/5249/2014 to RC) and ANR (France; grants ANR- 15-CE32-0012-02 and ANR 19-CE02-0014-02 to CD).<br>De Beers Mining Corporation provided access to Benfontein Nature Reserve. |
| 133 | <i>Phoebastria immutabilis</i>  | Donald C. DEARBORN         | Elizabeth N. FLINT                                    |                                                                                                                                                                                                                                                                                                                                                 |
| 134 | <i>Phoebastria nigripes</i>     | Donald C. DEARBORN         | Elizabeth N. FLINT                                    |                                                                                                                                                                                                                                                                                                                                                 |
| 135 | <i>Phoenicurus phoenicurus</i>  | Jiří PORKERT               |                                                       |                                                                                                                                                                                                                                                                                                                                                 |

|     |                                |                                 |                                                       |                                                                                                                                                                                                                                                                                                                                                                                                                                                                                                                                                                                     |
|-----|--------------------------------|---------------------------------|-------------------------------------------------------|-------------------------------------------------------------------------------------------------------------------------------------------------------------------------------------------------------------------------------------------------------------------------------------------------------------------------------------------------------------------------------------------------------------------------------------------------------------------------------------------------------------------------------------------------------------------------------------|
| 136 | <i>Phoenicurus phoenicurus</i> | Sergey I. GASHKOV               |                                                       | Grant RSF 22-24-00468                                                                                                                                                                                                                                                                                                                                                                                                                                                                                                                                                               |
| 137 | <i>Plectrophenax nivalis</i>   | Yngve ESPMARK                   | Arne MOKSNES                                          |                                                                                                                                                                                                                                                                                                                                                                                                                                                                                                                                                                                     |
| 138 | <i>Podiceps grisegena</i>      | Janusz KLOSKOWSKI               |                                                       |                                                                                                                                                                                                                                                                                                                                                                                                                                                                                                                                                                                     |
| 139 | <i>Protonotaria citrea</i>     | Jeffrey P. HOOVER               | Wendy M. SCHELSKY, Scott K. ROBINSON                  | United States Fish and Wildlife Service (INT 1448-0003-95-1007 and Neotropical Migratory Bird Conservation Act funds), the Illinois Department of Natural Resources (Conservation 2000 Grant and State Wildlife Grant), The Nature Conservancy in Illinois, The National Fish and Wildlife Fund, The R.J. Kosie Fund, Wings Over the Americas, the University of Illinois , Champaign County and Decatur Audubon Societies, Illinois Ornithological Society, American Ornithologists' Union, Sigma Xi, North American Bluebird Society, and the American Museum of Natural History. |
| 140 | <i>Protonotaria citrea</i>     | Lesley BULLUCK                  | Charles BLEM, Cathy VIVERETTE                         |                                                                                                                                                                                                                                                                                                                                                                                                                                                                                                                                                                                     |
| 141 | <i>Pygoscelis adeliae</i>      | Louise M. EMMERSON              | Colin SOUTHWELL, Knowles KERRY                        | Australian Antarctic Division provided funding and logistics through Australian Antarctic Science projects 2722, 2205, 4086, and 4518                                                                                                                                                                                                                                                                                                                                                                                                                                               |
| 142 | <i>Pygoscelis adeliae</i>      | Michael J. DUNN                 | Signy Island field assistants                         | Ecosystems component of the British Antarctic Survey Polar Science for Planet Earth Programme, funded by The Natural Environment Research Council                                                                                                                                                                                                                                                                                                                                                                                                                                   |
| 143 | <i>Pygoscelis antarcticus</i>  | Małgorzata KORCZAK-ABSHIRE      | Boleslaw JABLONSKI, Kazimierz SIERAKOWSKI             | Henryk Arctowski Polish Antarctic Station                                                                                                                                                                                                                                                                                                                                                                                                                                                                                                                                           |
| 144 | <i>Rissa brevirostris</i>      | Pietrzak et al. (2017)          | the staff of Alaska Maritime National Wildlife Refuge | Alaska Maritime National Wildlife Refuge                                                                                                                                                                                                                                                                                                                                                                                                                                                                                                                                            |
| 145 | <i>Rissa brevirostris</i>      | Pollom et al. (2018)            | the staff of Alaska Maritime National Wildlife Refuge | Alaska Maritime National Wildlife Refuge                                                                                                                                                                                                                                                                                                                                                                                                                                                                                                                                            |
| 146 | <i>Rissa brevirostris</i>      | Mong et al. (2017)              | the staff of Alaska Maritime National Wildlife Refuge | Alaska Maritime National Wildlife Refuge                                                                                                                                                                                                                                                                                                                                                                                                                                                                                                                                            |
| 147 | <i>Rissa tridactyla</i>        | Turner (2010, 2015, 2016, 2017) |                                                       |                                                                                                                                                                                                                                                                                                                                                                                                                                                                                                                                                                                     |
| 148 | <i>Rissa tridactyla</i>        | Robert T. BARRETT               |                                                       |                                                                                                                                                                                                                                                                                                                                                                                                                                                                                                                                                                                     |

|     |                             |                            |                                                       |                                                                                                                                                                                                                                    |
|-----|-----------------------------|----------------------------|-------------------------------------------------------|------------------------------------------------------------------------------------------------------------------------------------------------------------------------------------------------------------------------------------|
| 149 | <i>Rissa tridactyla</i>     | Mong et al. (2017)         | the staff of Alaska Maritime National Wildlife Refuge | Alaska Maritime National Wildlife Refuge                                                                                                                                                                                           |
| 150 | <i>Rissa tridactyla</i>     | Murphy et al. (2016)       | the staff of Alaska Maritime National Wildlife Refuge | Alaska Maritime National Wildlife Refuge                                                                                                                                                                                           |
| 151 | <i>Rissa tridactyla</i>     | Pietrzak et al. (2017)     | the staff of Alaska Maritime National Wildlife Refuge | Alaska Maritime National Wildlife Refuge                                                                                                                                                                                           |
| 152 | <i>Rissa tridactyla</i>     | Dragoo et al. (2017)       | the staff of Alaska Maritime National Wildlife Refuge | Alaska Maritime National Wildlife Refuge                                                                                                                                                                                           |
| 153 | <i>Rissa tridactyla</i>     | Evans et al (2017)         | the staff of Alaska Maritime National Wildlife Refuge | Alaska Maritime National Wildlife Refuge                                                                                                                                                                                           |
| 154 | <i>Rissa tridactyla</i>     | Kettle (2017)              | the staff of Alaska Maritime National Wildlife Refuge | Alaska Maritime National Wildlife Refuge                                                                                                                                                                                           |
| 155 | <i>Rissa tridactyla</i>     | Pollom et al. (2018)       | the staff of Alaska Maritime National Wildlife Refuge | Alaska Maritime National Wildlife Refuge                                                                                                                                                                                           |
| 156 | <i>Rissa tridactyla</i>     | Hatch (2017)               | the staff of Alaska Maritime National Wildlife Refuge | Alaska Maritime National Wildlife Refuge                                                                                                                                                                                           |
| 157 | <i>Rissa tridactyla</i>     | Elena Yu. GOLUBOVA         |                                                       |                                                                                                                                                                                                                                    |
| 158 | <i>Rissa tridactyla</i>     | Drummond & Williams (2015) | the staff of Alaska Maritime National Wildlife Refuge | Alaska Maritime National Wildlife Refuge                                                                                                                                                                                           |
| 159 | <i>Somateria fischeri</i>   | Diana V. SOLOVYEVA         |                                                       | Chukotka Gold Mine Co, a subsidiary of Kinross Gold; US Fish and Wildlife Service; The Wildfowl and Wetlands Trust                                                                                                                 |
| 160 | <i>Somateria mollissima</i> | Markus ÖST                 | Kim JAATINEN, Benjamin B. STEELE                      | Swedish Cultural Foundation in Finland [grant numbers 17/3317, 602 16/1476, 15/3296, 14/2657, 13/2654, 138139, 149014, 158026, 168333 and 177733 to M.Ö.];<br>Tvärminne Zoological Station, University of Helsinki, Hanko, Finland |
| 161 | <i>Sterna dougallii</i>     | Seward et al (2018)        |                                                       |                                                                                                                                                                                                                                    |
| 162 | <i>Sterna dougallii</i>     | Seward et al (2018)        |                                                       |                                                                                                                                                                                                                                    |
| 163 | <i>Sterna dougallii</i>     | Seward et al (2018)        |                                                       |                                                                                                                                                                                                                                    |
| 164 | <i>Sterna dougallii</i>     | Jaime A. RAMOS             | David MONTICELLI                                      | strategic program of MARE, financed by FCT (UID/MAR/04292/ 2020), through national funds; James Cadbury of the Royal Society for Nature Conservation and Aride Island Nature Reserve                                               |



|     |                                  |                          |                                                                                                                 |                                                                                                                                                                                                                                                               |
|-----|----------------------------------|--------------------------|-----------------------------------------------------------------------------------------------------------------|---------------------------------------------------------------------------------------------------------------------------------------------------------------------------------------------------------------------------------------------------------------|
| 165 | <i>Sterna hirundo</i>            | Peter H. BECKER          | Sandra BOUWHUIS, K. Lesley SZOSTEK                                                                              | German Research Foundation (Be 916);<br>Institute of Avian Research (together with Sandra Bouwhuis);<br>Station Cuxhaven, Deutscher Wetterdienst www.dwd.de                                                                                                   |
| 166 | <i>Strix aluco</i>               | Tapio SOLONEN            |                                                                                                                 |                                                                                                                                                                                                                                                               |
| 167 | <i>Strix aluco</i>               | Patrik KARELL            | Kari AHOLA, Teuvo KARSTINEN, Esa AALTONEN                                                                       | Academy of Finland (grant numbers 309992, 335335, and 314108)                                                                                                                                                                                                 |
| 168 | <i>Strix aluco</i>               | Xavier LAMBIN            | Steve J PETTY, Martin DAVIDSON, Alexandre MILLON, Brian LITTLE (deceased) and local staff from FORESTRY ENGLAND |                                                                                                                                                                                                                                                               |
| 169 | <i>Strix uralensis</i>           | Hannu PIETIÄINEN         |                                                                                                                 |                                                                                                                                                                                                                                                               |
| 170 | <i>Sturnus unicolor</i>          | Vicente POLO             |                                                                                                                 |                                                                                                                                                                                                                                                               |
| 171 | <i>Sturnus vulgaris</i>          | Alexander NUMEROV        |                                                                                                                 |                                                                                                                                                                                                                                                               |
| 172 | <i>Sula neboxii</i>              | Hugh DRUMMOND            | Cristina RODRÍGUEZ JUAREZ                                                                                       | UNAM PAPIIT (grants IN211491, IN-200702-3, IN206610-3, IN205313 and IN205819); CONACYT (grants 81823, 47599, 34500-V, 4722-N9407 and 104313);<br>National Geographic Society (grant 991416);<br>Mexican Navy and the staff of the Parque Nacional Isla Isabel |
| 173 | <i>Synthliboramphus antiquus</i> | Youngren et al. (2018)   | Alaska Maritime National Wildlife Refuge                                                                        |                                                                                                                                                                                                                                                               |
| 174 | <i>Synthliboramphus antiquus</i> | Elena Yu. GOLUBOVA       |                                                                                                                 |                                                                                                                                                                                                                                                               |
| 175 | <i>Tachycineta bicolor</i>       | Michael P. LOMBARDO      | Patrick A. THORPE                                                                                               |                                                                                                                                                                                                                                                               |
| 176 | <i>Tachycineta bicolor</i>       | Nathaniel T. WHEELWRIGHT |                                                                                                                 |                                                                                                                                                                                                                                                               |
| 177 | <i>Tachymarptis melba</i>        | Pierre Bize              | Charlotte KARSEGARD                                                                                             | This work was funded over the years by grants from the Swiss National Science Foundation (PA00A-109009, 31003A_124988), Carnegie Trust (RIG007773) and University of Aberdeen Research Board to Pierre Bize                                                   |
| 178 | <i>Tachymarptis melba</i>        | Pierre Bize              | Charlotte KARSEGARD                                                                                             | This work was funded over the years by grants from the Swiss National                                                                                                                                                                                         |

|     |                                  |                        |                                                              |                                                                                                                                                   |
|-----|----------------------------------|------------------------|--------------------------------------------------------------|---------------------------------------------------------------------------------------------------------------------------------------------------|
|     |                                  |                        |                                                              | Science Foundation (PA00A-109009, 31003A_124988), Carnegie Trust (RIG007773) and University of Aberdeen Research Board to Pierre Bize             |
| 179 | <i>Tetrao (Lyrurus) tetricus</i> | Wegge & Rolstad (2017) |                                                              |                                                                                                                                                   |
| 180 | <i>Tetrao urogallus</i>          | Wegge & Rolstad (2017) |                                                              |                                                                                                                                                   |
| 181 | <i>Tetrao urogallus</i>          | Moss et al. (2001)     |                                                              |                                                                                                                                                   |
| 182 | <i>Thalassarche chrysostoma</i>  | Richard A. PHILLIPS    | Andrew G. WOOD<br>Bird Island field assistants, John CROXALL | Ecosystems component of the British Antarctic Survey Polar Science for Planet Earth Programme, funded by The Natural Environment Research Council |
| 183 | <i>Thalassarche melanophris</i>  | Richard A. PHILLIPS    | Andrew G. WOOD<br>Bird Island field assistants, John CROXALL | Ecosystems component of the British Antarctic Survey Polar Science for Planet Earth Programme, funded by The Natural Environment Research Council |
| 184 | <i>Troglodytes aedon</i>         | E. Keith BOWERS        | Charles F. THOMPSON, Scott K. SAKALUK                        |                                                                                                                                                   |
| 185 | <i>Turdus merula</i>             | Dariusz WYSOCKI        |                                                              |                                                                                                                                                   |
| 186 | <i>Tyto alba</i>                 | Alexandre ROULIN       |                                                              |                                                                                                                                                   |
| 187 | <i>Tyto alba</i>                 | Motti CHARTER          |                                                              |                                                                                                                                                   |
| 188 | <i>Uria aalge</i>                | Michael P. HARRIS      | Sarah WANLESS, Francis DAUNT, Mark NEWELL                    |                                                                                                                                                   |
| 189 | <i>Uria aalge</i>                | Mong et al. (2017)     | the staff of Alaska Maritime National Wildlife Refuge        | Alaska Maritime National Wildlife Refuge                                                                                                          |
| 190 | <i>Uria aalge</i>                | Youngren et al. (2018) | the staff of Alaska Maritime National Wildlife Refuge        | Alaska Maritime National Wildlife Refuge                                                                                                          |
| 191 | <i>Uria aalge</i>                | Evans et al (2017)     | the staff of Alaska Maritime National Wildlife Refuge        | Alaska Maritime National Wildlife Refuge                                                                                                          |
| 192 | <i>Uria aalge</i>                | Evans et al (2018)     | the staff of Alaska Maritime National Wildlife Refuge        | Alaska Maritime National Wildlife Refuge                                                                                                          |
| 193 | <i>Uria aalge</i>                | Pollom et al. (2018)   | the staff of Alaska Maritime National Wildlife Refuge        | Alaska Maritime National Wildlife Refuge                                                                                                          |

|     |                    |                        |                                                       |                                          |
|-----|--------------------|------------------------|-------------------------------------------------------|------------------------------------------|
| 194 | <i>Uria aalge</i>  | Elena Yu. GOLUBOVA     |                                                       |                                          |
| 195 | <i>Uria lomvia</i> | Pollom et al. (2018)   | the staff of Alaska Maritime National Wildlife Refuge | Alaska Maritime National Wildlife Refuge |
| 196 | <i>Uria lomvia</i> | Mong et al. (2017)     | the staff of Alaska Maritime National Wildlife Refuge | Alaska Maritime National Wildlife Refuge |
| 197 | <i>Uria lomvia</i> | Youngren et al. (2018) | the staff of Alaska Maritime National Wildlife Refuge | Alaska Maritime National Wildlife Refuge |
| 198 | <i>Uria lomvia</i> | Pietrzak et al. (2017) | the staff of Alaska Maritime National Wildlife Refuge | Alaska Maritime National Wildlife Refuge |
| 199 | <i>Uria lomvia</i> | Evans et al (2017)     | the staff of Alaska Maritime National Wildlife Refuge | Alaska Maritime National Wildlife Refuge |
| 200 | <i>Uria lomvia</i> | Evans et al (2018)     | the staff of Alaska Maritime National Wildlife Refuge | Alaska Maritime National Wildlife Refuge |
| 201 | <i>Uria lomvia</i> | Elena Yu. GOLUBOVA     |                                                       |                                          |
